# Supplementary material for: Prescription Opioid Use and Risk for Major Depressive Disorder and Anxiety and Stress-Related Disorders: A Multivariable Mendelian Randomization Analysis
Source: PubMed Central journal article supplement (PMC7658804; doi:10.1001/jamapsychiatry.2020.3554), 2020-11-11
Supplement: jamapsychiatry-e203554-s001.pdf [file jamapsychiatry-e203554-s001.pdf]

## Supplemental Online Content

Rosoff DB, Smith GD, Lohoff FW. Prescription opioid use and risk for major depressive disorder: a multivariable mendelian randomization analysis. *JAMA Psychiatry*. Published online November 11, 2020. doi:10.1001/jamapsychiatry.2020.3554

**eMethods.** Detailed Methods.

**eTable 1.** Neuropsychiatric Disorders and Prescription Medication Use Phenotypes: Source and Description

**eTable 2.** Opioid and Non-Opioid Pain Medication and Active Ingredients by ATC Category in 318 177 UK Biobank European Individuals

**eTable 3.** Independent Instruments for Prescription Opioid Use: Harmonized Data

**eTable 4.** Independent Instruments for Salicylic Acid Use: Harmonized Data

**eTable 5.** Independent Instruments for Anilides Use: Harmonized Data

**eTable 6.** Independent Instruments for NSAID Use: Harmonized Data

**eTable 7.** Independent Instruments for Anxiety and Stress Related Disorder: Harmonized Data

**eTable 8.** Independent Instruments for Major Depressive Disorder: Harmonized Data

**eTable 9.** Multivariable Instrument for Medications Use: Independent Instruments for Prescription Opioid and Non-Opioid Pain Medications

**eTable 10.** Multivariable Instruments for Exposures Prescription Opioid Use and Abdominal/ Stomach Pain for 3+ Months in UKB Participants on MDD and ASRD: Data Harmonized

**eTable 11.** Multivariable Instruments for Exposures Prescription Opioid Use and Neck/ Shoulder Pain for 3+ Months in UKB Participants on MDD and ASRD: Data Harmonized

**eTable 12.** Multivariable Instruments for Exposures Prescription Opioid Use and Pain for 3+ Months in UKB Participants on MDD and ASRD: Data Harmonized

**eTable 13.** Multivariable Instruments for Exposures Prescription Opioid Use and Knee Pain for 3+ Months in UKB Participants on MDD and ASRD: Data Harmonized

**eTable 14.** Multivariable Instruments for Exposures Prescription Opioid Use and Headache Pain for 3+ Months in UKB Participants on MDD and ASRD: Data Harmonized

**eTable 15.** Bidirectional Single Variable Mendelian Randomization Results of Opioid Use Risk in UK Biobank Participants Versus Neuropsychiatric Disorders

**eTable 16.** Bidirectional Single Variable Mendelian Randomization Results of Salicylic Acid and Derivatives Use Risk in UK Biobank Participants Versus Neuropsychiatric Disorders

**eTable 17.** Bidirectional Single Variable Mendelian Randomization Results of Anilide Use Risk in UK Biobank Participants Versus Neuropsychiatric Disorders

**eTable 18.** Bidirectional Single Variable Mendelian Randomization Results of NSAID Use Risk in UK Biobank Participants Versus Neuropsychiatric Disorders

**eTable 19.** Multivariable Mendelian Randomization Results of Opioid and Non-Opioid Use Risk in UK Biobank Participants on Neuropsychiatric Disorders

**eTable 20.** Multivariable Mendelian Randomization Results of Opioid Use Risk Accounting for Chronic Pain in UK Biobank Participants on MDD and ASRD

**eFigure 1.** Leave-1-Out Analysis of Associations of Genetic Risk of Salicylic Acid/ Derivatives Use on Risk of MDD and ASRD

**eFigure 2.** Leave-1-Out Analysis of Associations of Genetic Risk of Anilide Use on Risk of MDD and ASRD

**eFigure 3.** Leave-1-Out Analysis of Associations of Genetic Risk of NSAID Use on Risk of MDD and ASRD

**eFigure 4.** Leave-1-Out Analysis of Associations of Genetic Risk of ASRD on Risk of Pain Medications Use

**eFigure 5.** Leave-1-Out Analysis of Associations of Genetic Risk of MDD on Risk of Pain Medications Use

This supplemental material has been provided by the authors to give readers additional information about their work.

## **eMethods. Detailed Methodology.**

### **Opioid and Non-Opioid Pain Medication Use**

We used summary genetic association statistics from a recent medication use case-control GWAS published in 2019 based on 318 177 individuals of European ancestry from the UK Biobank (UKB) prospective cohort study (collected across the United Kingdom from 2006-2010).<sup>1</sup> In the overall starting cohort of 502 616 UK Biobank participants with medication records, approximately 54% were female, with mean age 56.5 (standard deviation 8.1 years); the proportion of participants taking medications increased with age and was higher for females than males: approximately 67% females took medications at 40 years of age, and 90% at 70, compared to 50% males at age 40 years, and 85% at 70. UKB classified medications into 6 745 categories; only 1 809 were reported by  $\geq 10$  participants: 1752 were classified (classifiable) by active ingredient using the Anatomical Therapeutic Chemical Classification System (ATC) and then assigned to 23 categories by active ingredient, including but not limited to opioids (e.g. morphine, oxycodone, codeine, fentanyl, pethidine, and tramadol), non-steroidal anti-inflammatory and antirheumatic products, anilides and salicylic acid products (the medications included in the present study are listed in eTable 2 in the Supplement). For the GWAS, 318 177 of the initial cohort remained having non-blank medication records and taking any of the 1 752 medications taken by  $\geq 10$  participants and classifiable using the ATC.

### **Major Depression and/or Major Depressive Disorder (MDD)**

We used summary statistics from the recent PGC GWAS meta-analysis published in 2018 based on 135 458 cases and 344 901 controls from 35 studies from populations of predominantly European ancestry.<sup>2</sup> The included studies used a range of methods for assessing MDD or major depression: cases were required to meet international consensus criteria (DSM-IV, ICD-9, or ICD-10) for a lifetime diagnosis of MDD, established based upon any of the following: structured diagnostic instruments from assessments by trained interviewers; clinician-administered checklists or medical record reviews; electronic hospital records, or national inpatient records; and in two cohorts, self-report (i.e. in the UKB cohort, self-identification as MDD inpatient, MDD or anxiety psychiatric out-patient, or depression or anhedonia diagnosis; in the 23andMe cohort, self-identification of diagnosed clinical depression or depression). Most of the studies included in the PGC GWAS meta-analysis applied typical inclusion and exclusion criteria for both cases and controls (e.g. excluding cases with lifetime bipolar disorder or schizophrenia and excluding controls with major depression). Notwithstanding the range of methods for assessing major depressive disorder or major depression (combined, MDD), the cohorts were determined to be genetically comparable (for purposes of the GWAS). Due to the restrictions on the use of the 23andMe cohort, and to minimize sample overlap (see section, below), we used summary statistics from the meta-analysis done excluding both the UKB (14 260 cases and 15 480 controls) and 23andMe cohorts (59 851 cases and 113 154 controls) to extract SNP outcome effects corresponding to pain medications use instrument SNPs for the single variable Mendelian randomization (SVMR) analyses of pain medication use risk. We used the meta-analysis done with both UKB and 23andMe cohorts (total N = 480 359).

### **Anxiety and Stress-Related Disorder (ASRD)**

We used summary statistics from the recent iPSYCH GWAS based on 12 655 individuals with anxiety and stress-related diagnoses and 19 225 controls from Denmark: all individuals participated in iPSYCH, a study designed to disentangle risk factors of severe psychiatric disorders, including schizophrenia, autism, attention-deficit/hyperactivity disorder, anorexia nervosa, and affective disorders.<sup>3</sup> The cases were identified through the national research registers on the basis of having a record of an anxiety or stress-related diagnosis assigned by a psychiatrist during routine clinical care according to the international Statistical Classification of Diseases and Related Health Problems (10<sup>th</sup> Revision), excluding individuals with comorbid autism. Controls comprised individuals not diagnosed with anxiety, stress-related disorders, or mood disorders. The GWAS was performed<sup>2</sup> using logistic regression, with covariates including the first 4 principal components to control for remaining population stratification; the results were meta-analyzed using an inverse variance-weighted fixed-effects model.

### **Pain-Related Covariates**

To account for pain in our MVMR analyses, we extracted SNPs from the MRC-IEU UK Biobank GWAS based on the responses of individuals of European ancestry from the UK Biobank prospective cohort study.<sup>4</sup> We included all independent SNPs associated with opioid use and each of six PHEASANT-derived phenotypes from the UK Biobank

binary variables (“Yes/No”) related to site-specific chronic pain occurring for 3+ months: back (UK Biobank data-field 3571); knee (UK Biobank data-field 3773); hip (UK Biobank data-field 3414); neck/shoulder (UK Biobank data-field 3404); headache (UK Biobank data-field 3799); abdominal/stomach (UK Biobank data-field 3741). We pruned the results to exclude all SNPs with a pairwise LD ( $r^2 > .001$ , 10 000 kb window), then extracted the resulting multivariable MR instrument SNPs from the MDD and ASRD GWASs, and harmonized exposure and outcome data (eTables 10-14 in the Supplement).

### Sample Independence

Participant overlap in samples used to estimate genetic associations between exposure and outcome in two sample MR can bias results,<sup>5,6</sup> so we endeavored to minimize overlapping to reduce this source of weak instrument bias. In the present study, we avoided overlap between the cohorts used in the UK Biobank medication use GWASs vis-à-vis those used in the iPSYCH ASRD and the PGC MDD GWASs, the latter using the PGC MDD GWAS excluding both UK Biobank ( $N = 29\,740$ ) and 23andMe cohorts ( $N = 307\,354$ ). However, to improve precision for the bidirectional analyses, we used the PGC MDD GWAS including both UK Biobank and 23andMe cohorts for the largest sample size publicly available ( $N = 480\,359$ ) and extracted exposure instruments therefrom: the single common cohort (between MDD vis-à-vis opioid and non-opioid pain medication use) accounted for 6.2% of participants in the PGC MDD GWAS: the relevant percentage overlap for purposes of determining weak instrument bias (WIB) is taken with respect to the larger data set since only the presence of participants in both studies leads to correlation in estimates.<sup>6</sup> Given the strength of the instruments for MDD (the combined instrument  $F$  statistic ranged from 31.7 to 32.3; the corresponding lower limit of the 95% confidence interval of the estimate ranged from 29.9 to 30.4 (eTables 15-18 in the Supplement)), and simulation studies of the association between sample overlap and the degree of WIB, considerable WIB bias is not expected.<sup>6</sup> We were unable to calculate conditional  $F$ -statistics to assess the strength of our multivariable instruments: SVMR statistical methods recently extended by Sanderson et al. to two sample MVMR are appropriate only for non-overlapping exposure summary level data sources; when overlapping, the requisite pairwise covariances between SNP associations are determinable only using individual level data.<sup>7</sup>

### Statistical Analysis

For SVMR, applied to assess the total effects of each of the opioid and non-opioid pain medication use risk on each of MDD and ASRD, and vice versa, we used inverse-variance weighted MR (MR IVW) (single variable weighted linear regression) as the main method. We included MR Egger, weighted median, and weighted mode methods to assess the evidence of the causal effects of opioid and non-opioid pain medication use on risk of each of the neuropsychiatric outcomes, and vice versa, so as to detect the sensitivity of our results to different patterns of violations of IV assumptions: consistency of results across MR methods strengthens an inference of causality.<sup>8</sup> MR IVW is regarded as the main method: in the absence of pleiotropy and assuming the instruments are valid, MR IVW returns unbiased estimates of a causal effect so long as horizontal pleiotropy is balanced.<sup>8,9</sup> MR Egger extends MR IVW by not setting the intercept to zero, thus allowing the net horizontal pleiotropic effect across all SNPs to be unbalanced or directional (i.e. some SNPs could be acting on the outcome through a pathway other than through the exposure).<sup>9,10</sup> MR Egger returns unbiased causal effect estimates even if the assumption of no horizontal pleiotropy is violated for all SNPs, but the estimates may be substantially less precise than MR IVW: while the precision of the IVW estimate depends on the proportion of variance in the exposure explained by the genetic instruments, MR Egger precision depends as well on the variability of the SNP exposure effects. Weighted median MR uses the median effect of all available SNPs, so that only half of the SNPs need to be valid instruments (i.e. no horizontal pleiotropy, no association with confounders, and robust association with the exposure) to return an unbiased causal effect estimate. Stronger SNPs contribute more towards the causal estimate, with the contribution of each SNP weighted by the inverse variance of its association with the outcome.<sup>11</sup> Weighted mode-based MR clusters the SNPs into groups based on similarity of causal effects and returns the causal effect estimate based on the cluster that has the largest number of SNPs: unbiased causal effects so long as the SNPs within the largest cluster are valid instruments. Weighted mode MR weights each SNP’s contribution to the clustering by the inverse variance of its outcome effect. Assuming the most common causal effect is consistent, the estimated causal effects would be unbiased even if all other instruments are invalid.<sup>12</sup>

### Multivariable Mendelian Randomization

We estimated the direct effect of each exposure using multivariable Mendelian randomization (MVMR). MVMR simultaneously estimates the effects of multiple exposures using multiple sets of overlapping SNPs identified in the

relevant GWASs at  $P < 5 \times 10^{-6}$  (less than conventional genome wide significance) as instruments, pruned to exclude duplicative SNPs, as well as SNPs in LD ( $R^2 > .001$ , 10 000 kilobase pair windows, using the 1000 Genomes Reference Panel) with other SNPs.

For MVMR, applied to assess the direct or independent effects of opioid and non-opioid pain medication use on MDD and ASRD, we used the extension developed by Burgess et al.<sup>5</sup> of the inverse-variance weighted MR method, performing multivariable weighted linear regression (variants uncorrelated, random effect model) with the intercept term set to zero,<sup>9</sup> and, additionally, the MVMR extension of the MR Egger method to correct for both measured and unmeasured pleiotropy.<sup>13</sup>

### Sensitivity Analyses and Diagnostics

To evaluate heterogeneity in genetic instruments effects, indicating potential violations of the instrumental variable (IV) assumptions, we used the MR Egger intercept test,<sup>14</sup> the Cochran Q heterogeneity test,<sup>15</sup> and the MR pleiotropy residual sum and outlier (MR-PRESSO) test.<sup>16</sup> A MR Egger regression intercept is generally interpreted as the average pleiotropic effect across all instruments: MR-Egger regression thus provides a test for average pleiotropy, and further has been extended to correct for both measured and unmeasured pleiotropy in MVMR.<sup>13</sup> The Cochran Q test, used to identify outliers in regression analysis generally, has been applied in MR to detect average pleiotropy: pleiotropy can induce heterogeneity of individual ratio estimates.<sup>16</sup> MR-PRESSO detects pleiotropic bias in MR caused by violation of the exclusion restriction IV assumption; extending the principal of the Cochran Q test, MR-PRESSO provides a global test to detect pleiotropic bias and identify sources of the bias (so called outlier SNPs), and further has been extended to detect pleiotropic bias also in MVMR<sup>16</sup>. We used the MR-PRESSO global test to identify outlier SNPs; removing the outlier SNPs, we reran the MR, and retested so as to determine whether removing outliers resolved the detected heterogeneity.

Two sample MR is normally conceptualized as meta-analyzing the Wald ratios from each instrument, but this is of course equivalent to a weighted regression of the SNP exposure effects on the SNP outcome effects. We have implicitly tested linear regression violations – e.g. median based estimator tests how sensitive the results are to outliers.<sup>17</sup> We used Steiger filtering to identify and exclude instruments that exhibited reverse causation.<sup>18</sup> We also used MR PRESSO methods to identify and remove points of high leverage that may be driving the results.<sup>16</sup> Finally, we performed leave-one-out analysis (leaving each genetic variant out of the IVW MR analysis in turn) to assess whether points of high leverage were points of high influence<sup>18</sup> (analyses plotted Figure 2; eFigures 1-5 in the Supplement).

We estimated the total effects of risk of opioid and non-opioid pain medication use on MDD and ASRD, and vice versa in a bidirectional check, using two-sample single variable Mendelian randomization (Tables 1 and 2; Figure 2; eTables 15-18 in the Supplement), which approach estimates the effect including any effects mediated or moderated through any other trait.<sup>19</sup> Results for the former are reported as odds ratios (OR) of MDD or ASRD risk per unit increase in log odds of the opioid or non-opioid use, and results for the latter are reported as OR of opioid or non-opioid use per unit increase in the log odds of MDD or ASRD.

### References

1. Wu Y, Byrne EM, Zheng Z, et al. Genome-wide association study of medication-use and associated disease in the UK Biobank. *Nature Communications*. 2019;10(1):1891.
2. Wray NR, Ripke S, Mattheisen M, et al. Genome-wide association analyses identify 44 risk variants and refine the genetic architecture of major depression. *Nat Genet*. 2018;50(5):668-681.
3. Meier SM, Trontti K, Purves KL, et al. Genetic Variants Associated With Anxiety and Stress-Related Disorders: A Genome-Wide Association Study and Mouse-Model Study. *JAMA Psychiatry*. 2019;76(9):924-932.
4. Elsworth B, Mitchell, R, Raistrick, CA, Paternoster, L, Hemani, G, Gaunt, TR MRC IEU UK Biobank GWAS pipeline version 1. 2017. doi: <https://doi.org/10.5523/bris.2fahpksont1zi26xosyamqo8rr>. Accessed Feb 2, 2019.
5. Burgess S, Thompson SG. Multivariable Mendelian randomization: the use of pleiotropic genetic variants to estimate causal effects. *Am J Epidemiol*. 2015;181(4):251-260.

6. Burgess S, Davies NM, Thompson SG. Bias due to participant overlap in two-sample Mendelian randomization. *Genet Epidemiol.* 2016;40(7):597-608.
7. Sanderson E, Spiller W, Bowden J. Testing and Correcting for Weak and Pleiotropic Instruments in Two-Sample Multivariable Mendelian Randomisation. *bioRxiv (preprint)*. 2020:2020.2004.2002.021980.
8. Hemani G, Zheng J, Elsworth B, et al. The MR-Base platform supports systematic causal inference across the human phenome. *Elife.* 2018;7.
9. Bowden J, Smith GD, Burgess S. Mendelian randomization with invalid instruments: effect estimation and bias detection through Egger regression. *International Journal of Epidemiology.* 2015;44(2):512-525.
10. Davey Smith G, Bowden J, Del Greco M F, Minelli C, Thompson JR, Sheehan NA. Assessing the suitability of summary data for two-sample Mendelian randomization analyses using MR-Egger regression: the role of the I<sup>2</sup> statistic. *International Journal of Epidemiology.* 2016;45(6):1961-1974.
11. Bowden J, Davey Smith G, Haycock PC, Burgess S. Consistent Estimation in Mendelian Randomization with Some Invalid Instruments Using a Weighted Median Estimator. *Genet Epidemiol.* 2016;40(4):304-314.
12. Hartwig FP, Davey Smith G, Bowden J. Robust inference in summary data Mendelian randomization via the zero modal pleiotropy assumption. *Int J Epidemiol.* 2017;46(6):1985-1998.
13. Rees JMB, Wood AM, Burgess S. Extending the MR-Egger method for multivariable Mendelian randomization to correct for both measured and unmeasured pleiotropy. *Stat Med.* 2017;36(29):4705-4718.
14. Bowden J, Del Greco MF, Minelli C, Smith GD, Sheehan N, Thompson J. A framework for the investigation of pleiotropy in two-sample summary data Mendelian randomization. *Statistics in Medicine.* 2017;36(11):1783-1802.
15. Bowden J, Del Greco MF, Minelli C, et al. Improving the accuracy of two-sample summary-data Mendelian randomization: moving beyond the NOME assumption. *Int J Epidemiol.* 2019;48(3):728-742.
16. Verbanck M, Chen CY, Neale B, Do R. Detection of widespread horizontal pleiotropy in causal relationships inferred from Mendelian randomization between complex traits and diseases. *Nat Genet.* 2018;50(5):693-698.
17. Bowden J, Davey Smith G, Haycock PC, Burgess S. Consistent Estimation in Mendelian Randomization with Some Invalid Instruments Using a Weighted Median Estimator. *Genet Epidemiol.* 2016;40(4):304-314.
18. Hemani G, Bowden J, Davey Smith G. Evaluating the potential role of pleiotropy in Mendelian randomization studies. *Human Molecular Genetics.* 2018;27(R2):R195-R208.
19. Sanderson E, Davey Smith G, Windmeijer F, Bowden J. An examination of multivariable Mendelian randomization in the single-sample and two-sample summary data settings. *Int J Epidemiol.* 2019;48(3):713-727.

**eTable 1. Neuropsychiatric Disorders and Prescription Medication Use Phenotypes: Source and Description**

| PHENOTYPES                           | Consortium | First Author (Year)          | Sample Size | Cases  | Controls | h    | SE (h) | Population     | Download                                                                                                                                                                          |
|--------------------------------------|------------|------------------------------|-------------|--------|----------|------|--------|----------------|-----------------------------------------------------------------------------------------------------------------------------------------------------------------------------------|
| <b>Neuropsychiatric disorders:</b>   |            |                              |             |        |          |      |        |                |                                                                                                                                                                                   |
| STRESS RELATED DISORDER              | iPSYCH     | Maier (2019) <sup>3</sup>    | 31890       | 12665  | 19225    | 0.28 | 0.027  | European       | <a href="https://ipsych.dk/forskning/downloads/">https://ipsych.dk/forskning/downloads/</a>                                                                                       |
| MAJOR DEPRESSIVE DISORDER (outcome)  | PGC        | Wray (2018) <sup>2</sup>     | 143265      | 45591  | 97674    | N/A  | N/A    | European       | <a href="https://www.med.unc.edu/pgc/results-and-downloads/mdd/">https://www.med.unc.edu/pgc/results-and-downloads/mdd/</a>                                                       |
| MAJOR DEPRESSIVE DISORDER (exposure) | PGC        | Wray (2018)                  | 480359      | 135458 | 344901   | 0.09 | 0.004  | European       | <a href="https://www.med.unc.edu/pgc/results-and-downloads/mdd/">https://www.med.unc.edu/pgc/results-and-downloads/mdd/</a>                                                       |
| <b>Medications Use:</b>              |            |                              |             |        |          |      |        |                |                                                                                                                                                                                   |
| OPIOID USE                           | NA         | Wu (2019) <sup>1</sup>       | 78808       | 22982  | 55826    | 0.15 | 0.008  | European (UKB) | <a href="ftp://ftp.ebi.ac.uk/pub/databases/gwas/summary_statistics/WuY_31015401_GCST007936">ftp://ftp.ebi.ac.uk/pub/databases/gwas/summary_statistics/WuY_31015401_GCST007936</a> |
| ANILIDE USE                          | NA         | Wu (2019)                    | 179870      | 83218  | 96592    | 0.06 | 0.004  | European (UKB) | <a href="ftp://ftp.ebi.ac.uk/pub/databases/gwas/summary_statistics/WuY_31015401_GCST007938">ftp://ftp.ebi.ac.uk/pub/databases/gwas/summary_statistics/WuY_31015401_GCST007938</a> |
| NSAID USE                            | NA         | Wu (2019)                    | 164520      | 74150  | 90370    | 0.06 | 0.004  | European (UKB) | <a href="ftp://ftp.ebi.ac.uk/pub/databases/gwas/summary_statistics/WuY_31015401_GCST007934">ftp://ftp.ebi.ac.uk/pub/databases/gwas/summary_statistics/WuY_31015401_GCST007934</a> |
| SALICYLIC ACID AND DERIVATIVES USE   | NA         | Wu (2019)                    | 112010      | 61583  | 50427    | 0.03 | 0.004  | European (UKB) | <a href="ftp://ftp.ebi.ac.uk/pub/databases/gwas/summary_statistics/WuY_31015401_GCST007942">ftp://ftp.ebi.ac.uk/pub/databases/gwas/summary_statistics/WuY_31015401_GCST007942</a> |
| <b>Chronic Pain (3+ months):</b>     |            |                              |             |        |          |      |        |                |                                                                                                                                                                                   |
| Back                                 | MRC-IEU    | Elsworth (2018) <sup>4</sup> | 117404      | 80588  | 36816    | NA   | NA     | European (UKB) | <a href="https://gwas.mrcieu.ac.uk/datasets/ukb-b-8463">https://gwas.mrcieu.ac.uk/datasets/ukb-b-8463</a>                                                                         |
| Neck/ Shoulder                       | MRC-IEU    | Elsworth (2018)              | 105396      | 72887  | 32509    | NA   | NA     | European (UKB) | <a href="https://gwas.mrcieu.ac.uk/datasets/ukb-b-16118">https://gwas.mrcieu.ac.uk/datasets/ukb-b-16118</a>                                                                       |
| Hip                                  | MRC-IEU    | Elsworth (2018)              | 51516       | 40152  | 11369    | NA   | NA     | European (UKB) | <a href="https://gwas.mrcieu.ac.uk/datasets/ukb-b-133">https://gwas.mrcieu.ac.uk/datasets/ukb-b-133</a>                                                                           |
| Headaches                            | MRC-IEU    | Elsworth (2018)              | 91269       | 41719  | 49550    | NA   | NA     | European (UKB) | <a href="https://gwas.mrcieu.ac.uk/datasets/ukb-b-13092">https://gwas.mrcieu.ac.uk/datasets/ukb-b-13092</a>                                                                       |
| Knee                                 | MRC-IEU    | Elsworth (2018)              | 97889       | 76910  | 20979    | NA   | NA     | European (UKB) | <a href="https://gwas.mrcieu.ac.uk/datasets/ukb-b-8906">https://gwas.mrcieu.ac.uk/datasets/ukb-b-8906</a>                                                                         |
| Stomach/ Abdominal                   | MRC-IEU    | Elsworth (2018)              | 38911       | 21711  | 17200    | NA   | NA     | European (UKB) | <a href="https://gwas.mrcieu.ac.uk/datasets/ukb-b-19097">https://gwas.mrcieu.ac.uk/datasets/ukb-b-19097</a>                                                                       |

| <b>Abbreviations:</b>                                                         |
|-------------------------------------------------------------------------------|
| PGC: Psychiatric Genomics Consortium                                          |
| iPSYCH: The Lundbeck Foundation for Integrative Psychiatric Research          |
| MRC-IEU: Medical Research Center-Integrative Epidemiology Center (UK Bristol) |
| UKB: UK Biobank                                                               |
| NSAID: Non-steroidal anti-inflammatory or antirheumatic drugs                 |
| MDD: Major depressive disorder/ major depression                              |
| h: heritability (reported in GWAS)                                            |
| SE(h): standard error of h                                                    |

**eTable 2. Opioid and Non-Opioid Pain Medication and Active Ingredients by ATC Category in 318 177 UK Biobank European Individuals**

| Category | Medication                                    | UK Biobank Code | ATC Code | Drug Name/ Active Ingredient(s)               |
|----------|-----------------------------------------------|-----------------|----------|-----------------------------------------------|
| OPIOIDS  | morphine                                      | 1140871692      | N02AA01  | Morphine                                      |
| OPIOIDS  | oramorph 10mg/5ml oral solution               | 1140882272      | N02AA01  | Morphine                                      |
| OPIOIDS  | mst continus 30mg m/r tablet                  | 1140871780      | N02AA01  | Morphine                                      |
| OPIOIDS  | mst continus 10mg m/r tablet                  | 1140871776      | N02AA01  | Morphine                                      |
| OPIOIDS  | zomorph 10mg m/r capsule                      | 1141152986      | N02AA01  | Morphine                                      |
| OPIOIDS  | oramorph 100mg/5ml concentrated oral solution | 1140882274      | N02AA01  | Morphine                                      |
| OPIOIDS  | sevredol 10mg tablet                          | 1140871700      | N02AA01  | Morphine                                      |
| OPIOIDS  | zomorph 30mg m/r capsule                      | 1141152988      | N02AA01  | Morphine                                      |
| OPIOIDS  | oramorph 10mg/5ml oral unit dose vial         | 1140871778      | N02AA01  | Morphine                                      |
| OPIOIDS  | mst continus 100mg m/r tablet                 | 1140871786      | N02AA01  | Morphine                                      |
| OPIOIDS  | oramorph sr 10mg m/r tablet                   | 1140871712      | N02AA01  | Morphine                                      |
| OPIOIDS  | mst continus 60mg m/r tablet                  | 1140871782      | N02AA01  | Morphine                                      |
| OPIOIDS  | sevredol 20mg tablet                          | 1140871704      | N02AA01  | Morphine                                      |
| OPIOIDS  | zomorph 100mg m/r capsule                     | 1141152992      | N02AA01  | Morphine                                      |
| OPIOIDS  | oxycodone hydrochloride                       | 1141171038      | N02AA05  | Oxycodone                                     |
| OPIOIDS  | oxycontin 10mg m/r tablet                     | 1141171048      | N02AA05  | Oxycodone                                     |
| OPIOIDS  | oxycontin 20mg m/r tablet                     | 1141171050      | N02AA05  | Oxycodone                                     |
| OPIOIDS  | oxynorm 5mg capsule                           | 1141171066      | N02AA05  | Oxycodone                                     |
| OPIOIDS  | oxynorm 10mg capsule                          | 1141170964      | N02AA05  | Oxycodone                                     |
| OPIOIDS  | oxycontin 5mg m/r tablet                      | 1141180792      | N02AA05  | Oxycodone                                     |
| OPIOIDS  | oxycontin 40mg m/r tablet                     | 1141171052      | N02AA05  | Oxycodone                                     |
| OPIOIDS  | oxynorm 20mg capsule                          | 1141170966      | N02AA05  | Oxycodone                                     |
| OPIOIDS  | oxycontin 80mg m/r tablet                     | 1141171054      | N02AA05  | Oxycodone                                     |
| OPIOIDS  | dihydrocodeine                                | 1140884464      | N02AA08  | Dihydrocodeine                                |
| OPIOIDS  | dhc continus 60mg m/r tablet                  | 1140871920      | N02AA08  | Dihydrocodeine                                |
| OPIOIDS  | df118 30mg tablet                             | 1140856454      | N02AA08  | Dihydrocodeine                                |
| OPIOIDS  | dhc continus 120mg m/r tablet                 | 1140871926      | N02AA08  | Dihydrocodeine                                |
| OPIOIDS  | codeine phosphate+kaolin 10mg/3g/10ml mixture | 1140865654      | N02AA59  | Codeine  Kaolin                               |
| OPIOIDS  | migraleve duopack tablet                      | 1140872026      | N02AA79  | Acetaminophen  Codeine  Buclizine             |
| OPIOIDS  | feminax tablet                                | 1141188522      | N02AA79  | Caffeine  Acetaminophen  Codeine  Scopolamine |
| OPIOIDS  | pethidine                                     | 1140884388      | N02AB02  | Pethidine                                     |
| OPIOIDS  | durogesic 25micrograms/hour patch             | 1140911830      | N02AB03  | Fentanyl                                      |
| OPIOIDS  | durogesic 50micrograms/hour patch             | 1140911832      | N02AB03  | Fentanyl                                      |
| OPIOIDS  | durogesic 75micrograms/hour patch             | 1140911834      | N02AB03  | Fentanyl                                      |
| OPIOIDS  | durogesic 100micrograms/hour patch            | 1140911836      | N02AB03  | Fentanyl                                      |
| OPIOIDS  | co-proxamol                                   | 1140923348      | N02AC54  | Acetaminophen  Dextropropoxyphene             |
| OPIOIDS  | temgesic 200mcg sublingual tablet             | 1140871734      | N02AE01  | Buprenorphine                                 |



| Category | Medication                                   | UK Biobank Code | ATC Code         | Drug Name/ Active Ingredient(s)   |
|----------|----------------------------------------------|-----------------|------------------|-----------------------------------|
| OPIOIDS  | temgesic 400mcg sublingual tablet            | 1140871738      | N02AE01          | Buprenorphine                     |
| OPIOIDS  | transtec 35micrograms/hour transdermal patch | 1141180012      | N02AE01          | Buprenorphine                     |
| OPIOIDS  | transtec 70micrograms/hour transdermal patch | 1141180020      | N02AE01          | Buprenorphine                     |
| OPIOIDS  | buprenorphine                                | 1140871732      | N02AE01  N07BC01 | Buprenorphine                     |
| OPIOIDS  | distalgesic tablet                           | 1140868260      | N02AJ            | Acetaminophen  Dextropropoxyphene |
| OPIOIDS  | co-dydramol                                  | 1140923350      | N02AJ01          | Acetaminophen  Dihydrocodeine     |
| OPIOIDS  | remedeine tablet                             | 1140871684      | N02AJ01          | Acetaminophen  Dihydrocodeine     |
| OPIOIDS  | paracetamol+dihydrocodeine tartrate          | 1140882396      | N02AJ01          | Acetaminophen  Dihydrocodeine     |
| OPIOIDS  | paramol tablet                               | 1140863552      | N02AJ01          | Acetaminophen  Dihydrocodeine     |
| OPIOIDS  | remedeine forte tablet                       | 1140871686      | N02AJ01          | Acetaminophen  Dihydrocodeine     |
| OPIOIDS  | co-codamol                                   | 1140923346      | N02AJ06          | Acetaminophen  Codeine            |
| OPIOIDS  | paracetamol + codeine                        | 1140882394      | N02AJ06          | Acetaminophen  Codeine            |
| OPIOIDS  | solpadol caplet                              | 1140871688      | N02AJ06          | Acetaminophen  Codeine            |
| OPIOIDS  | syndol tablet                                | 1140856342      | N02AJ06          | Acetaminophen  Codeine  Ketorolac |
| OPIOIDS  | solpadol capsule                             | 1141168122      | N02AJ06          | Acetaminophen  Codeine            |
| OPIOIDS  | tylex capsule                                | 1140871680      | N02AJ06          | Acetaminophen  Codeine            |
| OPIOIDS  | zapain caplet                                | 1141178052      | N02AJ06          | Acetaminophen  Codeine            |
| OPIOIDS  | solpadeine capsule                           | 1141168650      | N02AJ06          | Caffeine  Acetaminophen  Codeine  |
| OPIOIDS  | kapake tablet                                | 1140864070      | N02AJ06          | Acetaminophen  Codeine            |
| OPIOIDS  | codipar caplet                               | 1141187304      | N02AJ06          | Acetaminophen  Codeine            |
| OPIOIDS  | solpadeine tablet                            | 1141168648      | N02AJ06          | Acetaminophen  Codeine            |
| OPIOIDS  | kapake capsule                               | 1141165512      | N02AJ06          | Acetaminophen  Codeine            |
| OPIOIDS  | solpadol effervescent tablet                 | 1140871682      | N02AJ06          | Acetaminophen  Codeine            |
| OPIOIDS  | zapain capsule                               | 1141178054      | N02AJ06          | Acetaminophen  Codeine            |
| OPIOIDS  | paracodol capsule                            | 1140925778      | N02AJ06          | Acetaminophen  Codeine            |
| OPIOIDS  | migraleve yellow tablet                      | 1140872030      | N02AJ06          | Acetaminophen  Codeine            |
| OPIOIDS  | kapake 30/500 effervescent tablet            | 1141190656      | N02AJ06          | Acetaminophen  Codeine            |
| OPIOIDS  | solpadeine forte dispersible tablet          | 1140856340      | N02AJ06          | Caffeine  Acetaminophen  Codeine  |
| OPIOIDS  | codis dispersible tablet                     | 1140856336      | N02AJ07          | Codeine  Acetylsalicylic Acid     |
| OPIOIDS  | aspirin+codeine                              | 1140882392      | N02AJ07          | Codeine  Acetylsalicylic Acid     |
| OPIOIDS  | co-codaprin                                  | 1140923344      | N02AJ07          | Codeine  Acetylsalicylic Acid     |
| OPIOIDS  | ibuprofen+codeine phosphate                  | 1140878030      | N02AJ08          | Codeine  Ibuprofen                |
| OPIOIDS  | cuprofen plus tablet                         | 1141190952      | N02AJ08          | Codeine  Ibuprofen                |
| OPIOIDS  | migraleve tablet                             | 1141168554      | N02AJ09          | Acetaminophen  Codeine  Buclizine |
| OPIOIDS  | solpadeine soluble effervescent tablet       | 1140856442      | N02AJ09          | Caffeine  Acetaminophen  Codeine  |
| OPIOIDS  | solpadeine plus soluble effervescent tablet  | 1141189064      | N02AJ09          | Caffeine  Acetaminophen  Codeine  |
| OPIOIDS  | solpadeine plus capsule                      | 1141189008      | N02AJ09          | Caffeine  Acetaminophen  Codeine  |
| OPIOIDS  | solpadeine max tablet                        | 1141167748      | N02AJ09          | Acetaminophen  Codeine            |
| OPIOIDS  | solpadeine plus tablet                       | 1141189010      | N02AJ09          | Caffeine  Acetaminophen  Codeine  |
| OPIOIDS  | veganin tablet                               | 1140856348      | N02AJ09          | Caffeine  Acetaminophen  Codeine  |

| Category | Medication                       | UK Biobank Code | ATC Code                  | Drug Name/ Active Ingredient(s)                   |
|----------|----------------------------------|-----------------|---------------------------|---------------------------------------------------|
| OPIOIDS  | propain tablet                   | 1140856436      | N02AJ09                   | Caffeine  Acetaminophen  Codeine  Diphenhydramine |
| OPIOIDS  | propain caplet                   | 1141172966      | N02AJ09                   | Caffeine  Acetaminophen  Codeine  Diphenhydramine |
| OPIOIDS  | tramacet 325mg/37.5mg tablet     | 1141190960      | N02AJ13                   | Tramadol  Acetaminophen                           |
| OPIOIDS  | tramadol                         | 1140864992      | N02AX02                   | Tramadol                                          |
| OPIOIDS  | zydol 50mg capsule               | 1140865000      | N02AX02                   | Tramadol                                          |
| OPIOIDS  | zamadol 50mg capsule             | 1140928742      | N02AX02                   | Tramadol                                          |
| OPIOIDS  | zamadol sr 100mg m/r capsule     | 1141153424      | N02AX02                   | Tramadol                                          |
| OPIOIDS  | zydol sr 100mg m/r tablet        | 1140922636      | N02AX02                   | Tramadol                                          |
| OPIOIDS  | zydol soluble 50mg tablet        | 1140928372      | N02AX02                   | Morphine                                          |
| OPIOIDS  | meptazinol                       | 1140881026      | N02AX05                   | Meptazinol Hydrochloride                          |
| OPIOIDS  | meptid 200mg tablet              | 1140881028      | N02AX05                   | Meptazinol Hydrochloride                          |
| OPIOIDS  | paracetamol+tramadol             | 1141190956      | N02AX52                   | Tramadol  Acetaminophen                           |
| NSAID    | indocid 25mg capsule             | 1140871354      | M01AB01                   | Indomethacin                                      |
| NSAID    | sulindac                         | 1140871604      | M01AB02                   | Sulindac                                          |
| NSAID    | dicloflex 25mg e/c tablet        | 1140921828      | M01AB05                   | Diclofenac                                        |
| NSAID    | voltarol 25mg e/c tablet         | 1140871168      | M01AB05                   | Diclofenac                                        |
| NSAID    | diclomax sr 75mg m/r capsule     | 1140917394      | M01AB05                   | Diclofenac                                        |
| NSAID    | rhumalgan 25mg e/c tablet        | 1140871180      | M01AB05                   | Diclofenac                                        |
| NSAID    | volsaid retard 75mg m/r tablet   | 1140923920      | M01AB05                   | Diclofenac                                        |
| NSAID    | motifene 75mg e/c+m/r capsule    | 1140909354      | M01AB05                   | Diclofenac                                        |
| NSAID    | voltaren retard 100mg m/r tablet | 1140877872      | M01AB05                   | Diclofenac                                        |
| NSAID    | fenactol 25mg e/c tablet         | 1141182674      | M01AB05                   | Diclofenac                                        |
| NSAID    | voltarol 100mg suppository       | 1140871174      | M01AB05                   | Diclofenac                                        |
| NSAID    | rheumatac retard 75mg m/r tablet | 1141167426      | M01AB05                   | Diclofenac                                        |
| NSAID    | voltarene lp 100mg m/r tablet    | 1140877874      | M01AB05                   | Diclofenac                                        |
| NSAID    | etodolac                         | 1140871188      | M01AB08                   | Etodolac                                          |
| NSAID    | Iodine 200mg tablet              | 1140871196      | M01AB08                   | Etodolac                                          |
| NSAID    | eccoxolac 300mg capsule          | 1141193170      | M01AB08                   | Etodolac                                          |
| NSAID    | acemetacin                       | 1140875278      | M01AB11                   | Acemetacin                                        |
| NSAID    | ketorolac                        | 1140884558      | M01AB15  S01BC05          | Ketorolac                                         |
| NSAID    | aceclofenac                      | 1140925806      | M01AB16  M02AA25          | Aceclofenac                                       |
| NSAID    | arthrotec tablet                 | 1140871266      | M01AB55                   | Diclofenac  Misoprostol                           |
| NSAID    | arthrotec 50 tablet              | 1140927086      | M01AB55                   | Diclofenac  Misoprostol                           |
| NSAID    | diclofenac sodium+misoprostol    | 1140878036      | M01AB55                   | Diclofenac  Misoprostol                           |
| NSAID    | feldene 10mg capsule             | 1140871672      | M01AC01                   | Piroxicam                                         |
| NSAID    | brexidol 20mg tablet             | 1141169530      | M01AC01                   | Piroxicam                                         |
| NSAID    | piroxicam                        | 1140871666      | M01AC01  M02AA07  S01BC06 | Piroxicam                                         |
| NSAID    | tenoxicam                        | 1140875346      | M01AC02                   | Tenoxicam                                         |
| NSAID    | meloxicam                        | 1140926732      | M01AC06                   | Meloxicam                                         |
| NSAID    | mobic 15mg tablet                | 1140926796      | M01AC06                   | Meloxicam                                         |
| NSAID    | mobic 7.5mg tablet               | 1140926794      | M01AC06                   | Meloxicam                                         |

| Category | Medication                                  | UK Biobank Code | ATC Code                              | Drug Name/ Active Ingredient(s) |
|----------|---------------------------------------------|-----------------|---------------------------------------|---------------------------------|
| NSAID    | nurofen 200mg tablet                        | 1141187776      | M01AE01                               | Ibuprofen                       |
| NSAID    | cuprofen 200mg tablet                       | 1140871388      | M01AE01                               | Ibuprofen                       |
| NSAID    | anadin ibuprofen 200mg tablet               | 1141153134      | M01AE01                               | Ibuprofen                       |
| NSAID    | naprosyn 250mg tablet                       | 1140871472      | M01AE02                               | Naproxen                        |
| NSAID    | oruvail 100 m/r capsule                     | 1140871522      | M01AE03                               | Ketoprofen                      |
| NSAID    | ketoprofen                                  | 1140871506      | M01AE03  M02AA10                      | Ketoprofen                      |
| NSAID    | froben 50mg tablet                          | 1140871238      | M01AE09                               | Flurbiprofen                    |
| NSAID    | flurbiprofen                                | 1140871236      | M01AE09  M02AA19<br> R02AX01  S01BC04 | Flurbiprofen                    |
| NSAID    | surgam 200mg tablet                         | 1140871616      | M01AE11                               | Tiaprofenic Acid                |
| NSAID    | ibuprofen+menthol 5%/3% gel                 | 1140911748      | M01AE51                               | Ibuprofen  Menthol              |
| NSAID    | napratec tablet combination pack            | 1140871638      | M01AE56                               | Naproxen  Misoprostol           |
| NSAID    | naproxen+misoprostol                        | 1140881612      | M01AE56                               | Naproxen  Misoprostol           |
| NSAID    | mefenamic acid                              | 1140871542      | M01AG01                               | Mefenamic Acid                  |
| NSAID    | ponstan 250mg capsule                       | 1140871546      | M01AG01                               | Mefenamic Acid                  |
| NSAID    | tolfenamic acid                             | 1140928840      | M01AG02                               | Tolfenamic Acid                 |
| NSAID    | celebrex 100mg capsule                      | 1141176668      | M01AH01                               | Celecoxib                       |
| NSAID    | celebrex 200mg capsule                      | 1141176670      | M01AH01                               | Celecoxib                       |
| NSAID    | etoricoxib                                  | 1141180140      | M01AH05                               | Etoricoxib                      |
| NSAID    | arcoxia 60mg tablet                         | 1141180148      | M01AH05                               | Etoricoxib                      |
| NSAID    | arcoxia 90mg tablet                         | 1141180150      | M01AH05                               | Etoricoxib                      |
| NSAID    | arcoxia 120mg tablet                        | 1141180152      | M01AH05                               | Etoricoxib                      |
| NSAID    | nabumetone                                  | 1140875336      | M01AX01                               | Nabumetone                      |
| NSAID    | relifex 500mg tablet                        | 1140875338      | M01AX01                               | Nabumetone                      |
| NSAID    | glucosamine product                         | 1141188442      | M01AX05                               | Glucosamine                     |
| NSAID    | chondroitin product                         | 1187            | M01AX25                               | Chondroitin Sulfate             |
| ANILIDES | paracetamol                                 | 2038460150      | N02BE01                               | Acetaminophen                   |
| ANILIDES | paracetamol product                         | 1140868240      | N02BE01                               | Acetaminophen                   |
| ANILIDES | anadin paracetamol 500mg tablet             | 1141188516      | N02BE01                               | Acetaminophen                   |
| ANILIDES | panadol 500mg tablet                        | 1140856240      | N02BE01                               | Acetaminophen                   |
| ANILIDES | panadol 500mg capsule                       | 1140856238      | N02BE01                               | Acetaminophen                   |
| ANILIDES | hedex tablet                                | 1140911758      | N02BE01                               | Acetaminophen                   |
| ANILIDES | paramax tablet                              | 1140872036      | N02BE51                               | Acetaminophen  Metoclopramide   |
| ANILIDES | solpadeine headache soluble tablet          | 1141189068      | N02BE51                               | Caffeine  Acetaminophen         |
| ANILIDES | non-drowsy sinutab tablet                   | 1141188512      | N02BE51                               | Acetaminophen  Pseudoephedrine  |
| ANILIDES | sudafed dual relief capsule                 | 1141171672      | N02BE51                               | Acetaminophen  Phenylephrine    |
| ANILIDES | lemsip sachet                               | 1140911762      | N02BE51                               | Acetaminophen  Phenylephrine    |
| ANILIDES | panadol extra tablet                        | 1141168646      | N02BE51                               | Caffeine  Acetaminophen         |
| ANILIDES | solpadeine headache tablet                  | 1141189066      | N02BE51                               | Caffeine  Acetaminophen         |
| ANILIDES | paracetamol+caffeine                        | 1140884404      | N02BE51                               | Caffeine  Acetaminophen         |
| ANILIDES | midrid capsule                              | 1140871966      | N02BE51                               | Acetaminophen  Isometheptene    |
| ANILIDES | paracetamol+metoclopramide 500mg/5mg tablet | 1140872044      | N02BE51                               | Acetaminophen  Metoclopramide   |

| Category       | Medication                                  | UK Biobank Code | ATC Code | Drug Name/ Active Ingredient(s)                       |
|----------------|---------------------------------------------|-----------------|----------|-------------------------------------------------------|
| SALICYLIC ACID | aspro clear maximum strength soluble tablet | 1140909480      | N02BA01  | Acetylsalicylic Acid                                  |
| SALICYLIC ACID | disprin direct dispersible tablet           | 1140882192      | N02BA01  | Acetylsalicylic Acid                                  |
| SALICYLIC ACID | anadin tablet                               | 1140911754      | N02BA51  | Caffeine  Acetylsalicylic Acid                        |
| SALICYLIC ACID | beechams powder                             | 1140911760      | N02BA51  | Caffeine  Acetylsalicylic Acid                        |
| SALICYLIC ACID | alka-seltzer tablet                         | 1140917114      | N02BA51  | Acetylsalicylic Acid  Sodium Bicarbonate  Citric Acid |
| SALICYLIC ACID | migramax sachet powder                      | 1141175756      | N02BA51  | Acetylsalicylic Acid  Metoclopramide                  |
|                |                                             |                 |          |                                                       |

|                                                                    |
|--------------------------------------------------------------------|
| <b>Abbreviations:</b>                                              |
| NSAIDS: Anti-inflammatory and antirheumatic products, non-steroids |
| SALICYLIC ACID: Salicylic acid and derivatives                     |
| Anatomical Therapeutic Chemical Classification System              |

**eTable 3. Independent Instruments for Prescription Opioid Use: Harmonized Data**

| SNP                     | CHR | POS       | EA | OA | PAL | F     | EXPOSURE:  |       |       |          | OUTCOMES: |       |         |        |       |          |
|-------------------------|-----|-----------|----|----|-----|-------|------------|-------|-------|----------|-----------|-------|---------|--------|-------|----------|
|                         |     |           |    |    |     |       | OPIOID USE |       |       |          | MDD       |       |         | ASRD   |       |          |
|                         |     |           |    |    |     |       | beta       | eaf   | se    | P-value  | beta      | se    | P-value | beta   | se    | P-value  |
| rs138200696             | 1   | 117727725 | C  | A  | F   | 21.95 | 0.199      | 0.016 | 0.042 | 2.80E-06 | 0.044     | 0.044 | 0.32    | 0.211  | 0.079 | 0.008    |
| rs2618039               | 1   | 112324111 | T  | A  | T   | 30.57 | 0.061      | 0.381 | 0.011 | 3.20E-08 | 0.007     | 0.009 | 0.47    | 0.007  | 0.018 | 0.68     |
| rs945211                | 1   | 32191798  | G  | C  | T   | 21.71 | -0.051     | 0.383 | 0.011 | 3.20E-06 | 0.010     | 0.010 | 0.30    | 0.000  | 0.019 | 0.99     |
| rs138405014             | 2   | 221947203 | A  | G  | F   | 21.01 | -0.218     | 0.013 | 0.048 | 4.60E-06 | 0.028     | 0.052 | 0.59    | 0.044  | 0.056 | 0.43     |
| rs139152977             | 2   | 199098906 | A  | T  | F   | 22.69 | 0.164      | 0.025 | 0.034 | 1.90E-06 | 0.010     | 0.030 | 0.74    | -0.022 | 0.018 | 0.23     |
| rs140729888             | 3   | 10521537  | C  | T  | F   | 21.11 | -0.205     | 0.015 | 0.045 | 4.30E-06 | -0.087    | 0.036 | 0.01    | 0.010  | 0.019 | 0.58     |
| rs521956                | 3   | 173117975 | T  | C  | F   | 25.22 | -0.054     | 0.483 | 0.011 | 5.10E-07 | -0.010    | 0.009 | 0.30    | -0.011 | 0.018 | 0.54     |
| rs7428430               | 3   | 50174184  | T  | C  | F   | 37.00 | -0.065     | 0.483 | 0.011 | 1.20E-09 | -0.012    | 0.009 | 0.19    | -0.037 | 0.017 | 0.04     |
| rs7631941               | 3   | 80480052  | T  | C  | F   | 20.87 | 0.073      | 0.131 | 0.016 | 4.90E-06 | -0.016    | 0.014 | 0.24    | 0.008  | 0.027 | 0.77     |
| rs13135092              | 4   | 103198082 | G  | A  | F   | 25.19 | 0.099      | 0.081 | 0.020 | 5.20E-07 | -0.019    | 0.019 | 0.31    | 0.003  | 0.040 | 0.94     |
| rs1397440               | 4   | 140892872 | T  | C  | F   | 21.51 | -0.053     | 0.325 | 0.012 | 3.50E-06 | -0.022    | 0.010 | 0.02    | 0.006  | 0.059 | 0.92     |
| rs76034781              | 4   | 3272782   | A  | G  | F   | 23.52 | 0.098      | 0.077 | 0.020 | 1.20E-06 | 0.038     | 0.021 | 0.07    | 0.096  | 0.031 | 0.002    |
| rs11743674              | 5   | 151418837 | C  | G  | T   | 22.07 | 0.061      | 0.222 | 0.013 | 2.60E-06 | 0.007     | 0.011 | 0.53    | 0.010  | 0.021 | 0.64     |
| rs56226325 <sup>b</sup> | 7   | 2078981   | T  | C  | F   | 25.30 | -0.074     | 0.155 | 0.015 | 4.90E-07 | -0.035    | 0.012 | 0.004   | -0.081 | 0.024 | 6.41E-04 |
| rs117710046             | 8   | 59430010  | T  | C  | F   | 23.64 | 0.210      | 0.016 | 0.043 | 1.20E-06 | 0.008     | 0.031 | 0.80    | -0.024 | 0.056 | 0.68     |
| rs1519369               | 8   | 139393909 | T  | C  | F   | 21.24 | -0.053     | 0.327 | 0.012 | 4.00E-06 | -0.001    | 0.010 | 0.91    | -0.015 | 0.018 | 0.41     |
| rs12238134              | 9   | 128746612 | A  | G  | F   | 37.71 | -0.071     | 0.305 | 0.012 | 8.20E-10 | -0.003    | 0.010 | 0.75    | -0.023 | 0.019 | 0.24     |
| rs17487601              | 9   | 37213641  | A  | G  | F   | 24.42 | -0.055     | 0.356 | 0.011 | 7.70E-07 | -0.005    | 0.010 | 0.62    | 0.015  | 0.028 | 0.60     |
| rs7860752               | 9   | 81389671  | G  | A  | F   | 26.01 | 0.069      | 0.193 | 0.014 | 3.40E-07 | 0.014     | 0.011 | 0.23    | 0.044  | 0.021 | 0.04     |
| rs12357321              | 10  | 21790476  | A  | G  | F   | 29.05 | 0.063      | 0.312 | 0.012 | 7.10E-08 | -0.001    | 0.010 | 0.95    | 0.002  | 0.019 | 0.89     |
| rs4258296               | 10  | 134953361 | C  | T  | F   | 24.76 | 0.056      | 0.363 | 0.011 | 6.50E-07 | 0.011     | 0.011 | 0.32    | 0.024  | 0.019 | 0.22     |
| rs7110825               | 11  | 46120317  | C  | T  | F   | 22.32 | 0.057      | 0.270 | 0.012 | 2.30E-06 | 0.014     | 0.010 | 0.18    | 0.011  | 0.019 | 0.56     |
| rs4763505               | 12  | 10477712  | T  | A  | T   | 21.04 | -0.053     | 0.317 | 0.012 | 4.50E-06 | -0.011    | 0.010 | 0.29    | -0.037 | 0.020 | 0.06     |

|             |     |          |    |    |     |       | EXPOSURE:  |       |       |          | OUTCOMES: |       |         |        |       |         |
|-------------|-----|----------|----|----|-----|-------|------------|-------|-------|----------|-----------|-------|---------|--------|-------|---------|
|             |     |          |    |    |     |       | OPIOID USE |       |       |          | MDD       |       |         | ASRD   |       |         |
| SNP         | CHR | POS      | EA | OA | PAL | F     | beta       | eaf   | se    | P-value  | beta      | se    | P-value | beta   | se    | P-value |
| rs56262049  | 13  | 42644705 | C  | T  | F   | 22.20 | -0.066     | 0.182 | 0.014 | 2.50E-06 | -0.011    | 0.012 | 0.35    | -0.026 | 0.022 | 0.25    |
| rs7319102   | 13  | 58252801 | G  | A  | F   | 22.22 | 0.060      | 0.229 | 0.013 | 2.40E-06 | 0.012     | 0.011 | 0.28    | 0.051  | 0.020 | 0.01    |
| rs7154623   | 14  | 73798243 | G  | A  | F   | 22.25 | 0.064      | 0.193 | 0.014 | 2.40E-06 | -0.012    | 0.011 | 0.31    | -0.030 | 0.022 | 0.18    |
| rs113544339 | 15  | 86576076 | G  | T  | F   | 21.47 | -0.166     | 0.023 | 0.036 | 3.60E-06 | -0.047    | 0.031 | 0.13    | -0.067 | 0.061 | 0.27    |
| rs2289739   | 15  | 41801512 | T  | G  | F   | 22.62 | 0.054      | 0.343 | 0.011 | 2.00E-06 | 0.009     | 0.010 | 0.36    | -0.010 | 0.018 | 0.59    |
| rs75169822  | 15  | 75887405 | G  | A  | F   | 23.40 | 0.059      | 0.262 | 0.012 | 1.30E-06 | -0.010    | 0.010 | 0.33    | -0.001 | 0.019 | 0.97    |
| rs975376    | 16  | 73100503 | C  | G  | T   | 23.87 | 0.071      | 0.164 | 0.015 | 1.00E-06 | -0.006    | 0.013 | 0.65    | 0.014  | 0.025 | 0.58    |
| rs59695806  | 17  | 43156023 | C  | T  | F   | 23.80 | 0.057      | 0.294 | 0.012 | 1.10E-06 | 0.011     | 0.010 | 0.29    | -0.011 | 0.019 | 0.57    |
| rs2297197   | 20  | 44673546 | G  | C  | T   | 24.44 | 0.060      | 0.281 | 0.012 | 7.70E-07 | 0.028     | 0.010 | 0.006   | 0.028  | 0.020 | 0.15    |
| rs6141277   | 20  | 30831157 | C  | G  | T   | 22.40 | 0.052      | 0.392 | 0.011 | 2.20E-06 | 0.006     | 0.009 | 0.52    | 0.045  | 0.017 | 0.009   |
| rs73228014  | 21  | 42752754 | A  | G  | F   | 21.38 | 0.161      | 0.024 | 0.035 | 3.80E-06 | 0.010     | 0.052 | 0.85    | NA     | NA    | NA      |
|             |     |          |    |    |     |       |            |       |       |          |           |       |         |        |       |         |

<sup>a</sup> Identified as potentially invalid instrument due to reverse causation by Steiger filtering for exposure on outcome MDD.

<sup>b</sup> Identified as potentially invalid instrument due to reverse causation by Steiger filtering for exposure on outcome ASRD.

**Abbreviations:**

MDD: Major depressive disorder/ major depression outcome  
ASRD: Anxiety and stress-related disorders outcome  
SNP: Single nucleotide polymorphism - genetic instrument  
CHR: Chromosome  
POS: Position  
beta: SNP effect of effect allele  
se: standard error of SNP effect  
P-value: P-value associated with SNP effect

N: GWAS sample size  
EA: effect allele  
OA: other allele  
PAL: palindromic (true or false)  
F: F-statistic for the instrument.

**eTable 4. Independent Instruments for Salicylic Acid Use: Harmonized Data**

| SNP                     | CHR | POS       | EA | OA | PAL | F     | EXPOSURE:          |       |       |          | OUTCOMES: |       |          |        |       |          |
|-------------------------|-----|-----------|----|----|-----|-------|--------------------|-------|-------|----------|-----------|-------|----------|--------|-------|----------|
|                         |     |           |    |    |     |       | SALICYLIC ACID USE |       |       |          | MDD       |       |          | ASRD   |       |          |
|                         |     |           |    |    |     |       | beta               | eaf   | se    | P-value  | beta      | se    | P-value  | beta   | se    | P-value  |
| rs10218528              | 1   | 174447588 | A  | T  | T   | 25.45 | -0.041             | 0.393 | 0.008 | 4.50E-07 | -0.004    | 0.010 | 0.67     | -0.004 | 0.018 | 0.83     |
| rs11206268              | 1   | 54445348  | G  | A  | F   | 22.38 | -0.075             | 0.066 | 0.016 | 2.20E-06 | -0.015    | 0.018 | 0.39     | 0.002  | 0.033 | 0.96     |
| rs113242618             | 1   | 234118046 | A  | G  | F   | 21.59 | -0.154             | 0.014 | 0.033 | 3.40E-06 | -0.011    | 0.039 | 0.77     | 0.086  | 0.086 | 0.31     |
| rs583104                | 1   | 109821307 | G  | T  | F   | 67.95 | -0.078             | 0.225 | 0.009 | 1.70E-16 | 0.018     | 0.011 | 0.10     | -0.010 | 0.020 | 0.61     |
| rs4299376               | 2   | 44072576  | G  | T  | F   | 28.66 | 0.045              | 0.324 | 0.008 | 8.60E-08 | 0.002     | 0.010 | 0.85     | -0.011 | 0.019 | 0.57     |
| rs896232                | 2   | 2732877   | T  | C  | F   | 23.18 | -0.040             | 0.361 | 0.008 | 1.50E-06 | -0.020    | 0.010 | 0.04     | -0.015 | 0.019 | 0.41     |
| rs13082582              | 3   | 170202670 | C  | G  | T   | 23.59 | 0.039              | 0.403 | 0.008 | 1.20E-06 | -0.001    | 0.010 | 0.96     | 0.019  | 0.018 | 0.30     |
| rs9865841 <sup>b</sup>  | 3   | 135876125 | A  | G  | F   | 22.31 | -0.045             | 0.222 | 0.010 | 2.30E-06 | -0.014    | 0.012 | 0.23     | -0.067 | 0.022 | 0.002    |
| rs1825548               | 4   | 20150967  | T  | A  | T   | 21.31 | 0.055              | 0.124 | 0.012 | 3.90E-06 | 0.004     | 0.015 | 0.78     | 0.044  | 0.027 | 0.11     |
| rs12188010 <sup>b</sup> | 5   | 166996466 | A  | T  | T   | 23.60 | 0.040              | 0.376 | 0.008 | 1.20E-06 | 0.034     | 0.009 | 3.56E-04 | 0.059  | 0.018 | 8.82E-04 |
| rs117733303             | 6   | 160922870 | G  | A  | F   | 42.05 | 0.185              | 0.020 | 0.028 | 8.90E-11 | 0.013     | 0.037 | 0.73     | -0.012 | 0.088 | 0.89     |
| rs1931656               | 6   | 82610188  | A  | T  | T   | 21.29 | 0.037              | 0.456 | 0.008 | 4.00E-06 | -0.002    | 0.009 | 0.85     | 0.005  | 0.017 | 0.79     |
| rs2523589               | 6   | 31327334  | T  | G  | F   | 31.39 | 0.044              | 0.495 | 0.008 | 2.10E-08 | 0.041     | 0.024 | 0.09     | 0.043  | 0.017 | 0.01     |
| rs74617384              | 6   | 160997118 | T  | A  | T   | 53.41 | 0.105              | 0.083 | 0.014 | 2.70E-13 | 0.008     | 0.018 | 0.65     | -0.005 | 0.033 | 0.88     |
| rs56226325 <sup>b</sup> | 7   | 2078981   | T  | C  | F   | 26.86 | -0.057             | 0.155 | 0.011 | 2.20E-07 | -0.035    | 0.012 | 0.004    | -0.081 | 0.024 | 6.41E-04 |
| rs28601761              | 8   | 126500031 | G  | C  | T   | 54.84 | -0.061             | 0.415 | 0.008 | 1.30E-13 | -0.005    | 0.009 | 0.58     | 0.000  | 0.017 | 0.99     |
| rs75278536              | 8   | 19821425  | G  | T  | F   | 27.45 | -0.067             | 0.106 | 0.013 | 1.60E-07 | 0.001     | 0.015 | 0.96     | 0.011  | 0.028 | 0.69     |
| rs75786943              | 8   | 97103955  | C  | G  | T   | 22.98 | 0.149              | 0.016 | 0.031 | 1.60E-06 | -0.003    | 0.038 | 0.93     | -0.038 | 0.081 | 0.64     |
| rs1831733               | 9   | 22076071  | C  | T  | F   | 32.96 | 0.046              | 0.483 | 0.008 | 9.40E-09 | 0.019     | 0.010 | 0.04     | 0.012  | 0.018 | 0.51     |
| rs635634                | 9   | 136155000 | T  | C  | F   | 42.40 | 0.067              | 0.185 | 0.010 | 7.40E-11 | -0.004    | 0.012 | 0.71     | 0.030  | 0.022 | 0.16     |
| rs10508267              | 10  | 3846959   | C  | G  | T   | 22.01 | -0.039             | 0.359 | 0.008 | 2.70E-06 | 0.008     | 0.010 | 0.41     | -0.025 | 0.019 | 0.18     |
| rs10887793              | 10  | 89990905  | T  | G  | F   | 28.30 | 0.043              | 0.448 | 0.008 | 1.00E-07 | 0.002     | 0.011 | 0.88     | 0.023  | 0.019 | 0.24     |
| rs59681006              | 11  | 70179401  | C  | T  | F   | 22.87 | -0.057             | 0.130 | 0.012 | 1.70E-06 | 0.009     | 0.014 | 0.49     | 0.019  | 0.026 | 0.45     |

|             |     |           |    |    |     |       | EXPOSURE:          |       |       |          | OUTCOMES: |       |         |        |       |         |
|-------------|-----|-----------|----|----|-----|-------|--------------------|-------|-------|----------|-----------|-------|---------|--------|-------|---------|
|             |     |           |    |    |     |       | SALICYLIC ACID USE |       |       |          | MDD       |       |         | ASRD   |       |         |
| SNP         | CHR | POS       | EA | OA | PAL | F     | beta               | eaf   | se    | P-value  | beta      | se    | P-value | beta   | se    | P-value |
| rs77507211  | 11  | 24918930  | T  | G  | F   | 20.91 | 0.137              | 0.018 | 0.030 | 4.80E-06 | 0.034     | 0.044 | 0.43    | NA     | NA    | NA      |
| rs964184    | 11  | 116648917 | G  | C  | T   | 29.77 | 0.063              | 0.134 | 0.012 | 4.90E-08 | 0.001     | 0.013 | 0.96    | -0.016 | 0.025 | 0.53    |
| rs113551213 | 12  | 12513870  | A  | G  | F   | 21.21 | 0.085              | 0.050 | 0.018 | 4.10E-06 | -0.012    | 0.024 | 0.61    | 0.075  | 0.048 | 0.12    |
| rs12580718  | 12  | 67407656  | A  | G  | F   | 22.38 | -0.039             | 0.367 | 0.008 | 2.20E-06 | -0.011    | 0.009 | 0.25    | 0.003  | 0.018 | 0.87    |
| rs7315004   | 12  | 31928182  | A  | T  | T   | 25.42 | -0.041             | 0.419 | 0.008 | 4.60E-07 | 0.018     | 0.009 | 0.06    | 0.026  | 0.018 | 0.14    |
| rs1960743   | 13  | 83832609  | A  | G  | F   | 21.26 | 0.059              | 0.109 | 0.013 | 4.00E-06 | -0.032    | 0.015 | 0.03    | 0.001  | 0.028 | 0.97    |
| rs4995008   | 13  | 106831286 | A  | G  | F   | 21.13 | 0.054              | 0.131 | 0.012 | 4.30E-06 | 0.007     | 0.013 | 0.60    | 0.017  | 0.026 | 0.49    |
| rs950100    | 14  | 42971842  | A  | G  | F   | 21.06 | -0.072             | 0.069 | 0.016 | 4.50E-06 | -0.004    | 0.019 | 0.81    | 0.001  | 0.035 | 0.97    |
| rs185197153 | 16  | 58450949  | C  | A  | F   | 22.12 | -0.163             | 0.013 | 0.035 | 2.60E-06 | 0.007     | 0.035 | 0.85    | 0.005  | 0.017 | 0.79    |
| rs11874619  | 18  | 46500936  | C  | G  | T   | 21.61 | -0.039             | 0.388 | 0.008 | 3.30E-06 | -0.013    | 0.010 | 0.16    | -0.014 | 0.018 | 0.43    |
| rs7244655   | 18  | 67986087  | A  | G  | F   | 22.38 | -0.043             | 0.248 | 0.009 | 2.20E-06 | -0.017    | 0.011 | 0.12    | -0.010 | 0.020 | 0.62    |
| rs73015016  | 19  | 11191300  | A  | G  | F   | 60.77 | -0.096             | 0.118 | 0.012 | 6.40E-15 | -0.012    | 0.015 | 0.40    | -0.016 | 0.028 | 0.58    |
| rs7412      | 19  | 45412079  | T  | C  | F   | 56.77 | -0.111             | 0.078 | 0.015 | 4.90E-14 | -0.002    | 0.019 | 0.94    | -0.010 | 0.031 | 0.74    |
| rs117571676 | 20  | 21002369  | A  | T  | T   | 21.78 | -0.133             | 0.020 | 0.029 | 3.10E-06 | 0.003     | 0.033 | 0.92    | 0.015  | 0.057 | 0.80    |
| rs9982261   | 21  | 17528955  | A  | G  | F   | 21.62 | -0.175             | 0.011 | 0.038 | 3.30E-06 | 0.035     | 0.051 | 0.49    | NA     | NA    | NA      |
| rs139696858 | 22  | 47836888  | A  | G  | F   | 23.05 | -0.164             | 0.014 | 0.034 | 1.60E-06 | 0.018     | 0.044 | 0.69    | NA     | NA    | NA      |
| rs9612563   | 22  | 24597540  | C  | A  | F   | 21.92 | -0.080             | 0.058 | 0.017 | 2.80E-06 | 0.001     | 0.019 | 0.94    | -0.027 | 0.037 | 0.47    |

<sup>a</sup> Identified as potentially invalid instrument due to reverse causation by Steiger filtering for exposure on outcome MDD.

<sup>b</sup> Identified as potentially invalid instrument due to reverse causation by Steiger filtering for exposure on outcome ASRD.

| Abbreviations:                                           |
|----------------------------------------------------------|
| MDD: Major depressive disorder/ major depression outcome |
| ASRD: Anxiety and stress-related disorders outcome       |
| SNP: Single nucleotide polymorphism - genetic instrument |
| CHR: Chromosome                                          |
| POS: Position                                            |
| beta: SNP effect                                         |
| se: standard error of SNP effect                         |
| P-value: P-value associated with SNP effect              |
| N: GWAS sample size                                      |
| EA: effect allele                                        |



OA: other allele  
PAL: palindromic (true or false)  
F: F-statistic for the instrument.

**eTable 5. Independent Instruments for Anilides Use: Harmonized Data**

| SNP                    | CHR | POS       | EA | OA | PAL | F     | EXPOSURE:   |       |       |          | OUTCOMES: |       |          |        |       |         |
|------------------------|-----|-----------|----|----|-----|-------|-------------|-------|-------|----------|-----------|-------|----------|--------|-------|---------|
|                        |     |           |    |    |     |       | ANILIDE USE |       |       |          | ASRD      |       | MDD      |        |       |         |
|                        |     |           |    |    |     |       | beta        | eaf   | se    | P-value  | beta      | se    | P-value  | beta   | se    | P-value |
| rs10158289             | 1   | 174050667 | G  | A  | F   | 24.58 | -0.033      | 0.450 | 0.007 | 7.10E-07 | -0.012    | 0.018 | 0.51     | -0.005 | 0.009 | 0.60    |
| rs1050316              | 1   | 156434703 | G  | T  | F   | 27.27 | 0.036       | 0.348 | 0.007 | 1.80E-07 | -0.028    | 0.018 | 0.13     | -0.009 | 0.010 | 0.35    |
| rs11807461             | 1   | 153832768 | A  | T  | T   | 22.58 | -0.060      | 0.073 | 0.013 | 2.00E-06 | 0.035     | 0.037 | 0.34     | 0.015  | 0.019 | 0.43    |
| rs1476901              | 1   | 187760345 | C  | T  | F   | 21.62 | -0.031      | 0.456 | 0.007 | 3.30E-06 | -0.013    | 0.018 | 0.46     | -0.004 | 0.009 | 0.71    |
| rs41272663             | 2   | 211302627 | A  | C  | F   | 22.21 | -0.035      | 0.262 | 0.007 | 2.40E-06 | -0.005    | 0.021 | 0.79     | 0.002  | 0.011 | 0.81    |
| rs62180637             | 2   | 217424243 | C  | T  | F   | 22.76 | -0.031      | 0.466 | 0.007 | 1.80E-06 | 0.006     | 0.018 | 0.72     | -0.020 | 0.009 | 0.03    |
| rs685139               | 2   | 234758539 | C  | T  | F   | 25.97 | -0.061      | 0.080 | 0.012 | 3.50E-07 | 0.053     | 0.030 | 0.08     | 0.019  | 0.016 | 0.23    |
| rs74335824             | 2   | 242452616 | T  | C  | F   | 20.96 | 0.041       | 0.166 | 0.009 | 4.70E-06 | -0.020    | 0.025 | 0.41     | 0.004  | 0.013 | 0.79    |
| rs1264194              | 3   | 48625266  | T  | C  | F   | 21.32 | 0.034       | 0.284 | 0.007 | 3.90E-06 | -0.012    | 0.020 | 0.53     | 0.006  | 0.011 | 0.58    |
| rs4356969              | 4   | 112302592 | C  | G  | T   | 23.32 | -0.036      | 0.264 | 0.008 | 1.40E-06 | -0.039    | 0.021 | 0.06     | -0.013 | 0.011 | 0.24    |
| rs62305543             | 4   | 87217713  | C  | T  | F   | 23.85 | 0.033       | 0.376 | 0.007 | 1.00E-06 | -0.013    | 0.018 | 0.47     | -0.005 | 0.009 | 0.57    |
| rs62315620             | 4   | 67719607  | T  | C  | F   | 21.52 | 0.035       | 0.255 | 0.008 | 3.50E-06 | 0.003     | 0.021 | 0.89     | 0.006  | 0.011 | 0.54    |
| rs62378567             | 5   | 173106225 | G  | A  | F   | 23.87 | -0.116      | 0.019 | 0.024 | 1.00E-06 | 0.024     | 0.080 | 0.77     | 0.037  | 0.038 | 0.34    |
| rs11242905             | 6   | 474405    | C  | T  | F   | 21.14 | 0.045       | 0.127 | 0.010 | 4.30E-06 | -0.033    | 0.026 | 0.21     | -0.011 | 0.014 | 0.42    |
| rs4236040              | 6   | 25761209  | T  | C  | F   | 22.27 | -0.049      | 0.111 | 0.010 | 2.40E-06 | -0.039    | 0.029 | 0.18     | -0.038 | 0.016 | 0.02    |
| rs6456469              | 6   | 22107290  | G  | A  | F   | 21.95 | 0.031       | 0.455 | 0.007 | 2.80E-06 | 0.025     | 0.018 | 0.16     | -0.005 | 0.009 | 0.62    |
| rs9399923 <sup>b</sup> | 6   | 96850379  | G  | A  | F   | 20.93 | 0.036       | 0.219 | 0.008 | 4.80E-06 | 0.072     | 0.021 | 4.64E-04 | 0.007  | 0.011 | 0.55    |
| rs4415205              | 7   | 67214927  | A  | G  | F   | 21.76 | 0.041       | 0.172 | 0.009 | 3.10E-06 | -0.016    | 0.023 | 0.49     | 0.004  | 0.012 | 0.74    |
| rs73168813             | 7   | 135846513 | C  | G  | NA  | 22.49 | 0.106       | 0.022 | 0.022 | 2.10E-06 | NA        | NA    | NA       | -0.052 | 0.045 | 0.25    |
| rs4741328              | 9   | 13764507  | C  | T  | F   | 23.74 | -0.033      | 0.368 | 0.007 | 1.10E-06 | 0.019     | 0.018 | 0.30     | -0.008 | 0.010 | 0.43    |
| rs73531210             | 9   | 112519447 | T  | C  | F   | 22.14 | -0.070      | 0.051 | 0.015 | 2.50E-06 | 0.001     | 0.039 | 0.98     | 0.006  | 0.020 | 0.74    |
| rs1648372              | 11  | 115893928 | T  | G  | F   | 22.04 | -0.046      | 0.126 | 0.010 | 2.70E-06 | -0.016    | 0.030 | 0.59     | -0.029 | 0.015 | 0.05    |
| rs725957               | 12  | 57331741  | A  | G  | F   | 32.43 | 0.039       | 0.395 | 0.007 | 1.20E-08 | 0.008     | 0.018 | 0.64     | 0.009  | 0.009 | 0.32    |

| SNP                    | CHR | POS      | EA | OA | PAL | F     | EXPOSURE: |       |       |          | OUTCOMES: |       |         |        |       |         |
|------------------------|-----|----------|----|----|-----|-------|-----------|-------|-------|----------|-----------|-------|---------|--------|-------|---------|
|                        |     |          |    |    |     |       | beta      | eaf   | se    | P-value  | ASRD      |       | MDD     |        |       |         |
|                        |     |          |    |    |     |       |           |       |       |          | beta      | se    | P-value | beta   | se    | P-value |
| rs1413124              | 13  | 59210253 | C  | G  | T   | 20.95 | 0.035     | 0.247 | 0.008 | 4.70E-06 | 0.023     | 0.020 | 0.24    | 0.006  | 0.010 | 0.58    |
| rs9571576              | 13  | 66936133 | C  | T  | F   | 23.60 | 0.032     | 0.494 | 0.007 | 1.20E-06 | 0.024     | 0.017 | 0.16    | 0.013  | 0.009 | 0.16    |
| rs17128721             | 14  | 93462039 | A  | C  | F   | 22.46 | 0.066     | 0.060 | 0.014 | 2.20E-06 | 0.023     | 0.039 | 0.56    | -0.016 | 0.020 | 0.44    |
| rs2803966              | 14  | 73100786 | C  | T  | F   | 21.07 | -0.030    | 0.472 | 0.007 | 4.40E-06 | 0.017     | 0.017 | 0.32    | 0.006  | 0.009 | 0.49    |
| rs12905100             | 15  | 74601813 | G  | A  | F   | 21.66 | -0.032    | 0.363 | 0.007 | 3.30E-06 | 0.004     | 0.018 | 0.84    | 0.002  | 0.010 | 0.80    |
| rs2947009 <sup>b</sup> | 15  | 46300580 | A  | T  | T   | 21.55 | 0.031     | 0.490 | 0.007 | 3.40E-06 | 0.051     | 0.019 | 0.006   | 0.009  | 0.010 | 0.33    |
| rs80114555             | 16  | 54597818 | A  | G  | F   | 21.02 | -0.096    | 0.025 | 0.021 | 4.50E-06 | -0.059    | 0.077 | 0.45    | -0.063 | 0.034 | 0.06    |
| rs9302806              | 16  | 5793163  | A  | G  | F   | 22.74 | 0.031     | 0.424 | 0.007 | 1.90E-06 | -0.005    | 0.017 | 0.78    | 0.004  | 0.009 | 0.63    |
| rs2239936              | 17  | 10535349 | C  | G  | T   | 23.89 | 0.041     | 0.185 | 0.008 | 1.00E-06 | 0.016     | 0.022 | 0.47    | 0.011  | 0.012 | 0.36    |
| rs73998427             | 17  | 70840296 | T  | C  | F   | 21.90 | 0.088     | 0.031 | 0.019 | 2.90E-06 | -0.005    | 0.056 | 0.93    | 0.039  | 0.027 | 0.15    |
| rs1261097              | 18  | 52868977 | G  | T  | F   | 23.80 | 0.035     | 0.300 | 0.007 | 1.10E-06 | 0.028     | 0.019 | 0.13    | 0.023  | 0.010 | 0.02    |
| rs6141314              | 20  | 31093514 | A  | G  | F   | 22.60 | 0.037     | 0.242 | 0.008 | 2.00E-06 | 0.035     | 0.020 | 0.08    | 0.011  | 0.011 | 0.29    |
| rs4271845              | 21  | 20164265 | C  | G  | T   | 21.87 | 0.031     | 0.433 | 0.007 | 2.90E-06 | 0.020     | 0.017 | 0.26    | 0.019  | 0.009 | 0.04    |

<sup>a</sup> Identified as potentially invalid instrument due to reverse causation by Steiger filtering for exposure on outcome MDD.

<sup>b</sup> Identified as potentially invalid instrument due to reverse causation by Steiger filtering for exposure on outcome ASRD.

| Abbreviations:                                           |
|----------------------------------------------------------|
| MDD: Major depressive disorder/ major depression outcome |
| ASRD: Anxiety and stress-related disorders outcome       |
| SNP: Single nucleotide polymorphism - genetic instrument |
| CHR: Chromosome                                          |
| POS: Position                                            |
| beta: SNP effect                                         |
| se: standard error of SNP effect                         |
| P-value: P-value associated with SNP effect              |
| N: GWAS sample size                                      |
| EA: effect allele                                        |
| OA: other allele                                         |
| PAL: palindromic (true or false)                         |
| F: F-statistic for the instrument.                       |

**eTable 6. Independent Instruments for NSAID Use: Harmonized Data**

| SNP         | CHR | POS       | EA | OA | PAL | F     | EXPOSURE: |       |       |          | OUTCOMES: |       |         |        |       |         |
|-------------|-----|-----------|----|----|-----|-------|-----------|-------|-------|----------|-----------|-------|---------|--------|-------|---------|
|             |     |           |    |    |     |       | NSAID USE |       |       |          | MDD       |       |         | ASRD   |       |         |
|             |     |           |    |    |     |       | beta      | eaf   | se    | P-value  | beta      | se    | P-value | beta   | se    | P-value |
| rs12409445  | 1   | 192403191 | C  | T  | F   | 24.66 | -0.045    | 0.189 | 0.009 | 6.80E-07 | -0.013    | 0.012 | 0.26    | 0.001  | 0.022 | 0.95    |
| rs1632360   | 1   | 154267672 | G  | A  | F   | 27.01 | 0.079     | 0.055 | 0.015 | 2.00E-07 | 0.026     | 0.022 | 0.25    | 0.032  | 0.048 | 0.51    |
| rs3737240   | 1   | 150483355 | T  | C  | F   | 27.28 | -0.037    | 0.395 | 0.007 | 1.80E-07 | 0.003     | 0.009 | 0.77    | -0.013 | 0.017 | 0.46    |
| rs4110942   | 1   | 29337802  | G  | A  | F   | 21.31 | -0.056    | 0.088 | 0.012 | 3.90E-06 | 0.007     | 0.016 | 0.67    | 0.016  | 0.032 | 0.61    |
| rs7532754   | 1   | 115824515 | T  | C  | F   | 22.85 | -0.034    | 0.360 | 0.007 | 1.70E-06 | -0.014    | 0.010 | 0.16    | 0.005  | 0.019 | 0.78    |
| rs3821269   | 2   | 70698590  | A  | G  | F   | 29.39 | 0.038     | 0.498 | 0.007 | 5.90E-08 | 0.015     | 0.009 | 0.10    | 0.036  | 0.017 | 0.04    |
| rs11097493  | 4   | 97020614  | A  | T  | T   | 22.33 | 0.034     | 0.361 | 0.007 | 2.30E-06 | -0.009    | 0.009 | 0.32    | -0.007 | 0.018 | 0.68    |
| rs151415    | 4   | 103137539 | G  | C  | T   | 26.98 | 0.043     | 0.237 | 0.008 | 2.10E-07 | -0.001    | 0.011 | 0.94    | -0.017 | 0.021 | 0.40    |
| rs56166763  | 4   | 140943169 | C  | G  | T   | 32.53 | -0.041    | 0.369 | 0.007 | 1.20E-08 | -0.024    | 0.009 | 0.01    | -0.018 | 0.018 | 0.31    |
| rs7687973   | 4   | 81139104  | C  | T  | F   | 28.38 | -0.044    | 0.224 | 0.008 | 1.00E-07 | -0.016    | 0.011 | 0.14    | -0.018 | 0.021 | 0.39    |
| rs12522598  | 5   | 120174466 | G  | A  | F   | 35.20 | 0.045     | 0.289 | 0.008 | 3.00E-09 | 0.015     | 0.010 | 0.13    | 0.046  | 0.019 | 0.02    |
| rs359431    | 5   | 173288534 | C  | T  | F   | 27.84 | 0.037     | 0.437 | 0.007 | 1.30E-07 | -0.003    | 0.009 | 0.71    | 0.006  | 0.017 | 0.72    |
| rs6891880   | 5   | 149972794 | G  | A  | F   | 29.74 | -0.038    | 0.427 | 0.007 | 4.90E-08 | 0.017     | 0.009 | 0.07    | 0.000  | 0.018 | >0.99   |
| rs114212906 | 6   | 31391389  | T  | C  | F   | 31.80 | 0.092     | 0.047 | 0.016 | 1.70E-08 | -0.002    | 0.022 | 0.93    | -0.029 | 0.040 | 0.47    |
| rs1589738   | 6   | 147967761 | A  | G  | F   | 21.45 | 0.033     | 0.368 | 0.007 | 3.60E-06 | 0.016     | 0.009 | 0.09    | 0.005  | 0.018 | 0.77    |
| rs2237257   | 6   | 112005126 | G  | T  | F   | 23.79 | -0.052    | 0.123 | 0.011 | 1.10E-06 | 0.019     | 0.014 | 0.17    | 0.025  | 0.025 | 0.32    |
| rs11993835  | 8   | 88867707  | A  | G  | F   | 22.88 | -0.049    | 0.134 | 0.010 | 1.70E-06 | -0.009    | 0.014 | 0.50    | 0.004  | 0.027 | 0.88    |
| rs2608029   | 8   | 129170126 | G  | C  | T   | 24.25 | 0.036     | 0.334 | 0.007 | 8.50E-07 | 0.022     | 0.010 | 0.02    | 0.010  | 0.019 | 0.61    |
| rs35990522  | 9   | 119274481 | A  | T  | T   | 22.94 | 0.063     | 0.075 | 0.013 | 1.70E-06 | -0.011    | 0.019 | 0.54    | 0.024  | 0.038 | 0.53    |
| rs71510292  | 9   | 91898790  | C  | T  | F   | 25.13 | 0.082     | 0.048 | 0.016 | 5.40E-07 | -0.010    | 0.026 | 0.70    | 0.039  | 0.044 | 0.37    |
| rs7856204   | 9   | 95173814  | C  | G  | T   | 22.84 | 0.034     | 0.364 | 0.007 | 1.80E-06 | -0.008    | 0.010 | 0.42    | -0.015 | 0.018 | 0.40    |
| rs113041162 | 10  | 71106964  | A  | G  | F   | 26.10 | 0.050     | 0.147 | 0.010 | 3.20E-07 | -0.010    | 0.013 | 0.44    | 0.010  | 0.025 | 0.68    |
| rs11597763  | 10  | 98244903  | G  | A  | F   | 25.14 | 0.043     | 0.203 | 0.009 | 5.30E-07 | 0.003     | 0.012 | 0.81    | -0.003 | 0.022 | 0.90    |

|             |     |           |    |    |     |       | EXPOSURE: |       |       |          | OUTCOMES: |       |         |        |       |         |
|-------------|-----|-----------|----|----|-----|-------|-----------|-------|-------|----------|-----------|-------|---------|--------|-------|---------|
|             |     |           |    |    |     |       | NSAID USE |       |       |          | MDD       |       |         | ASRD   |       |         |
| SNP         | CHR | POS       | EA | OA | PAL | F     | beta      | eaf   | se    | P-value  | beta      | se    | P-value | beta   | se    | P-value |
| rs12285912  | 11  | 126727315 | G  | A  | F   | 22.86 | 0.103     | 0.026 | 0.022 | 1.70E-06 | 0.019     | 0.028 | 0.49    | -0.010 | 0.058 | 0.86    |
| rs1544861   | 11  | 10679441  | T  | C  | F   | 24.72 | -0.037    | 0.333 | 0.007 | 6.60E-07 | -0.010    | 0.010 | 0.29    | -0.018 | 0.018 | 0.32    |
| rs11171710  | 12  | 56368078  | A  | G  | F   | 23.26 | 0.034     | 0.447 | 0.007 | 1.40E-06 | -0.004    | 0.010 | 0.70    | 0.000  | 0.018 | 0.99    |
| rs1458612   | 12  | 75483802  | T  | C  | F   | 21.41 | -0.035    | 0.303 | 0.008 | 3.70E-06 | 0.005     | 0.010 | 0.62    | -0.038 | 0.019 | 0.05    |
| rs3001426   | 12  | 57509055  | C  | T  | F   | 64.37 | -0.056    | 0.453 | 0.007 | 1.00E-15 | -0.010    | 0.009 | 0.27    | -0.031 | 0.018 | 0.08    |
| rs3809218   | 12  | 9066613   | C  | T  | F   | 21.04 | -0.034    | 0.335 | 0.007 | 4.50E-06 | -0.010    | 0.010 | 0.29    | -0.019 | 0.018 | 0.29    |
| rs17081175  | 13  | 66919700  | A  | C  | F   | 23.48 | -0.038    | 0.265 | 0.008 | 1.30E-06 | -0.011    | 0.011 | 0.31    | 0.001  | 0.021 | 0.96    |
| rs56044130  | 14  | 94821812  | G  | A  | F   | 24.05 | 0.058     | 0.095 | 0.012 | 9.40E-07 | 0.023     | 0.016 | 0.17    | 0.025  | 0.033 | 0.45    |
| rs8013531   | 14  | 23247687  | T  | C  | F   | 23.25 | 0.034     | 0.405 | 0.007 | 1.40E-06 | -0.001    | 0.010 | 0.94    | NA     | NA    | NA      |
| rs34862454  | 15  | 75101530  | C  | T  | F   | 29.97 | -0.040    | 0.330 | 0.007 | 4.40E-08 | 0.003     | 0.010 | 0.73    | 0.022  | 0.019 | 0.24    |
| rs10164103  | 18  | 65419274  | G  | A  | F   | 24.36 | -0.058    | 0.097 | 0.012 | 8.00E-07 | -0.019    | 0.015 | 0.20    | -0.006 | 0.030 | 0.85    |
| rs144713500 | 19  | 5158138   | A  | G  | F   | 21.02 | 0.140     | 0.013 | 0.031 | 4.50E-06 | 0.015     | 0.048 | 0.76    | NA     | NA    | NA      |

<sup>a</sup> Identified as potentially invalid instrument due to reverse causation by Steiger filtering for exposure on outcome MDD.

<sup>b</sup> Identified as potentially invalid instrument due to reverse causation by Steiger filtering for exposure on outcome ASRD.

| Abbreviations:                                           |
|----------------------------------------------------------|
| MDD: Major depressive disorder/ major depression outcome |
| ASRD: Anxiety and stress-related disorders outcome       |
| SNP: Single nucleotide polymorphism - genetic instrument |
| CHR: Chromosome                                          |
| POS: Position                                            |
| beta: SNP effect                                         |
| se: standard error of SNP effect                         |
| P-value: P-value associated with SNP effect              |
| N: GWAS sample size                                      |

**eTable 7. Independent Instruments for Anxiety and Stress Related Disorder: Harmonized Data**

| SNP         | CHR | POS       | EA | OA | PAL | F     | EXPOSURE |       |          | OUTCOMES: |       |       |            |        |       |       |           |
|-------------|-----|-----------|----|----|-----|-------|----------|-------|----------|-----------|-------|-------|------------|--------|-------|-------|-----------|
|             |     |           |    |    |     |       | beta     | se    | P-value  | ASRD      |       |       | OPIOID USE |        |       |       | NSAID USE |
|             |     |           |    |    |     |       |          |       |          | beta      | eaf   | se    | P-value    | beta   | eaf   | se    | P-value   |
| rs11122148  | 1   | 6848505   | A  | C  | F   | 21.83 | -0.113   | 0.024 | 2.85E-06 | -0.015    | 0.156 | 0.015 | 0.16       | 0.010  | 0.156 | 0.010 | 0.15      |
| rs12726220  | 1   | 154171550 | A  | G  | F   | 22.53 | 0.217    | 0.046 | 2.10E-06 | -0.019    | 0.945 | 0.024 | 0.21       | -0.008 | 0.946 | 0.015 | 0.30      |
| rs4655809   | 1   | 66389097  | T  | C  | F   | 31.80 | -0.103   | 0.018 | 1.60E-08 | -0.032    | 0.361 | 0.011 | 0.003      | -0.010 | 0.363 | 0.007 | 0.10      |
| rs6425515   | 1   | 179021232 | A  | G  | F   | 21.64 | 0.084    | 0.018 | 3.38E-06 | -0.002    | 0.663 | 0.011 | 0.42       | 0.004  | 0.664 | 0.007 | 0.28      |
| rs698763    | 2   | 44573624  | A  | G  | F   | 20.92 | 0.090    | 0.020 | 4.65E-06 | -0.009    | 0.753 | 0.012 | 0.23       | -0.016 | 0.753 | 0.008 | 0.03      |
| rs79928194  | 2   | 233649290 | T  | C  | F   | 23.55 | -0.148   | 0.031 | 1.26E-06 | 0.002     | 0.904 | 0.018 | 0.45       | -0.007 | 0.905 | 0.012 | 0.28      |
| rs11131050  | 3   | 6733772   | T  | C  | F   | 20.94 | -0.081   | 0.018 | 4.59E-06 | 0.002     | 0.535 | 0.011 | 0.44       | -0.003 | 0.535 | 0.007 | 0.32      |
| rs153248    | 5   | 83469915  | T  | C  | F   | 22.16 | 0.082    | 0.017 | 2.34E-06 | 0.000     | 0.483 | 0.011 | 0.49       | -0.011 | 0.483 | 0.007 | 0.06      |
| rs2451828   | 5   | 7448796   | T  | C  | F   | 24.55 | 0.293    | 0.059 | 7.37E-07 | -0.027    | 0.021 | 0.037 | 0.23       | 0.016  | 0.022 | 0.024 | 0.25      |
| rs118050449 | 7   | 67517974  | T  | G  | F   | 22.01 | 0.270    | 0.058 | 2.76E-06 | 0.026     | 0.016 | 0.043 | 0.27       | 0.010  | 0.016 | 0.027 | 0.35      |
| rs73035954  | 7   | 3563804   | T  | C  | F   | 21.27 | -0.093   | 0.020 | 4.19E-06 | -0.039    | 0.246 | 0.012 | 9.43E-04   | -0.026 | 0.246 | 0.008 | 5.76E-04  |
| rs16916239  | 8   | 87643741  | A  | G  | F   | 24.05 | -0.102   | 0.021 | 8.96E-07 | -0.013    | 0.796 | 0.013 | 0.16       | -0.004 | 0.797 | 0.009 | 0.33      |
| rs7041651   | 9   | 25183143  | C  | G  | T   | 21.59 | 0.121    | 0.026 | 3.33E-06 | 0.005     | 0.878 | 0.016 | 0.37       | -0.013 | 0.877 | 0.011 | 0.11      |
| rs17141926  | 11  | 81021839  | T  | C  | F   | 22.77 | -0.094   | 0.020 | 1.92E-06 | 0.012     | 0.739 | 0.012 | 0.17       | 0.001  | 0.739 | 0.008 | 0.44      |
| rs2263551   | 15  | 40979543  | A  | G  | F   | 21.31 | 0.079    | 0.017 | 4.01E-06 | 0.001     | 0.506 | 0.011 | 0.47       | 0.000  | 0.505 | 0.007 | 0.48      |
| rs4780239   | 15  | 29852093  | A  | G  | F   | 21.49 | -0.113   | 0.024 | 3.74E-06 | 0.005     | 0.773 | 0.013 | 0.34       | 0.013  | 0.775 | 0.008 | 0.05      |
| rs113545947 | 19  | 32632463  | T  | C  | F   | 20.89 | -0.191   | 0.042 | 4.87E-06 | -0.015    | 0.957 | 0.027 | 0.29       | -0.028 | 0.957 | 0.017 | 0.05      |
| rs6030245   | 20  | 41070559  | T  | C  | F   | 25.36 | 0.113    | 0.023 | 5.06E-07 | 0.014     | 0.781 | 0.013 | 0.15       | -0.006 | 0.781 | 0.008 | 0.23      |
|             |     |           |    |    |     |       |          |       |          |           |       |       |            |        |       |       |           |

|             |     |           |    |    |     |       | EXPOSURE: |       |          | OUTCOMES:                       |       |       |         |             |       |       |         |
|-------------|-----|-----------|----|----|-----|-------|-----------|-------|----------|---------------------------------|-------|-------|---------|-------------|-------|-------|---------|
|             |     |           |    |    |     |       | ASRD      |       |          | SALICYLIC ACID/ DERIVATIVES USE |       |       |         | ANILIDE USE |       |       |         |
| SNP         | CHR | POS       | EA | OA | PAL | F     | beta      | se    | P-value  | beta                            | eaf   | se    | P-value | beta        | eaf   | se    | P-value |
| rs11122148  | 1   | 6848505   | A  | C  | F   | 21.83 | -0.113    | 0.024 | 2.85E-06 | -0.011                          | 0.156 | 0.011 | 0.32    | -0.002      | 0.156 | 0.009 | 0.86    |
| rs12726220  | 1   | 154171550 | A  | G  | F   | 22.53 | 0.217     | 0.046 | 2.10E-06 | -0.004                          | 0.946 | 0.017 | 0.80    | -0.015      | 0.945 | 0.014 | 0.29    |
| rs4655809   | 1   | 66389097  | T  | C  | F   | 31.80 | -0.103    | 0.018 | 1.60E-08 | NA                              | NA    | NA    | NA      | -0.011      | 0.361 | 0.007 | 0.12    |
| rs6425515   | 1   | 179021232 | A  | G  | F   | 21.64 | 0.084     | 0.018 | 3.38E-06 | 0.004                           | 0.663 | 0.008 | 0.62    | 0.017       | 0.664 | 0.007 | 0.02    |
| rs698763    | 2   | 44573624  | A  | G  | F   | 20.92 | 0.090     | 0.020 | 4.65E-06 | NA                              | NA    | NA    | NA      | -0.011      | 0.753 | 0.008 | 0.15    |
| rs79928194  | 2   | 233649290 | T  | C  | F   | 23.55 | -0.148    | 0.031 | 1.26E-06 | -0.017                          | 0.904 | 0.014 | 0.20    | -0.001      | 0.904 | 0.011 | 0.96    |
| rs11131050  | 3   | 6733772   | T  | C  | F   | 20.94 | -0.081    | 0.018 | 4.59E-06 | NA                              | NA    | NA    | NA      | 0.002       | 0.536 | 0.007 | 0.81    |
| rs153248    | 5   | 83469915  | T  | C  | F   | 22.16 | 0.082     | 0.017 | 2.34E-06 | NA                              | NA    | NA    | NA      | -0.012      | 0.482 | 0.007 | 0.07    |
| rs2451828   | 5   | 7448796   | T  | C  | F   | 24.55 | 0.293     | 0.059 | 7.37E-07 | -0.023                          | 0.021 | 0.028 | 0.39    | -0.006      | 0.022 | 0.023 | 0.78    |
| rs118050449 | 7   | 67517974  | T  | G  | F   | 22.01 | 0.270     | 0.058 | 2.76E-06 | 0.030                           | 0.016 | 0.031 | 0.33    | 0.019       | 0.016 | 0.026 | 0.46    |
| rs73035954  | 7   | 3563804   | T  | C  | F   | 21.27 | -0.093    | 0.020 | 4.19E-06 | NA                              | NA    | NA    | NA      | -0.017      | 0.246 | 0.008 | 0.02    |
| rs16916239  | 8   | 87643741  | A  | G  | F   | 24.05 | -0.102    | 0.021 | 8.96E-07 | -0.002                          | 0.797 | 0.010 | 0.86    | 0.000       | 0.798 | 0.008 | 0.99    |
| rs7041651   | 9   | 25183143  | C  | G  | T   | 21.59 | 0.121     | 0.026 | 3.33E-06 | NA                              | NA    | NA    | NA      | 0.002       | 0.878 | 0.010 | 0.82    |
| rs17141926  | 11  | 81021839  | T  | C  | F   | 22.77 | -0.094    | 0.020 | 1.92E-06 | NA                              | NA    | NA    | NA      | 0.003       | 0.738 | 0.007 | 0.70    |
| rs2263551   | 15  | 40979543  | A  | G  | F   | 21.31 | 0.079     | 0.017 | 4.01E-06 | NA                              | NA    | NA    | NA      | 0.010       | 0.506 | 0.007 | 0.13    |
| rs4780239   | 15  | 29852093  | A  | G  | F   | 21.49 | -0.113    | 0.024 | 3.74E-06 | -0.008                          | 0.773 | 0.009 | 0.41    | 0.011       | 0.774 | 0.008 | 0.18    |
| rs113545947 | 19  | 32632463  | T  | C  | F   | 20.89 | -0.191    | 0.042 | 4.87E-06 | -0.009                          | 0.957 | 0.020 | 0.65    | -0.012      | 0.957 | 0.016 | 0.47    |
| rs6030245   | 20  | 41070559  | T  | C  | F   | 25.36 | 0.113     | 0.023 | 5.06E-07 | 0.010                           | 0.780 | 0.010 | 0.31    | -0.001      | 0.780 | 0.008 | 0.95    |

<sup>a</sup> Identified as potentially invalid instrument due to reverse causation by Steiger filtering for exposure on outcome MDD

<sup>b</sup> Identified as potentially invalid instrument due to reverse causation by Steiger filtering for exposure on outcome ASRD

| Abbreviations:                                           |
|----------------------------------------------------------|
| MDD: Major depressive disorder/ major depression outcome |
| ASRD: Anxiety and stress-related disorders outcome       |
| SNP: Single nucleotide polymorphism - genetic instrument |
| CHR: Chromosome                                          |
| POS: Position                                            |
| beta: SNP effect                                         |

|                                             |
|---------------------------------------------|
| se: standard error of SNP effect            |
| P-value: P-value associated with SNP effect |
| N: GWAS sample size                         |
| F: F statistic                              |



**eTable 8. Independent Instruments for Major Depressive Disorder: Harmonized Data**

| SNP                         | CHR | POS       | EA | OA | PAL | F     | EXPOSURE: |       |          | OUTCOMES: |       |       |         |             |       |       |          |
|-----------------------------|-----|-----------|----|----|-----|-------|-----------|-------|----------|-----------|-------|-------|---------|-------------|-------|-------|----------|
|                             |     |           |    |    |     |       | MDD       |       |          | NSAID USE |       |       |         | ANILIDE USE |       |       |          |
|                             |     |           |    |    |     |       | effect    | se    | P-value  | effect    | eaf   | se    | P-value | effect      | eaf   | se    | P-value  |
| rs11205624                  | 1   | 49867034  | T  | C  | F   | 21.03 | -0.027    | 0.006 | 4.89E-06 | 0.004     | 0.772 | 0.008 | 0.30    | -0.013      | 0.771 | 0.008 | 0.09     |
| rs1432639                   | 1   | 72813218  | A  | C  | F   | 60.84 | 0.039     | 0.005 | 4.55E-15 | 0.004     | 0.604 | 0.007 | 0.28    | 0.000       | 0.603 | 0.007 | 0.94     |
| rs159963                    | 1   | 8504421   | A  | C  | F   | 30.37 | -0.027    | 0.005 | 3.19E-08 | -0.012    | 0.584 | 0.007 | 0.05    | -0.006      | 0.585 | 0.007 | 0.33     |
| rs2102341 <sup>a</sup>      | 1   | 37193908  | T  | C  | F   | 28.72 | 0.028     | 0.005 | 6.28E-08 | 0.019     | 0.291 | 0.008 | 0.006   | 0.015       | 0.292 | 0.007 | 0.04     |
| rs2332571                   | 1   | 181625702 | T  | C  | F   | 28.63 | 0.031     | 0.006 | 1.08E-07 | -0.023    | 0.225 | 0.008 | 0.003   | -0.016      | 0.227 | 0.008 | 0.05     |
| rs2389016 <sup>a</sup>      | 1   | 80799329  | T  | C  | F   | 33.12 | 0.031     | 0.005 | 1.02E-08 | 0.020     | 0.295 | 0.008 | 0.004   | 0.022       | 0.295 | 0.007 | 0.002    |
| rs2576241                   | 1   | 217100192 | A  | C  | F   | 22.97 | -0.023    | 0.005 | 1.66E-06 | -0.007    | 0.522 | 0.007 | 0.16    | -0.004      | 0.523 | 0.007 | 0.59     |
| rs451162                    | 1   | 4834202   | C  | G  | T   | 20.55 | 0.027     | 0.006 | 4.89E-06 | -0.005    | 0.790 | 0.008 | 0.30    | -0.002      | 0.791 | 0.008 | 0.76     |
| rs4660091                   | 1   | 241628430 | T  | C  | F   | 25.98 | -0.026    | 0.005 | 2.88E-07 | 0.010     | 0.652 | 0.007 | 0.09    | -0.005      | 0.650 | 0.007 | 0.49     |
| rs7543975                   | 1   | 23381116  | A  | G  | F   | 23.51 | -0.026    | 0.005 | 1.40E-06 | -0.004    | 0.291 | 0.008 | 0.31    | 0.014       | 0.292 | 0.007 | 0.05     |
| rs9427672                   | 1   | 197754741 | A  | G  | F   | 30.63 | -0.032    | 0.006 | 3.12E-08 | -0.008    | 0.236 | 0.008 | 0.16    | -0.014      | 0.237 | 0.008 | 0.07     |
| rs10193609                  | 2   | 58890837  | A  | G  | F   | 21.69 | 0.033     | 0.007 | 3.16E-06 | 0.017     | 0.854 | 0.010 | 0.04    | 0.006       | 0.854 | 0.009 | 0.54     |
| rs11674333 <sup>a</sup>     | 2   | 22517989  | A  | G  | F   | 28.23 | 0.026     | 0.005 | 1.04E-07 | 0.005     | 0.473 | 0.007 | 0.22    | 0.008       | 0.472 | 0.007 | 0.23     |
| rs11682175                  | 2   | 57987593  | T  | C  | F   | 34.27 | -0.028    | 0.005 | 4.68E-09 | 0.004     | 0.526 | 0.007 | 0.29    | -0.008      | 0.527 | 0.007 | 0.22     |
| rs1226412                   | 2   | 157111313 | T  | C  | F   | 31.67 | 0.033     | 0.006 | 2.38E-08 | 0.009     | 0.797 | 0.009 | 0.14    | 0.015       | 0.797 | 0.008 | 0.07     |
| rs13032969                  | 2   | 173828544 | T  | C  | F   | 22.83 | -0.026    | 0.005 | 1.69E-06 | -0.010    | 0.300 | 0.008 | 0.10    | -0.009      | 0.300 | 0.007 | 0.19     |
| rs13414769                  | 2   | 240201797 | T  | C  | F   | 23.65 | 0.025     | 0.005 | 1.10E-06 | -0.003    | 0.668 | 0.007 | 0.36    | -0.004      | 0.668 | 0.007 | 0.60     |
| rs17229439                  | 2   | 144096234 | T  | C  | F   | 26.66 | -0.028    | 0.006 | 2.99E-07 | 0.003     | 0.740 | 0.008 | 0.34    | -0.009      | 0.739 | 0.007 | 0.24     |
| rs62188629 <sup>a,c,d</sup> | 2   | 208044470 | A  | G  | F   | 26.17 | 0.027     | 0.005 | 3.07E-07 | 0.012     | 0.309 | 0.007 | 0.05    | 0.028       | 0.310 | 0.007 | 6.40E-05 |
| rs7580862                   | 2   | 220734528 | T  | C  | F   | 24.28 | 0.028     | 0.006 | 7.80E-07 | 0.014     | 0.234 | 0.008 | 0.04    | 0.006       | 0.233 | 0.008 | 0.42     |
| rs76485002                  | 2   | 127342267 | A  | G  | F   | 36.47 | 0.109     | 0.018 | 1.60E-09 | -0.004    | 0.975 | 0.022 | 0.43    | 0.038       | 0.976 | 0.021 | 0.07     |
| rs113689582 <sup>a</sup>    | 3   | 108150991 | T  | C  | F   | 22.53 | -0.034    | 0.007 | 1.74E-06 | -0.004    | 0.135 | 0.010 | 0.35    | -0.021      | 0.135 | 0.010 | 0.03     |
| rs2316896                   | 3   | 56383610  | T  | C  | F   | 23.36 | 0.038     | 0.008 | 1.41E-06 | -0.002    | 0.888 | 0.011 | 0.44    | -0.004      | 0.889 | 0.011 | 0.73     |

|                         |     |           |    |    |     |       | EXPOSURE: |       |          | OUTCOMES: |       |       |          |             |       |       |          |
|-------------------------|-----|-----------|----|----|-----|-------|-----------|-------|----------|-----------|-------|-------|----------|-------------|-------|-------|----------|
|                         |     |           |    |    |     |       | MDD       |       |          | NSAID USE |       |       |          | ANILIDE USE |       |       |          |
| SNP                     | CHR | POS       | EA | OA | PAL | F     | effect    | se    | P-value  | effect    | eaf   | se    | P-value  | effect      | eaf   | se    | P-value  |
| rs4645169 <sup>b</sup>  | 3   | 158908427 | T  | C  | F   | 23.59 | -0.024    | 0.005 | 1.39E-06 | -0.026    | 0.406 | 0.007 | 1.16E-04 | -0.006      | 0.405 | 0.007 | 0.36     |
| rs73102900              | 3   | 61337306  | A  | G  | F   | 26.77 | -0.056    | 0.011 | 2.07E-07 | 0.014     | 0.051 | 0.016 | 0.19     | -0.004      | 0.050 | 0.015 | 0.81     |
| rs7430565               | 3   | 158107180 | A  | G  | F   | 36.00 | -0.029    | 0.005 | 2.87E-09 | 0.009     | 0.586 | 0.007 | 0.11     | 0.003       | 0.585 | 0.007 | 0.60     |
| rs7649917               | 3   | 193289549 | T  | C  | F   | 28.63 | -0.031    | 0.006 | 8.91E-08 | 0.002     | 0.775 | 0.008 | 0.40     | -0.001      | 0.774 | 0.008 | 0.93     |
| rs9869821               | 3   | 44393136  | A  | G  | F   | 29.28 | 0.028     | 0.005 | 6.34E-08 | 0.009     | 0.320 | 0.007 | 0.10     | 0.003       | 0.318 | 0.007 | 0.68     |
| rs13112458              | 4   | 28085218  | A  | C  | F   | 25.96 | 0.027     | 0.005 | 3.13E-07 | 0.008     | 0.286 | 0.008 | 0.15     | 0.011       | 0.286 | 0.007 | 0.14     |
| rs1484144 <sup>c</sup>  | 4   | 80217597  | T  | C  | F   | 21.77 | 0.022     | 0.005 | 3.44E-06 | 0.014     | 0.460 | 0.007 | 0.02     | 0.019       | 0.459 | 0.007 | 0.004    |
| rs34215985              | 4   | 42047778  | C  | G  | T   | 35.05 | -0.037    | 0.006 | 3.13E-09 | 0.000     | 0.205 | 0.009 | 0.49     | -0.010      | 0.204 | 0.008 | 0.20     |
| rs6848655               | 4   | 14928149  | A  | G  | F   | 20.67 | 0.024     | 0.005 | 4.70E-06 | 0.003     | 0.306 | 0.008 | 0.34     | -0.004      | 0.306 | 0.007 | 0.59     |
| rs75990749              | 4   | 175349867 | C  | G  | T   | 28.57 | 0.074     | 0.014 | 9.84E-08 | 0.003     | 0.046 | 0.016 | 0.42     | 0.006       | 0.046 | 0.016 | 0.68     |
| rs77087420 <sup>a</sup> | 4   | 123122856 | A  | G  | F   | 27.80 | 0.058     | 0.011 | 1.52E-07 | 0.023     | 0.945 | 0.015 | 0.06     | 0.017       | 0.945 | 0.014 | 0.23     |
| rs11135349              | 5   | 164523472 | A  | C  | F   | 37.51 | -0.029    | 0.005 | 1.09E-09 | 0.009     | 0.467 | 0.007 | 0.10     | 0.001       | 0.468 | 0.007 | 0.89     |
| rs3806843               | 5   | 140212538 | T  | C  | F   | 23.19 | -0.024    | 0.005 | 1.37E-06 | -0.002    | 0.466 | 0.007 | 0.37     | 0.003       | 0.467 | 0.007 | 0.65     |
| rs55993664              | 5   | 106603482 | A  | C  | F   | 26.40 | -0.037    | 0.007 | 2.62E-07 | 0.005     | 0.135 | 0.010 | 0.32     | 0.007       | 0.136 | 0.010 | 0.46     |
| rs58141521              | 5   | 77077571  | A  | G  | F   | 22.35 | -0.031    | 0.007 | 2.40E-06 | 0.003     | 0.845 | 0.010 | 0.36     | 0.003       | 0.846 | 0.009 | 0.70     |
| rs71639293 <sup>a</sup> | 5   | 92995013  | A  | G  | F   | 25.34 | 0.031     | 0.006 | 6.16E-07 | -0.005    | 0.798 | 0.009 | 0.27     | 0.003       | 0.798 | 0.008 | 0.75     |
| rs80315381              | 5   | 50484253  | T  | C  | F   | 22.01 | 0.026     | 0.006 | 2.76E-06 | -0.002    | 0.720 | 0.008 | 0.41     | -0.001      | 0.720 | 0.007 | 0.90     |
| rs12194348              | 6   | 130552744 | T  | G  | F   | 23.36 | -0.026    | 0.005 | 1.20E-06 | 0.006     | 0.276 | 0.008 | 0.24     | -0.006      | 0.276 | 0.007 | 0.40     |
| rs13213510 <sup>a</sup> | 6   | 72985011  | T  | C  | F   | 22.02 | -0.037    | 0.008 | 2.35E-06 | 0.011     | 0.099 | 0.012 | 0.17     | 0.010       | 0.099 | 0.011 | 0.38     |
| rs1933802 <sup>a</sup>  | 6   | 105365891 | C  | G  | T   | 28.89 | -0.026    | 0.005 | 9.48E-08 | -0.014    | 0.453 | 0.007 | 0.02     | -0.015      | 0.454 | 0.007 | 0.03     |
| rs4870062 <sup>a</sup>  | 6   | 152237618 | T  | G  | F   | 25.19 | -0.026    | 0.005 | 4.19E-07 | 0.005     | 0.660 | 0.007 | 0.24     | 0.000       | 0.660 | 0.007 | 0.96     |
| rs6905391 <sup>c</sup>  | 6   | 28262686  | A  | G  | F   | 41.21 | -0.044    | 0.007 | 1.35E-10 | -0.033    | 0.164 | 0.009 | 1.89E-04 | -0.042      | 0.162 | 0.009 | 2.50E-06 |
| rs9355502               | 6   | 165136229 | A  | G  | F   | 26.71 | -0.025    | 0.005 | 2.60E-07 | -0.001    | 0.448 | 0.007 | 0.45     | -0.004      | 0.447 | 0.007 | 0.51     |
| rs9402472 <sup>a</sup>  | 6   | 99566521  | A  | G  | F   | 30.72 | 0.033     | 0.006 | 2.78E-08 | 0.009     | 0.241 | 0.008 | 0.14     | 0.008       | 0.241 | 0.008 | 0.30     |
| rs12666117              | 7   | 109105611 | A  | G  | F   | 32.59 | 0.027     | 0.005 | 1.35E-08 | 0.007     | 0.464 | 0.007 | 0.15     | 0.007       | 0.465 | 0.007 | 0.28     |

| SNP                      | CHR | POS       | EA | OA | PAL | F     | EXPOSURE: |       |          | OUTCOMES: |       |       |         |             |       |       |          |
|--------------------------|-----|-----------|----|----|-----|-------|-----------|-------|----------|-----------|-------|-------|---------|-------------|-------|-------|----------|
|                          |     |           |    |    |     |       | MDD       |       |          | NSAID USE |       |       |         | ANILIDE USE |       |       |          |
|                          |     |           |    |    |     |       | effect    | se    | P-value  | effect    | eaf   | se    | P-value | effect      | eaf   | se    | P-value  |
| rs1403175 <sup>a,d</sup> | 7   | 1964357   | A  | T  | T   | 23.44 | -0.031    | 0.006 | 1.14E-06 | -0.013    | 0.163 | 0.009 | 0.09    | -0.011      | 0.164 | 0.009 | 0.22     |
| rs2237517                | 7   | 81827390  | A  | C  | F   | 26.04 | 0.025     | 0.005 | 2.68E-07 | -0.003    | 0.429 | 0.007 | 0.34    | -0.001      | 0.428 | 0.007 | 0.92     |
| rs62450957               | 7   | 53320318  | T  | C  | F   | 21.53 | 0.023     | 0.005 | 3.87E-06 | 0.005     | 0.352 | 0.007 | 0.25    | 0.004       | 0.352 | 0.007 | 0.55     |
| rs75903747               | 7   | 82730477  | A  | G  | F   | 25.77 | -0.040    | 0.008 | 4.38E-07 | 0.015     | 0.884 | 0.011 | 0.09    | 0.000       | 0.884 | 0.010 | 0.98     |
| rs79631004 <sup>a</sup>  | 7   | 24844736  | T  | G  | F   | 24.73 | -0.038    | 0.008 | 6.50E-07 | 0.012     | 0.880 | 0.011 | 0.13    | 0.010       | 0.879 | 0.010 | 0.35     |
| rs4242470                | 8   | 52646298  | T  | G  | F   | 27.79 | -0.029    | 0.006 | 1.35E-07 | -0.004    | 0.713 | 0.008 | 0.28    | 0.003       | 0.713 | 0.007 | 0.64     |
| rs7017108                | 8   | 20772332  | T  | C  | F   | 25.21 | 0.025     | 0.005 | 4.16E-07 | 0.016     | 0.420 | 0.007 | 0.01    | 0.020       | 0.420 | 0.007 | 0.002    |
| rs11140773               | 9   | 87444058  | T  | C  | F   | 26.05 | -0.030    | 0.006 | 3.08E-07 | 0.001     | 0.237 | 0.008 | 0.46    | 0.002       | 0.237 | 0.008 | 0.83     |
| rs1354115                | 9   | 2983774   | A  | C  | F   | 31.72 | 0.028     | 0.005 | 2.37E-08 | -0.013    | 0.630 | 0.007 | 0.04    | 0.003       | 0.630 | 0.007 | 0.62     |
| rs4526442 <sup>a</sup>   | 9   | 37207269  | T  | C  | F   | 29.06 | -0.034    | 0.006 | 7.77E-08 | -0.007    | 0.838 | 0.009 | 0.22    | -0.017      | 0.839 | 0.009 | 0.05     |
| rs7856424                | 9   | 119733595 | T  | C  | F   | 33.34 | -0.031    | 0.005 | 8.48E-09 | -0.018    | 0.284 | 0.008 | 0.01    | -0.019      | 0.284 | 0.007 | 0.009    |
| rs61867293               | 10  | 106563924 | T  | C  | F   | 37.59 | -0.037    | 0.006 | 6.97E-10 | 0.002     | 0.192 | 0.009 | 0.41    | -0.014      | 0.190 | 0.008 | 0.10     |
| rs9663959                | 10  | 70181632  | T  | C  | F   | 23.07 | 0.032     | 0.007 | 1.78E-06 | 0.005     | 0.828 | 0.009 | 0.28    | 0.006       | 0.828 | 0.009 | 0.47     |
| rs10895718               | 11  | 104551887 | A  | G  | F   | 25.39 | -0.026    | 0.005 | 4.02E-07 | -0.009    | 0.652 | 0.007 | 0.11    | -0.002      | 0.652 | 0.007 | 0.77     |
| rs141769277              | 11  | 89343606  | T  | G  | F   | 27.06 | -0.070    | 0.013 | 2.08E-07 | -0.016    | 0.959 | 0.017 | 0.18    | -0.008      | 0.959 | 0.016 | 0.65     |
| rs1526565                | 11  | 131639170 | T  | C  | F   | 20.89 | 0.022     | 0.005 | 4.67E-06 | -0.001    | 0.479 | 0.007 | 0.47    | 0.004       | 0.480 | 0.007 | 0.56     |
| rs174594                 | 11  | 61619829  | A  | C  | F   | 25.21 | -0.026    | 0.005 | 4.26E-07 | 0.004     | 0.628 | 0.007 | 0.31    | 0.011       | 0.627 | 0.007 | 0.12     |
| rs1806153                | 11  | 31850105  | T  | G  | F   | 37.44 | 0.036     | 0.006 | 1.18E-09 | 0.013     | 0.230 | 0.008 | 0.05    | 0.015       | 0.231 | 0.008 | 0.05     |
| rs2412137 <sup>a</sup>   | 11  | 3090205   | A  | G  | F   | 23.23 | 0.024     | 0.005 | 1.81E-06 | 0.011     | 0.382 | 0.007 | 0.07    | 0.012       | 0.382 | 0.007 | 0.08     |
| rs2509805 <sup>a,c</sup> | 11  | 57650796  | T  | C  | F   | 27.77 | 0.027     | 0.005 | 1.47E-07 | 0.018     | 0.318 | 0.007 | 0.008   | 0.025       | 0.318 | 0.007 | 4.00E-04 |
| rs2514218 <sup>a</sup>   | 11  | 113392994 | T  | C  | F   | 25.81 | -0.025    | 0.005 | 4.90E-07 | 0.003     | 0.356 | 0.007 | 0.33    | -0.006      | 0.355 | 0.007 | 0.37     |
| rs326783                 | 11  | 29633243  | A  | T  | T   | 26.01 | -0.026    | 0.005 | 3.27E-07 | -0.014    | 0.642 | 0.007 | 0.03    | -0.013      | 0.641 | 0.007 | 0.05     |
| rs7118275 <sup>a</sup>   | 11  | 16271678  | T  | C  | F   | 24.02 | 0.029     | 0.006 | 1.09E-06 | 0.007     | 0.794 | 0.009 | 0.22    | 0.017       | 0.795 | 0.008 | 0.04     |
| rs7130926                | 11  | 113496928 | T  | C  | F   | 22.13 | -0.033    | 0.007 | 2.22E-06 | -0.003    | 0.858 | 0.010 | 0.37    | -0.019      | 0.858 | 0.009 | 0.04     |
| rs2956287 <sup>a</sup>   | 12  | 84709216  | A  | G  | F   | 21.50 | -0.026    | 0.006 | 3.70E-06 | -0.008    | 0.748 | 0.008 | 0.16    | -0.011      | 0.748 | 0.008 | 0.16     |

| SNP                        | CHR | POS       | EA | OA | PAL | F     | EXPOSURE: |       |          | OUTCOMES: |       |       |          |             |       |       |          |
|----------------------------|-----|-----------|----|----|-----|-------|-----------|-------|----------|-----------|-------|-------|----------|-------------|-------|-------|----------|
|                            |     |           |    |    |     |       | MDD       |       |          | NSAID USE |       |       |          | ANILIDE USE |       |       |          |
|                            |     |           |    |    |     |       | effect    | se    | P-value  | effect    | eaf   | se    | P-value  | effect      | eaf   | se    | P-value  |
| rs4074723 <sup>a</sup>     | 12  | 23947737  | A  | C  | F   | 30.37 | -0.027    | 0.005 | 3.12E-08 | -0.010    | 0.411 | 0.007 | 0.09     | -0.002      | 0.411 | 0.007 | 0.77     |
| rs58235352                 | 12  | 121186246 | A  | G  | F   | 27.92 | -0.058    | 0.011 | 1.29E-07 | -0.009    | 0.053 | 0.015 | 0.28     | 0.008       | 0.054 | 0.015 | 0.59     |
| rs12552                    | 13  | 53625781  | A  | G  | F   | 79.87 | 0.043     | 0.005 | 6.07E-19 | 0.014     | 0.436 | 0.007 | 0.03     | 0.005       | 0.436 | 0.007 | 0.46     |
| rs548886                   | 13  | 75792799  | A  | C  | F   | 25.79 | 0.026     | 0.005 | 3.19E-07 | 0.011     | 0.343 | 0.007 | 0.07     | 0.010       | 0.343 | 0.007 | 0.13     |
| rs574593                   | 13  | 27118279  | T  | C  | F   | 26.66 | -0.028    | 0.006 | 2.11E-07 | 0.006     | 0.271 | 0.008 | 0.22     | -0.009      | 0.271 | 0.007 | 0.22     |
| rs9592461 <sup>a,b,c</sup> | 13  | 66941792  | A  | G  | F   | 27.14 | 0.025     | 0.005 | 1.77E-07 | 0.031     | 0.480 | 0.007 | 2.80E-06 | 0.030       | 0.480 | 0.007 | 5.40E-06 |
| rs10149470                 | 14  | 104017953 | A  | G  | F   | 35.02 | -0.029    | 0.005 | 3.05E-09 | -0.005    | 0.486 | 0.007 | 0.25     | -0.008      | 0.486 | 0.007 | 0.20     |
| rs12882789                 | 14  | 32467041  | A  | G  | F   | 21.95 | 0.025     | 0.005 | 2.89E-06 | -0.001    | 0.728 | 0.008 | 0.43     | 0.003       | 0.728 | 0.007 | 0.67     |
| rs2005864                  | 14  | 75377692  | T  | C  | F   | 33.12 | 0.028     | 0.005 | 6.73E-09 | 0.003     | 0.438 | 0.007 | 0.36     | 0.013       | 0.438 | 0.007 | 0.04     |
| rs4904738 <sup>a,c,d</sup> | 14  | 42179732  | T  | C  | F   | 34.79 | -0.029    | 0.005 | 2.57E-09 | -0.018    | 0.572 | 0.007 | 0.005    | -0.025      | 0.572 | 0.007 | 1.60E-04 |
| rs915057                   | 14  | 64686207  | A  | G  | F   | 37.47 | -0.030    | 0.005 | 7.61E-10 | -0.004    | 0.433 | 0.007 | 0.27     | -0.009      | 0.433 | 0.007 | 0.20     |
| rs12440728                 | 15  | 36405461  | A  | T  | T   | 25.62 | 0.025     | 0.005 | 3.93E-07 | -0.007    | 0.404 | 0.007 | 0.17     | -0.002      | 0.404 | 0.007 | 0.74     |
| rs281279 <sup>a</sup>      | 15  | 47660902  | T  | C  | F   | 24.85 | 0.033     | 0.007 | 5.78E-07 | -0.002    | 0.150 | 0.010 | 0.41     | 0.012       | 0.149 | 0.009 | 0.19     |
| rs4542627 <sup>a</sup>     | 15  | 78070743  | A  | T  | T   | 23.59 | -0.024    | 0.005 | 1.20E-06 | -0.006    | 0.416 | 0.007 | 0.18     | -0.019      | 0.415 | 0.007 | 0.005    |
| rs8025231                  | 15  | 37648402  | A  | C  | F   | 49.87 | -0.034    | 0.005 | 2.36E-12 | -0.006    | 0.552 | 0.007 | 0.21     | -0.012      | 0.553 | 0.007 | 0.07     |
| rs11643192                 | 16  | 72214276  | A  | C  | F   | 30.37 | 0.027     | 0.005 | 3.36E-08 | 0.009     | 0.390 | 0.007 | 0.11     | 0.003       | 0.388 | 0.007 | 0.69     |
| rs11649444 <sup>a</sup>    | 16  | 83435153  | C  | G  | T   | 21.72 | -0.025    | 0.005 | 3.44E-06 | -0.010    | 0.713 | 0.008 | 0.09     | -0.020      | 0.712 | 0.007 | 0.007    |
| rs1542919                  | 16  | 19844790  | C  | G  | T   | 23.55 | -0.030    | 0.006 | 1.14E-06 | 0.000     | 0.786 | 0.008 | 0.48     | -0.012      | 0.786 | 0.008 | 0.14     |
| rs67253370                 | 16  | 52294303  | A  | T  | T   | 22.33 | -0.029    | 0.006 | 2.61E-06 | -0.002    | 0.182 | 0.009 | 0.43     | -0.013      | 0.182 | 0.009 | 0.14     |
| rs7198928                  | 16  | 7666402   | T  | C  | F   | 32.27 | 0.028     | 0.005 | 1.00E-08 | -0.010    | 0.617 | 0.007 | 0.08     | -0.011      | 0.616 | 0.007 | 0.09     |
| rs8063603                  | 16  | 6310645   | A  | G  | F   | 33.77 | -0.031    | 0.005 | 6.87E-09 | -0.006    | 0.681 | 0.008 | 0.20     | -0.002      | 0.683 | 0.007 | 0.78     |
| rs17727765                 | 17  | 27576962  | T  | C  | F   | 33.32 | -0.051    | 0.009 | 8.51E-09 | 0.001     | 0.924 | 0.013 | 0.48     | 0.006       | 0.925 | 0.013 | 0.62     |
| rs11663393 <sup>a</sup>    | 18  | 50614732  | A  | G  | F   | 32.19 | 0.028     | 0.005 | 1.65E-08 | 0.004     | 0.461 | 0.007 | 0.26     | 0.012       | 0.461 | 0.007 | 0.06     |
| rs12958048                 | 18  | 53101598  | A  | G  | F   | 43.93 | 0.034     | 0.005 | 3.61E-11 | 0.007     | 0.335 | 0.007 | 0.16     | 0.008       | 0.335 | 0.007 | 0.27     |
| rs62099069                 | 18  | 36883737  | A  | T  | T   | 32.41 | -0.028    | 0.005 | 1.31E-08 | 0.002     | 0.421 | 0.007 | 0.37     | 0.004       | 0.421 | 0.007 | 0.51     |

|                          |     |          |    |    |     |       | EXPOSURE: |       |          | OUTCOMES: |       |       |         |             |       |       |          |
|--------------------------|-----|----------|----|----|-----|-------|-----------|-------|----------|-----------|-------|-------|---------|-------------|-------|-------|----------|
|                          |     |          |    |    |     |       | MDD       |       |          | NSAID USE |       |       |         | ANILIDE USE |       |       |          |
| SNP                      | CHR | POS      | EA | OA | PAL | F     | effect    | se    | P-value  | effect    | eaf   | se    | P-value | effect      | eaf   | se    | P-value  |
| rs75344947               | 18  | 40940932 | T  | C  | F   | 24.01 | -0.034    | 0.007 | 1.01E-06 | -0.010    | 0.863 | 0.010 | 0.17    | -0.007      | 0.863 | 0.010 | 0.45     |
| rs28567442               | 19  | 30930222 | T  | C  | F   | 26.63 | 0.026     | 0.005 | 2.57E-07 | -0.004    | 0.590 | 0.007 | 0.29    | 0.013       | 0.591 | 0.007 | 0.05     |
| rs7248751                | 19  | 32447377 | A  | G  | F   | 21.05 | -0.023    | 0.005 | 3.99E-06 | -0.006    | 0.322 | 0.007 | 0.21    | -0.009      | 0.322 | 0.007 | 0.20     |
| rs11697370 <sup>b</sup>  | 20  | 47731767 | T  | C  | F   | 21.71 | -0.023    | 0.005 | 3.53E-06 | 0.022     | 0.378 | 0.007 | 0.001   | 0.009       | 0.379 | 0.007 | 0.20     |
| rs41278104               | 20  | 39990700 | T  | C  | F   | 29.55 | -0.034    | 0.006 | 7.13E-08 | -0.015    | 0.818 | 0.009 | 0.05    | -0.014      | 0.818 | 0.008 | 0.11     |
| rs6063085 <sup>a,c</sup> | 20  | 45840459 | A  | C  | F   | 24.60 | 0.025     | 0.005 | 7.84E-07 | 0.009     | 0.625 | 0.007 | 0.09    | 0.029       | 0.627 | 0.007 | 2.10E-05 |
| rs372519 <sup>a,d</sup>  | 21  | 46574554 | A  | G  | F   | 22.37 | 0.023     | 0.005 | 2.94E-06 | 0.011     | 0.538 | 0.007 | 0.06    | 0.013       | 0.537 | 0.007 | 0.05     |
| rs2267983                | 22  | 50698157 | A  | C  | F   | 28.32 | -0.028    | 0.005 | 1.00E-07 | -0.006    | 0.326 | 0.007 | 0.20    | -0.014      | 0.326 | 0.007 | 0.05     |
| rs415551                 | 22  | 34152661 | T  | G  | F   | 21.69 | 0.033     | 0.007 | 2.78E-06 | -0.012    | 0.137 | 0.010 | 0.12    | -0.015      | 0.138 | 0.009 | 0.12     |
| rs5758265                | 22  | 41617897 | A  | G  | F   | 32.97 | 0.031     | 0.005 | 7.55E-09 | -0.003    | 0.286 | 0.008 | 0.36    | 0.018       | 0.285 | 0.007 | 0.01     |
|                          |     |          |    |    |     |       |           |       |          |           |       |       |         |             |       |       |          |

|                        |     |           |    |    |     |       | EXPOSURE: |       |          | OUTCOMES:                       |       |       |         |            |       |       |         |
|------------------------|-----|-----------|----|----|-----|-------|-----------|-------|----------|---------------------------------|-------|-------|---------|------------|-------|-------|---------|
|                        |     |           |    |    |     |       | MDD       |       |          | SALICYLIC ACID/ DERIVATIVES USE |       |       |         | OPIOID USE |       |       |         |
| SNP                    | CHR | POS       | EA | OA | PAL | F     | effect    | se    | P-value  | effect                          | eaf   | se    | P-value | effect     | eaf   | se    | P-value |
| rs11205624             | 1   | 49867034  | T  | C  | F   | 21.03 | -0.027    | 0.006 | 4.89E-06 | -0.009                          | 0.770 | 0.009 | 0.31    | -0.019     | 0.770 | 0.013 | 0.07    |
| rs1432639              | 1   | 72813218  | A  | C  | F   | 60.84 | 0.039     | 0.005 | 4.55E-15 | 0.003                           | 0.603 | 0.008 | 0.70    | 0.006      | 0.603 | 0.011 | 0.30    |
| rs159963               | 1   | 8504421   | A  | C  | F   | 30.37 | -0.027    | 0.005 | 3.19E-08 | -0.006                          | 0.586 | 0.008 | 0.44    | -0.007     | 0.585 | 0.011 | 0.26    |
| rs2102341 <sup>a</sup> | 1   | 37193908  | T  | C  | F   | 28.72 | 0.028     | 0.005 | 6.28E-08 | 0.008                           | 0.290 | 0.009 | 0.34    | 0.027      | 0.291 | 0.012 | 0.011   |
| rs2332571              | 1   | 181625702 | T  | C  | F   | 28.63 | 0.031     | 0.006 | 1.08E-07 | 0.005                           | 0.227 | 0.010 | 0.59    | -0.008     | 0.227 | 0.013 | 0.28    |
| rs2389016 <sup>a</sup> | 1   | 80799329  | T  | C  | F   | 33.12 | 0.031     | 0.005 | 1.02E-08 | 0.016                           | 0.294 | 0.009 | 0.06    | 0.036      | 0.293 | 0.012 | 0.001   |
| rs2576241              | 1   | 217100192 | A  | C  | F   | 22.97 | -0.023    | 0.005 | 1.66E-06 | -0.011                          | 0.522 | 0.008 | 0.18    | -0.006     | 0.522 | 0.011 | 0.28    |
| rs451162               | 1   | 4834202   | C  | G  | T   | 20.55 | 0.027     | 0.006 | 4.89E-06 | -0.010                          | 0.790 | 0.010 | 0.32    | 0.013      | 0.792 | 0.013 | 0.15    |
| rs4660091              | 1   | 241628430 | T  | C  | F   | 25.98 | -0.026    | 0.005 | 2.88E-07 | 0.010                           | 0.652 | 0.008 | 0.24    | 0.004      | 0.650 | 0.011 | 0.35    |

| SNP                         | CHR | POS       | EA | OA | PAL | F     | EXPOSURE: |       |          | OUTCOMES:                       |       |       |         |            |       |       |          |
|-----------------------------|-----|-----------|----|----|-----|-------|-----------|-------|----------|---------------------------------|-------|-------|---------|------------|-------|-------|----------|
|                             |     |           |    |    |     |       | MDD       |       |          | SALICYLIC ACID/ DERIVATIVES USE |       |       |         | OPIOID USE |       |       |          |
|                             |     |           |    |    |     |       | effect    | se    | P-value  | effect                          | eaf   | se    | P-value | effect     | eaf   | se    | P-value  |
| rs7543975                   | 1   | 23381116  | A  | G  | F   | 23.51 | -0.026    | 0.005 | 1.40E-06 | 0.005                           | 0.291 | 0.009 | 0.55    | 0.012      | 0.290 | 0.012 | 0.16     |
| rs9427672                   | 1   | 197754741 | A  | G  | F   | 30.63 | -0.032    | 0.006 | 3.12E-08 | 0.005                           | 0.239 | 0.009 | 0.56    | 0.002      | 0.238 | 0.013 | 0.44     |
| rs10193609                  | 2   | 58890837  | A  | G  | F   | 21.69 | 0.033     | 0.007 | 3.16E-06 | 0.013                           | 0.851 | 0.011 | 0.25    | 0.010      | 0.853 | 0.015 | 0.25     |
| rs11674333 <sup>a</sup>     | 2   | 22517989  | A  | G  | F   | 28.23 | 0.026     | 0.005 | 1.04E-07 | 0.009                           | 0.473 | 0.008 | 0.26    | 0.027      | 0.474 | 0.011 | 0.007    |
| rs11682175                  | 2   | 57987593  | T  | C  | F   | 34.27 | -0.028    | 0.005 | 4.68E-09 | 0.007                           | 0.529 | 0.008 | 0.40    | 0.006      | 0.528 | 0.011 | 0.28     |
| rs1226412                   | 2   | 157111313 | T  | C  | F   | 31.67 | 0.033     | 0.006 | 2.38E-08 | 0.005                           | 0.796 | 0.010 | 0.64    | 0.008      | 0.795 | 0.013 | 0.28     |
| rs13032969                  | 2   | 173828544 | T  | C  | F   | 22.83 | -0.026    | 0.005 | 1.69E-06 | -0.020                          | 0.298 | 0.009 | 0.02    | 0.006      | 0.300 | 0.012 | 0.30     |
| rs13414769                  | 2   | 240201797 | T  | C  | F   | 23.65 | 0.025     | 0.005 | 1.10E-06 | 0.000                           | 0.668 | 0.008 | 0.98    | 0.001      | 0.668 | 0.011 | 0.48     |
| rs17229439                  | 2   | 144096234 | T  | C  | F   | 26.66 | -0.028    | 0.006 | 2.99E-07 | -0.007                          | 0.738 | 0.009 | 0.41    | 0.001      | 0.739 | 0.012 | 0.48     |
| rs62188629 <sup>a,c,d</sup> | 2   | 208044470 | A  | G  | F   | 26.17 | 0.027     | 0.005 | 3.07E-07 | 0.024                           | 0.311 | 0.009 | 0.005   | 0.041      | 0.310 | 0.012 | 2.30E-04 |
| rs7580862                   | 2   | 220734528 | T  | C  | F   | 24.28 | 0.028     | 0.006 | 7.80E-07 | -0.004                          | 0.232 | 0.009 | 0.70    | 0.015      | 0.234 | 0.013 | 0.12     |
| rs76485002                  | 2   | 127342267 | A  | G  | F   | 36.47 | 0.109     | 0.018 | 1.60E-09 | 0.003                           | 0.976 | 0.026 | 0.91    | 0.036      | 0.976 | 0.035 | 0.16     |
| rs113689582 <sup>a</sup>    | 3   | 108150991 | T  | C  | F   | 22.53 | -0.034    | 0.007 | 1.74E-06 | -0.024                          | 0.135 | 0.012 | 0.04    | -0.026     | 0.135 | 0.016 | 0.04     |
| rs2316896                   | 3   | 56383610  | T  | C  | F   | 23.36 | 0.038     | 0.008 | 1.41E-06 | 0.005                           | 0.888 | 0.013 | 0.69    | 0.016      | 0.889 | 0.017 | 0.17     |
| rs4645169 <sup>b</sup>      | 3   | 158908427 | T  | C  | F   | 23.59 | -0.024    | 0.005 | 1.39E-06 | -0.002                          | 0.407 | 0.008 | 0.76    | 0.010      | 0.407 | 0.011 | 0.18     |
| rs73102900                  | 3   | 61337306  | A  | G  | F   | 26.77 | -0.056    | 0.011 | 2.07E-07 | -0.012                          | 0.050 | 0.018 | 0.51    | -0.026     | 0.050 | 0.025 | 0.14     |
| rs7430565                   | 3   | 158107180 | A  | G  | F   | 36.00 | -0.029    | 0.005 | 2.87E-09 | -0.003                          | 0.587 | 0.008 | 0.71    | 0.003      | 0.585 | 0.011 | 0.40     |
| rs7649917                   | 3   | 193289549 | T  | C  | F   | 28.63 | -0.031    | 0.006 | 8.91E-08 | 0.000                           | 0.774 | 0.009 | 0.96    | -0.013     | 0.774 | 0.013 | 0.16     |
| rs9869821                   | 3   | 44393136  | A  | G  | F   | 29.28 | 0.028     | 0.005 | 6.34E-08 | -0.007                          | 0.318 | 0.008 | 0.41    | -0.001     | 0.318 | 0.011 | 0.46     |
| rs13112458                  | 4   | 28085218  | A  | C  | F   | 25.96 | 0.027     | 0.005 | 3.13E-07 | 0.003                           | 0.284 | 0.009 | 0.76    | 0.006      | 0.285 | 0.012 | 0.31     |
| rs1484144 <sup>c</sup>      | 4   | 80217597  | T  | C  | F   | 21.77 | 0.022     | 0.005 | 3.44E-06 | 0.000                           | 0.458 | 0.008 | 0.96    | 0.004      | 0.459 | 0.011 | 0.37     |
| rs34215985                  | 4   | 42047778  | C  | G  | T   | 35.05 | -0.037    | 0.006 | 3.13E-09 | 0.003                           | 0.206 | 0.010 | 0.74    | -0.001     | 0.206 | 0.013 | 0.48     |
| rs6848655                   | 4   | 14928149  | A  | G  | F   | 20.67 | 0.024     | 0.005 | 4.70E-06 | 0.010                           | 0.306 | 0.009 | 0.24    | 0.011      | 0.307 | 0.012 | 0.18     |
| rs75990749                  | 4   | 175349867 | C  | G  | T   | 28.57 | 0.074     | 0.014 | 9.84E-08 | -0.018                          | 0.046 | 0.019 | 0.33    | 0.010      | 0.046 | 0.026 | 0.35     |
| rs77087420 <sup>a</sup>     | 4   | 123122856 | A  | G  | F   | 27.80 | 0.058     | 0.011 | 1.52E-07 | 0.007                           | 0.945 | 0.017 | 0.68    | 0.066      | 0.945 | 0.024 | 0.003    |

| SNP                      | CHR | POS       | EA | OA | PAL | F     | EXPOSURE: |       |          | OUTCOMES:                       |       |       |          |            |       |       |          |
|--------------------------|-----|-----------|----|----|-----|-------|-----------|-------|----------|---------------------------------|-------|-------|----------|------------|-------|-------|----------|
|                          |     |           |    |    |     |       | MDD       |       |          | SALICYLIC ACID/ DERIVATIVES USE |       |       |          | OPIOID USE |       |       |          |
|                          |     |           |    |    |     |       | effect    | se    | P-value  | effect                          | eaf   | se    | P-value  | effect     | eaf   | se    | P-value  |
| rs11135349               | 5   | 164523472 | A  | C  | F   | 37.51 | -0.029    | 0.005 | 1.09E-09 | 0.004                           | 0.467 | 0.008 | 0.59     | 0.011      | 0.466 | 0.011 | 0.16     |
| rs3806843                | 5   | 140212538 | T  | C  | F   | 23.19 | -0.024    | 0.005 | 1.37E-06 | 0.014                           | 0.468 | 0.008 | 0.09     | -0.004     | 0.466 | 0.011 | 0.35     |
| rs55993664               | 5   | 106603482 | A  | C  | F   | 26.40 | -0.037    | 0.007 | 2.62E-07 | 0.012                           | 0.135 | 0.012 | 0.29     | -0.015     | 0.136 | 0.016 | 0.17     |
| rs58141521               | 5   | 77077571  | A  | G  | F   | 22.35 | -0.031    | 0.007 | 2.40E-06 | 0.001                           | 0.845 | 0.011 | 0.91     | 0.008      | 0.847 | 0.015 | 0.29     |
| rs71639293 <sup>a</sup>  | 5   | 92995013  | A  | G  | F   | 25.34 | 0.031     | 0.006 | 6.16E-07 | -0.004                          | 0.798 | 0.010 | 0.66     | 0.035      | 0.799 | 0.013 | 0.004    |
| rs80315381               | 5   | 50484253  | T  | C  | F   | 22.01 | 0.026     | 0.006 | 2.76E-06 | -0.001                          | 0.721 | 0.009 | 0.95     | 0.006      | 0.721 | 0.012 | 0.31     |
| rs12194348               | 6   | 130552744 | T  | G  | F   | 23.36 | -0.026    | 0.005 | 1.20E-06 | 0.016                           | 0.275 | 0.009 | 0.07     | -0.005     | 0.275 | 0.012 | 0.35     |
| rs13213510 <sup>a</sup>  | 6   | 72985011  | T  | C  | F   | 22.02 | -0.037    | 0.008 | 2.35E-06 | 0.006                           | 0.100 | 0.013 | 0.63     | 0.031      | 0.100 | 0.018 | 0.05     |
| rs1933802 <sup>a</sup>   | 6   | 105365891 | C  | G  | T   | 28.89 | -0.026    | 0.005 | 9.48E-08 | -0.015                          | 0.454 | 0.008 | 0.06     | -0.024     | 0.454 | 0.011 | 0.014    |
| rs4870062 <sup>a</sup>   | 6   | 152237618 | T  | G  | F   | 25.19 | -0.026    | 0.005 | 4.19E-07 | -0.013                          | 0.660 | 0.008 | 0.12     | -0.032     | 0.658 | 0.011 | 0.002    |
| rs6905391 <sup>c</sup>   | 6   | 28262686  | A  | G  | F   | 41.21 | -0.044    | 0.007 | 1.35E-10 | -0.019                          | 0.165 | 0.011 | 0.07     | -0.028     | 0.165 | 0.014 | 0.03     |
| rs9355502                | 6   | 165136229 | A  | G  | F   | 26.71 | -0.025    | 0.005 | 2.60E-07 | -0.010                          | 0.448 | 0.008 | 0.20     | -0.003     | 0.448 | 0.011 | 0.39     |
| rs9402472 <sup>a</sup>   | 6   | 99566521  | A  | G  | F   | 30.72 | 0.033     | 0.006 | 2.78E-08 | 0.007                           | 0.242 | 0.009 | 0.45     | 0.031      | 0.242 | 0.013 | 0.007    |
| rs12666117               | 7   | 109105611 | A  | G  | F   | 32.59 | 0.027     | 0.005 | 1.35E-08 | 0.013                           | 0.464 | 0.008 | 0.10     | 0.009      | 0.464 | 0.011 | 0.21     |
| rs1403175 <sup>a,d</sup> | 7   | 1964357   | A  | T  | T   | 23.44 | -0.031    | 0.006 | 1.14E-06 | -0.037                          | 0.163 | 0.011 | 5.10E-04 | -0.053     | 0.163 | 0.015 | 1.32E-04 |
| rs2237517                | 7   | 81827390  | A  | C  | F   | 26.04 | 0.025     | 0.005 | 2.68E-07 | -0.006                          | 0.427 | 0.008 | 0.47     | 0.005      | 0.428 | 0.011 | 0.32     |
| rs62450957               | 7   | 53320318  | T  | C  | F   | 21.53 | 0.023     | 0.005 | 3.87E-06 | 0.001                           | 0.352 | 0.008 | 0.91     | 0.008      | 0.352 | 0.011 | 0.23     |
| rs75903747               | 7   | 82730477  | A  | G  | F   | 25.77 | -0.040    | 0.008 | 4.38E-07 | 0.014                           | 0.884 | 0.012 | 0.27     | 0.013      | 0.884 | 0.017 | 0.21     |
| rs79631004 <sup>a</sup>  | 7   | 24844736  | T  | G  | F   | 24.73 | -0.038    | 0.008 | 6.50E-07 | 0.011                           | 0.881 | 0.012 | 0.37     | 0.032      | 0.879 | 0.017 | 0.03     |
| rs4242470                | 8   | 52646298  | T  | G  | F   | 27.79 | -0.029    | 0.006 | 1.35E-07 | 0.004                           | 0.713 | 0.009 | 0.68     | 0.007      | 0.714 | 0.012 | 0.28     |
| rs7017108                | 8   | 20772332  | T  | C  | F   | 25.21 | 0.025     | 0.005 | 4.16E-07 | 0.013                           | 0.418 | 0.008 | 0.12     | 0.012      | 0.419 | 0.011 | 0.14     |
| rs11140773               | 9   | 87444058  | T  | C  | F   | 26.05 | -0.030    | 0.006 | 3.08E-07 | -0.002                          | 0.237 | 0.009 | 0.83     | -0.003     | 0.237 | 0.013 | 0.41     |
| rs1354115                | 9   | 2983774   | A  | C  | F   | 31.72 | 0.028     | 0.005 | 2.37E-08 | -0.005                          | 0.630 | 0.008 | 0.57     | 0.010      | 0.632 | 0.011 | 0.17     |
| rs4526442 <sup>a</sup>   | 9   | 37207269  | T  | C  | F   | 29.06 | -0.034    | 0.006 | 7.77E-08 | -0.012                          | 0.839 | 0.011 | 0.26     | -0.044     | 0.839 | 0.015 | 0.001    |
| rs7856424                | 9   | 119733595 | T  | C  | F   | 33.34 | -0.031    | 0.005 | 8.48E-09 | -0.005                          | 0.285 | 0.009 | 0.56     | -0.018     | 0.284 | 0.012 | 0.06     |

|                            |     |           |    |    |     |       | EXPOSURE: |       |          | OUTCOMES:                       |       |       |         |            |       |       |          |
|----------------------------|-----|-----------|----|----|-----|-------|-----------|-------|----------|---------------------------------|-------|-------|---------|------------|-------|-------|----------|
|                            |     |           |    |    |     |       | MDD       |       |          | SALICYLIC ACID/ DERIVATIVES USE |       |       |         | OPIOID USE |       |       |          |
| SNP                        | CHR | POS       | EA | OA | PAL | F     | effect    | se    | P-value  | effect                          | eaf   | se    | P-value | effect     | eaf   | se    | P-value  |
| rs61867293                 | 10  | 106563924 | T  | C  | F   | 37.59 | -0.037    | 0.006 | 6.97E-10 | -0.013                          | 0.190 | 0.010 | 0.21    | -0.008     | 0.190 | 0.014 | 0.27     |
| rs9663959                  | 10  | 70181632  | T  | C  | F   | 23.07 | 0.032     | 0.007 | 1.78E-06 | -0.006                          | 0.828 | 0.011 | 0.54    | 0.006      | 0.829 | 0.014 | 0.35     |
| rs10895718                 | 11  | 104551887 | A  | G  | F   | 25.39 | -0.026    | 0.005 | 4.02E-07 | 0.000                           | 0.651 | 0.008 | 0.99    | -0.005     | 0.650 | 0.011 | 0.34     |
| rs141769277                | 11  | 89343606  | T  | G  | F   | 27.06 | -0.070    | 0.013 | 2.08E-07 | -0.028                          | 0.959 | 0.020 | 0.17    | -0.023     | 0.959 | 0.027 | 0.20     |
| rs1526565                  | 11  | 131639170 | T  | C  | F   | 20.89 | 0.022     | 0.005 | 4.67E-06 | -0.004                          | 0.479 | 0.008 | 0.66    | -0.001     | 0.480 | 0.011 | 0.45     |
| rs174594                   | 11  | 61619829  | A  | C  | F   | 25.21 | -0.026    | 0.005 | 4.26E-07 | 0.019                           | 0.626 | 0.008 | 0.018   | 0.019      | 0.624 | 0.011 | 0.05     |
| rs1806153                  | 11  | 31850105  | T  | G  | F   | 37.44 | 0.036     | 0.006 | 1.18E-09 | 0.001                           | 0.230 | 0.009 | 0.94    | -0.002     | 0.232 | 0.013 | 0.43     |
| rs2412137 <sup>a</sup>     | 11  | 3090205   | A  | G  | F   | 23.23 | 0.024     | 0.005 | 1.81E-06 | 0.007                           | 0.380 | 0.008 | 0.42    | 0.018      | 0.381 | 0.011 | 0.05     |
| rs2509805 <sup>a,c</sup>   | 11  | 57650796  | T  | C  | F   | 27.77 | 0.027     | 0.005 | 1.47E-07 | 0.013                           | 0.319 | 0.009 | 0.14    | 0.037      | 0.319 | 0.012 | 7.32E-04 |
| rs2514218 <sup>a</sup>     | 11  | 113392994 | T  | C  | F   | 25.81 | -0.025    | 0.005 | 4.90E-07 | -0.007                          | 0.355 | 0.008 | 0.40    | -0.030     | 0.354 | 0.011 | 0.003    |
| rs326783                   | 11  | 29633243  | A  | T  | T   | 26.01 | -0.026    | 0.005 | 3.27E-07 | -0.015                          | 0.642 | 0.008 | 0.08    | -0.019     | 0.642 | 0.011 | 0.05     |
| rs7118275 <sup>a</sup>     | 11  | 16271678  | T  | C  | F   | 24.02 | 0.029     | 0.006 | 1.09E-06 | 0.008                           | 0.793 | 0.010 | 0.38    | 0.023      | 0.795 | 0.013 | 0.04     |
| rs7130926                  | 11  | 113496928 | T  | C  | F   | 22.13 | -0.033    | 0.007 | 2.22E-06 | -0.020                          | 0.857 | 0.011 | 0.09    | -0.016     | 0.858 | 0.015 | 0.15     |
| rs2956287 <sup>a</sup>     | 12  | 84709216  | A  | G  | F   | 21.50 | -0.026    | 0.006 | 3.70E-06 | -0.019                          | 0.748 | 0.009 | 0.03    | -0.030     | 0.747 | 0.012 | 0.007    |
| rs4074723 <sup>a</sup>     | 12  | 23947737  | A  | C  | F   | 30.37 | -0.027    | 0.005 | 3.12E-08 | 0.000                           | 0.410 | 0.008 | 0.97    | -0.026     | 0.409 | 0.011 | 0.009    |
| rs58235352                 | 12  | 121186246 | A  | G  | F   | 27.92 | -0.058    | 0.011 | 1.29E-07 | -0.023                          | 0.053 | 0.018 | 0.19    | -0.031     | 0.054 | 0.024 | 0.10     |
| rs12552                    | 13  | 53625781  | A  | G  | F   | 79.87 | 0.043     | 0.005 | 6.07E-19 | 0.008                           | 0.436 | 0.008 | 0.30    | 0.016      | 0.436 | 0.011 | 0.07     |
| rs548886                   | 13  | 75792799  | A  | C  | F   | 25.79 | 0.026     | 0.005 | 3.19E-07 | -0.006                          | 0.344 | 0.008 | 0.49    | 0.005      | 0.342 | 0.011 | 0.33     |
| rs574593                   | 13  | 27118279  | T  | C  | F   | 26.66 | -0.028    | 0.006 | 2.11E-07 | 0.005                           | 0.272 | 0.009 | 0.60    | -0.011     | 0.271 | 0.012 | 0.19     |
| rs9592461 <sup>a,b,c</sup> | 13  | 66941792  | A  | G  | F   | 27.14 | 0.025     | 0.005 | 1.77E-07 | 0.012                           | 0.478 | 0.008 | 0.14    | 0.030      | 0.479 | 0.011 | 0.003    |
| rs10149470                 | 14  | 104017953 | A  | G  | F   | 35.02 | -0.029    | 0.005 | 3.05E-09 | -0.012                          | 0.486 | 0.008 | 0.13    | -0.017     | 0.488 | 0.011 | 0.06     |
| rs12882789                 | 14  | 32467041  | A  | G  | F   | 21.95 | 0.025     | 0.005 | 2.89E-06 | -0.009                          | 0.729 | 0.009 | 0.34    | 0.008      | 0.729 | 0.012 | 0.26     |
| rs2005864                  | 14  | 75377692  | T  | C  | F   | 33.12 | 0.028     | 0.005 | 6.73E-09 | 0.005                           | 0.439 | 0.008 | 0.53    | 0.002      | 0.438 | 0.011 | 0.43     |
| rs4904738 <sup>a,c,d</sup> | 14  | 42179732  | T  | C  | F   | 34.79 | -0.029    | 0.005 | 2.57E-09 | -0.026                          | 0.573 | 0.008 | 0.001   | -0.037     | 0.574 | 0.011 | 3.33E-04 |
| rs915057                   | 14  | 64686207  | A  | G  | F   | 37.47 | -0.030    | 0.005 | 7.61E-10 | 0.000                           | 0.435 | 0.008 | 0.97    | 0.001      | 0.435 | 0.011 | 0.45     |



| SNP                      | CHR | POS      | EA | OA | PAL | F     | EXPOSURE: |       |          | OUTCOMES:                       |       |       |         |            |       |       |         |
|--------------------------|-----|----------|----|----|-----|-------|-----------|-------|----------|---------------------------------|-------|-------|---------|------------|-------|-------|---------|
|                          |     |          |    |    |     |       | effect    | se    | P-value  | SALICYLIC ACID/ DERIVATIVES USE |       |       |         | OPIOID USE |       |       |         |
|                          |     |          |    |    |     |       |           |       |          | effect                          | eaf   | se    | P-value | effect     | eaf   | se    | P-value |
| rs12440728               | 15  | 36405461 | A  | T  | T   | 25.62 | 0.025     | 0.005 | 3.93E-07 | -0.014                          | 0.407 | 0.008 | 0.08    | 0.013      | 0.408 | 0.011 | 0.12    |
| rs281279 <sup>a</sup>    | 15  | 47660902 | T  | C  | F   | 24.85 | 0.033     | 0.007 | 5.78E-07 | 0.011                           | 0.150 | 0.011 | 0.30    | 0.030      | 0.149 | 0.015 | 0.02    |
| rs4542627 <sup>a</sup>   | 15  | 78070743 | A  | T  | T   | 23.59 | -0.024    | 0.005 | 1.20E-06 | -0.006                          | 0.416 | 0.008 | 0.45    | -0.030     | 0.416 | 0.011 | 0.003   |
| rs8025231                | 15  | 37648402 | A  | C  | F   | 49.87 | -0.034    | 0.005 | 2.36E-12 | -0.016                          | 0.552 | 0.008 | 0.05    | -0.024     | 0.553 | 0.011 | 0.014   |
| rs11643192               | 16  | 72214276 | A  | C  | F   | 30.37 | 0.027     | 0.005 | 3.36E-08 | 0.006                           | 0.389 | 0.008 | 0.43    | -0.001     | 0.389 | 0.011 | 0.45    |
| rs11649444 <sup>a</sup>  | 16  | 83435153 | C  | G  | T   | 21.72 | -0.025    | 0.005 | 3.44E-06 | -0.012                          | 0.712 | 0.009 | 0.16    | -0.022     | 0.712 | 0.012 | 0.03    |
| rs1542919                | 16  | 19844790 | C  | G  | T   | 23.55 | -0.030    | 0.006 | 1.14E-06 | -0.002                          | 0.787 | 0.010 | 0.82    | -0.003     | 0.788 | 0.013 | 0.40    |
| rs67253370               | 16  | 52294303 | A  | T  | T   | 22.33 | -0.029    | 0.006 | 2.61E-06 | -0.014                          | 0.183 | 0.010 | 0.19    | -0.003     | 0.184 | 0.014 | 0.42    |
| rs7198928                | 16  | 7666402  | T  | C  | F   | 32.27 | 0.028     | 0.005 | 1.00E-08 | -0.005                          | 0.617 | 0.008 | 0.52    | 0.005      | 0.617 | 0.011 | 0.34    |
| rs8063603                | 16  | 6310645  | A  | G  | F   | 33.77 | -0.031    | 0.005 | 6.87E-09 | -0.008                          | 0.682 | 0.009 | 0.37    | -0.007     | 0.683 | 0.012 | 0.26    |
| rs17727765               | 17  | 27576962 | T  | C  | F   | 33.32 | -0.051    | 0.009 | 8.51E-09 | 0.016                           | 0.924 | 0.015 | 0.30    | 0.018      | 0.924 | 0.021 | 0.19    |
| rs11663393 <sup>a</sup>  | 18  | 50614732 | A  | G  | F   | 32.19 | 0.028     | 0.005 | 1.65E-08 | 0.005                           | 0.461 | 0.008 | 0.52    | 0.030      | 0.462 | 0.011 | 0.003   |
| rs12958048               | 18  | 53101598 | A  | G  | F   | 43.93 | 0.034     | 0.005 | 3.61E-11 | 0.001                           | 0.333 | 0.008 | 0.93    | 0.013      | 0.335 | 0.011 | 0.13    |
| rs62099069               | 18  | 36883737 | A  | T  | T   | 32.41 | -0.028    | 0.005 | 1.31E-08 | 0.007                           | 0.422 | 0.008 | 0.41    | -0.007     | 0.421 | 0.011 | 0.26    |
| rs75344947               | 18  | 40940932 | T  | C  | F   | 24.01 | -0.034    | 0.007 | 1.01E-06 | -0.002                          | 0.863 | 0.012 | 0.83    | -0.011     | 0.863 | 0.016 | 0.25    |
| rs28567442               | 19  | 30930222 | T  | C  | F   | 26.63 | 0.026     | 0.005 | 2.57E-07 | 0.009                           | 0.590 | 0.008 | 0.27    | 0.006      | 0.591 | 0.011 | 0.29    |
| rs7248751                | 19  | 32447377 | A  | G  | F   | 21.05 | -0.023    | 0.005 | 3.99E-06 | 0.014                           | 0.324 | 0.009 | 0.10    | -0.004     | 0.323 | 0.012 | 0.35    |
| rs11697370 <sup>b</sup>  | 20  | 47731767 | T  | C  | F   | 21.71 | -0.023    | 0.005 | 3.53E-06 | 0.000                           | 0.378 | 0.008 | 0.96    | -0.012     | 0.376 | 0.011 | 0.13    |
| rs41278104               | 20  | 39990700 | T  | C  | F   | 29.55 | -0.034    | 0.006 | 7.13E-08 | 0.009                           | 0.819 | 0.010 | 0.36    | 0.011      | 0.818 | 0.014 | 0.21    |
| rs6063085 <sup>a,c</sup> | 20  | 45840459 | A  | C  | F   | 24.60 | 0.025     | 0.005 | 7.84E-07 | 0.006                           | 0.626 | 0.008 | 0.46    | 0.023      | 0.625 | 0.011 | 0.019   |
| rs372519 <sup>a,d</sup>  | 21  | 46574554 | A  | G  | F   | 22.37 | 0.023     | 0.005 | 2.94E-06 | 0.021                           | 0.538 | 0.008 | 0.009   | 0.022      | 0.538 | 0.011 | 0.02    |
| rs2267983                | 22  | 50698157 | A  | C  | F   | 28.32 | -0.028    | 0.005 | 1.00E-07 | 0.005                           | 0.327 | 0.008 | 0.56    | -0.009     | 0.326 | 0.011 | 0.22    |
| rs415551                 | 22  | 34152661 | T  | G  | F   | 21.69 | 0.033     | 0.007 | 2.78E-06 | -0.019                          | 0.138 | 0.011 | 0.09    | -0.009     | 0.139 | 0.016 | 0.29    |
| rs5758265                | 22  | 41617897 | A  | G  | F   | 32.97 | 0.031     | 0.005 | 7.55E-09 | 0.004                           | 0.285 | 0.009 | 0.61    | 0.010      | 0.285 | 0.012 | 0.19    |
|                          |     |          |    |    |     |       |           |       |          |                                 |       |       |         |            |       |       |         |

<sup>a</sup> Identified as potentially invalid instrument due to reverse causation by Steiger filtering for exposure on outcome Opioid Use.

<sup>b</sup> Identified as potentially invalid instrument due to reverse causation by Steiger filtering for exposure on outcome Anilide Use.

<sup>c</sup> Identified as potentially invalid instrument due to reverse causation by Steiger filtering for exposure on outcome NSAID Use

<sup>d</sup> Identified as potentially invalid instrument due to reverse causation by Steiger filtering for exposure on outcome Salicylic Acid Use.

|                                                          |
|----------------------------------------------------------|
| <b>Abbreviations:</b>                                    |
| MDD: Major depressive disorder/ major depression outcome |
| ASRD: Anxiety and stress-related disorders outcome       |
| SNP: Single nucleotide polymorphism - genetic instrument |
| CHR: Chromosome                                          |
| POS: Position                                            |
| beta: SNP effect                                         |
| se: standard error of SNP effect                         |
| P-value: P-value associated with SNP effect              |
| N: GWAS sample size                                      |
| F: F statistic                                           |

**eTable 9. Multivariable Instrument for Medications Use Independent Instruments for Prescription Opioid and Non-Opioid Pain Medications: Harmonized Data**

|             |     |           |    |    | EXPOSURES: |       |          |           |       |          |             |       |          |                    |       |          |
|-------------|-----|-----------|----|----|------------|-------|----------|-----------|-------|----------|-------------|-------|----------|--------------------|-------|----------|
|             |     |           |    |    | OPIOID USE |       |          | NSAID USE |       |          | ANILIDE USE |       |          | SALICYLIC ACID USE |       |          |
| SNP         | CHR | POS       | EA | OA | effect     | se    | P-value  | effect    | se    | P-value  | effect      | se    | P-value  | effect             | se    | P-value  |
| rs11206268  | 1   | 54445348  | G  | A  | -0.051     | 0.021 | 0.02     | -0.034    | 0.014 | 0.01     | -0.049      | 0.013 | 2.20E-04 | -0.075             | 0.016 | 2.20E-06 |
| rs113242618 | 1   | 234118046 | A  | G  | -0.161     | 0.045 | 3.30E-04 | -0.119    | 0.029 | 4.20E-05 | -0.041      | 0.028 | 0.14     | -0.154             | 0.033 | 3.40E-06 |
| rs12238134  | 1   | 128746612 | A  | G  | -0.071     | 0.012 | 8.20E-10 | -0.011    | 0.007 | 0.15     | -0.010      | 0.007 | 0.16     | -0.010             | 0.009 | 0.24     |
| rs12409445  | 1   | 192403191 | C  | T  | -0.029     | 0.014 | 0.04     | -0.045    | 0.009 | 6.80E-07 | -0.030      | 0.009 | 3.60E-04 | -0.006             | 0.010 | 0.59     |
| rs12568655  | 1   | 174434332 | A  | G  | -0.041     | 0.011 | 2.20E-04 | -0.023    | 0.007 | 0.001    | -0.041      | 0.007 | 1.20E-09 | -0.041             | 0.008 | 6.10E-07 |
| rs138200696 | 1   | 117727725 | C  | A  | 0.199      | 0.042 | 2.80E-06 | 0.076     | 0.027 | 0.01     | 0.064       | 0.026 | 0.01     | 0.079              | 0.031 | 0.01     |
| rs1632360   | 1   | 154267672 | G  | A  | 0.069      | 0.024 | 0.003    | 0.079     | 0.015 | 2.00E-07 | 0.055       | 0.014 | 1.20E-04 | 0.006              | 0.017 | 0.71     |
| rs2430157   | 1   | 187819353 | T  | C  | -0.024     | 0.011 | 0.03     | -0.022    | 0.007 | 0.001    | -0.031      | 0.007 | 2.60E-06 | -0.019             | 0.008 | 0.02     |
| rs2618039   | 1   | 112324111 | T  | A  | 0.061      | 0.011 | 3.20E-08 | 0.020     | 0.007 | 0.005    | 0.022       | 0.007 | 9.90E-04 | 0.027              | 0.008 | 9.40E-04 |
| rs3737240   | 1   | 150483355 | T  | C  | -0.034     | 0.011 | 0.002    | -0.037    | 0.007 | 1.80E-07 | -0.024      | 0.007 | 2.90E-04 | -0.016             | 0.008 | 0.05     |
| rs4110942   | 1   | 29337802  | G  | A  | -0.028     | 0.019 | 0.14     | -0.056    | 0.012 | 3.90E-06 | -0.036      | 0.012 | 0.002    | -0.012             | 0.014 | 0.39     |
| rs945211    | 1   | 32191798  | G  | C  | -0.051     | 0.011 | 3.20E-06 | -0.006    | 0.007 | 0.37     | -0.010      | 0.007 | 0.16     | -0.007             | 0.008 | 0.36     |
| rs138405014 | 2   | 221947203 | A  | G  | -0.218     | 0.048 | 4.60E-06 | 0.021     | 0.030 | 0.50     | -0.019      | 0.028 | 0.51     | -0.076             | 0.035 | 0.03     |
| rs139152977 | 2   | 199098906 | A  | T  | 0.164      | 0.034 | 1.90E-06 | 0.043     | 0.022 | 0.05     | 0.056       | 0.021 | 0.007    | 0.057              | 0.025 | 0.02     |
| rs3821269   | 2   | 70698590  | A  | G  | 0.037      | 0.011 | 5.90E-04 | 0.038     | 0.007 | 5.90E-08 | 0.017       | 0.007 | 0.01     | 0.013              | 0.008 | 0.11     |
| rs41272663  | 2   | 211302627 | A  | C  | -0.037     | 0.012 | 0.002    | -0.021    | 0.008 | 0.006    | -0.035      | 0.007 | 2.40E-06 | 0.003              | 0.009 | 0.75     |
| rs4299376   | 2   | 44072576  | G  | T  | 0.012      | 0.012 | 0.280    | -0.018    | 0.007 | 0.02     | -0.011      | 0.007 | 0.11     | 0.045              | 0.008 | 8.60E-08 |
| rs4663983   | 2   | 234815005 | G  | A  | -0.050     | 0.014 | 2.20E-04 | -0.036    | 0.009 | 4.00E-05 | -0.056      | 0.008 | 1.70E-11 | -0.026             | 0.010 | 0.01     |
| rs62180637  | 2   | 217424243 | C  | T  | -0.040     | 0.011 | 1.70E-04 | -0.021    | 0.007 | 0.003    | -0.031      | 0.007 | 1.80E-06 | -0.022             | 0.008 | 0.006    |
| rs7567892   | 2   | 242470476 | T  | C  | 0.050      | 0.018 | 0.006    | 0.042     | 0.012 | 2.90E-04 | 0.061       | 0.011 | 2.00E-08 | 0.034              | 0.013 | 0.01     |
| rs896232    | 2   | 2732877   | T  | C  | -0.013     | 0.011 | 0.26     | -0.019    | 0.007 | 0.008    | -0.016      | 0.007 | 0.02     | -0.040             | 0.008 | 1.50E-06 |

|             |     |           |    |    | EXPOSURES: |       |          |           |       |          |             |       |          |                    |       |          |
|-------------|-----|-----------|----|----|------------|-------|----------|-----------|-------|----------|-------------|-------|----------|--------------------|-------|----------|
|             |     |           |    |    | OPIOID USE |       |          | NSAID USE |       |          | ANILIDE USE |       |          | SALICYLIC ACID USE |       |          |
| SNP         | CHR | POS       | EA | OA | effect     | se    | P-value  | effect    | se    | P-value  | effect      | se    | P-value  | effect             | se    | P-value  |
| rs140729888 | 3   | 10521537  | C  | T  | -0.205     | 0.045 | 4.30E-06 | 0.001     | 0.029 | 0.96     | -0.003      | 0.027 | 0.91     | -0.007             | 0.032 | 0.84     |
| rs521956    | 3   | 173117975 | T  | C  | -0.054     | 0.011 | 5.10E-07 | -0.008    | 0.007 | 0.26     | -0.021      | 0.007 | 0.001    | -0.019             | 0.008 | 0.02     |
| rs7428430   | 3   | 50174184  | T  | C  | -0.065     | 0.011 | 1.20E-09 | -0.020    | 0.007 | 0.004    | -0.018      | 0.007 | 0.007    | -0.023             | 0.008 | 0.003    |
| rs7631941   | 3   | 80480052  | T  | C  | 0.073      | 0.016 | 4.90E-06 | 0.011     | 0.010 | 0.30     | 0.028       | 0.010 | 0.004    | 0.041              | 0.012 | 5.50E-04 |
| rs9865841   | 3   | 135876125 | A  | G  | -0.051     | 0.013 | 8.30E-05 | -0.032    | 0.008 | 1.20E-04 | -0.012      | 0.008 | 0.14     | -0.045             | 0.010 | 2.30E-06 |
| rs10033431  | 4   | 67782113  | C  | T  | 0.049      | 0.012 | 5.00E-05 | 0.020     | 0.008 | 0.009    | 0.038       | 0.007 | 4.10E-07 | 0.025              | 0.009 | 0.006    |
| rs13135092  | 4   | 103198082 | G  | A  | 0.099      | 0.020 | 5.20E-07 | 0.052     | 0.013 | 3.80E-05 | 0.040       | 0.012 | 7.40E-04 | 0.019              | 0.015 | 0.20     |
| rs1397440   | 4   | 140892872 | T  | C  | -0.053     | 0.012 | 3.50E-06 | -0.034    | 0.007 | 4.60E-06 | -0.026      | 0.007 | 1.80E-04 | -0.011             | 0.009 | 0.18     |
| rs17449582  | 4   | 87240157  | T  | C  | 0.013      | 0.011 | 0.23     | 0.011     | 0.007 | 0.11     | 0.034       | 0.007 | 4.20E-07 | 0.012              | 0.008 | 0.13     |
| rs1825548   | 4   | 20150967  | T  | A  | 0.048      | 0.016 | 0.003    | 0.023     | 0.010 | 0.03     | 0.023       | 0.010 | 0.02     | 0.055              | 0.012 | 3.90E-06 |
| rs4356969   | 4   | 112302592 | C  | G  | -0.041     | 0.012 | 8.90E-04 | -0.022    | 0.008 | 0.005    | -0.036      | 0.008 | 1.40E-06 | -0.015             | 0.009 | 0.09     |
| rs76034781  | 4   | 3272782   | A  | G  | 0.098      | 0.020 | 1.20E-06 | 0.002     | 0.013 | 0.87     | 0.007       | 0.012 | 0.57     | 0.027              | 0.015 | 0.07     |
| rs7687973   | 4   | 81139104  | C  | T  | -0.029     | 0.013 | 0.03     | -0.044    | 0.008 | 1.00E-07 | -0.024      | 0.008 | 0.002    | -0.010             | 0.010 | 0.32     |
| rs11743674  | 5   | 151418837 | C  | G  | 0.061      | 0.013 | 2.60E-06 | 0.009     | 0.008 | 0.28     | 0.016       | 0.008 | 0.05     | 0.027              | 0.009 | 0.005    |
| rs12522598  | 5   | 120174466 | G  | A  | 0.033      | 0.012 | 0.006    | 0.045     | 0.008 | 3.00E-09 | 0.023       | 0.007 | 0.001    | 0.015              | 0.009 | 0.10     |
| rs359431    | 5   | 173288534 | C  | T  | 0.024      | 0.011 | 0.03     | 0.037     | 0.007 | 1.30E-07 | 0.016       | 0.007 | 0.01     | 0.016              | 0.008 | 0.05     |
| rs62378567  | 5   | 173106225 | G  | A  | -0.037     | 0.038 | 0.34     | -0.041    | 0.025 | 0.10     | -0.116      | 0.024 | 1.00E-06 | -0.046             | 0.028 | 0.11     |
| rs6891880   | 5   | 149972794 | G  | A  | -0.017     | 0.011 | 0.13     | -0.038    | 0.007 | 4.90E-08 | -0.007      | 0.007 | 0.27     | -0.016             | 0.008 | 0.05     |
| rs11242905  | 6   | 474405    | C  | T  | 0.021      | 0.016 | 0.20     | 0.029     | 0.010 | 0.01     | 0.045       | 0.010 | 4.30E-06 | 0.020              | 0.012 | 0.10     |
| rs114212906 | 6   | 31391389  | T  | C  | 0.097      | 0.026 | 1.70E-04 | 0.092     | 0.016 | 1.70E-08 | 0.036       | 0.016 | 0.02     | 0.040              | 0.019 | 0.04     |
| rs117733303 | 6   | 160922870 | G  | A  | 0.056      | 0.040 | 0.16     | -0.042    | 0.026 | 0.10     | -0.004      | 0.024 | 0.87     | 0.185              | 0.028 | 8.90E-11 |
| rs1589738   | 6   | 147967761 | A  | G  | 0.021      | 0.011 | 0.06     | 0.033     | 0.007 | 3.60E-06 | 0.014       | 0.007 | 0.04     | 0.016              | 0.008 | 0.05     |
| rs1931656   | 6   | 82610188  | A  | T  | 0.022      | 0.011 | 0.04     | 0.003     | 0.007 | 0.71     | 0.014       | 0.007 | 0.03     | 0.037              | 0.008 | 4.00E-06 |
| rs2237257   | 6   | 112005126 | G  | T  | -0.023     | 0.016 | 0.15     | -0.052    | 0.011 | 1.10E-06 | -0.018      | 0.010 | 0.07     | -0.033             | 0.012 | 0.006    |

|             |     |           |    |    | EXPOSURES: |       |          |           |       |          |             |       |          |                    |       |          |
|-------------|-----|-----------|----|----|------------|-------|----------|-----------|-------|----------|-------------|-------|----------|--------------------|-------|----------|
|             |     |           |    |    | OPIOID USE |       |          | NSAID USE |       |          | ANILIDE USE |       |          | SALICYLIC ACID USE |       |          |
| SNP         | CHR | POS       | EA | OA | effect     | se    | P-value  | effect    | se    | P-value  | effect      | se    | P-value  | effect             | se    | P-value  |
| rs6568392   | 6   | 96861476  | G  | T  | 0.037      | 0.013 | 0.004    | 0.031     | 0.008 | 2.30E-04 | 0.040       | 0.008 | 3.60E-07 | 0.000              | 0.010 | 0.98     |
| rs74617384  | 6   | 160997118 | T  | A  | 0.041      | 0.020 | 0.04     | -0.042    | 0.013 | 0.001    | -0.009      | 0.012 | 0.44     | 0.105              | 0.014 | 2.70E-13 |
| rs4718618   | 7   | 67224778  | A  | G  | 0.026      | 0.014 | 0.06     | 0.025     | 0.009 | 0.005    | 0.040       | 0.008 | 2.70E-06 | 0.020              | 0.010 | 0.05     |
| rs56226325  | 7   | 2078981   | T  | C  | -0.074     | 0.015 | 4.90E-07 | -0.021    | 0.010 | 0.03     | -0.022      | 0.009 | 0.01     | -0.057             | 0.011 | 2.20E-07 |
| rs73168813  | 7   | 135846513 | C  | G  | 0.065      | 0.037 | 0.08     | 0.068     | 0.024 | 0.005    | 0.106       | 0.022 | 2.10E-06 | -0.005             | 0.028 | 0.87     |
| rs117710046 | 8   | 59430010  | T  | C  | 0.210      | 0.043 | 1.20E-06 | 0.035     | 0.028 | 0.21     | 0.072       | 0.026 | 0.006    | 0.072              | 0.031 | 0.02     |
| rs11993835  | 8   | 88867707  | A  | G  | -0.006     | 0.016 | 0.71     | -0.049    | 0.010 | 1.70E-06 | -0.026      | 0.010 | 0.008    | -0.001             | 0.012 | 0.91     |
| rs1519369   | 8   | 139393909 | T  | C  | -0.053     | 0.012 | 4.00E-06 | -0.010    | 0.007 | 0.17     | -0.003      | 0.007 | 0.63     | -0.021             | 0.009 | 0.01     |
| rs28601761  | 8   | 126500031 | G  | C  | -0.028     | 0.011 | 0.01     | 0.008     | 0.007 | 0.24     | 0.000       | 0.007 | 0.99     | -0.061             | 0.008 | 1.30E-13 |
| rs75278536  | 8   | 19821425  | G  | T  | -0.044     | 0.017 | 0.01     | -0.036    | 0.011 | 0.001    | -0.028      | 0.011 | 0.009    | -0.067             | 0.013 | 1.60E-07 |
| rs75786943  | 8   | 97103955  | C  | G  | 0.005      | 0.043 | 0.91     | 0.050     | 0.028 | 0.07     | 0.010       | 0.026 | 0.69     | 0.149              | 0.031 | 1.60E-06 |
| rs17487601  | 9   | 37213641  | A  | G  | -0.055     | 0.011 | 7.70E-07 | -0.007    | 0.007 | 0.30     | -0.015      | 0.007 | 0.03     | -0.009             | 0.008 | 0.29     |
| rs4741328   | 9   | 13764507  | C  | T  | -0.038     | 0.011 | 6.60E-04 | -0.020    | 0.007 | 0.005    | -0.033      | 0.007 | 1.10E-06 | -0.008             | 0.008 | 0.30     |
| rs71510292  | 9   | 91898790  | C  | T  | 0.016      | 0.025 | 0.54     | 0.082     | 0.016 | 5.40E-07 | 0.032       | 0.015 | 0.04     | 0.021              | 0.019 | 0.27     |
| rs73531210  | 9   | 112519447 | T  | C  | -0.108     | 0.024 | 8.20E-06 | -0.060    | 0.016 | 1.50E-04 | -0.070      | 0.015 | 2.50E-06 | -0.071             | 0.018 | 8.90E-05 |
| rs7856204   | 9   | 95173814  | C  | G  | 0.042      | 0.011 | 1.50E-04 | 0.034     | 0.007 | 1.80E-06 | 0.019       | 0.007 | 0.005    | 0.009              | 0.008 | 0.27     |
| rs7860752   | 9   | 81389671  | G  | A  | 0.069      | 0.014 | 3.40E-07 | 0.011     | 0.009 | 0.20     | 0.008       | 0.008 | 0.32     | -0.003             | 0.010 | 0.73     |
| rs10508267  | 10  | 3846959   | C  | G  | -0.018     | 0.011 | 0.11     | -0.016    | 0.007 | 0.03     | -0.022      | 0.007 | 0.002    | -0.039             | 0.008 | 2.70E-06 |
| rs10887793  | 10  | 89990905  | T  | G  | 0.035      | 0.011 | 0.001    | 0.009     | 0.007 | 0.19     | 0.012       | 0.007 | 0.08     | 0.043              | 0.008 | 1.00E-07 |
| rs113041162 | 10  | 71106964  | A  | G  | 0.028      | 0.015 | 0.06     | 0.050     | 0.010 | 3.20E-07 | 0.035       | 0.009 | 1.80E-04 | 0.009              | 0.011 | 0.41     |
| rs11597763  | 10  | 98244903  | G  | A  | 0.030      | 0.013 | 0.02     | 0.043     | 0.009 | 5.30E-07 | 0.030       | 0.008 | 2.20E-04 | 0.036              | 0.010 | 2.70E-04 |
| rs12357321  | 10  | 21790476  | A  | G  | 0.063      | 0.012 | 7.10E-08 | 0.020     | 0.008 | 0.01     | 0.026       | 0.007 | 2.40E-04 | 0.012              | 0.009 | 0.16     |
| rs4258296   | 10  | 134953361 | C  | T  | 0.056      | 0.011 | 6.50E-07 | 0.017     | 0.007 | 0.02     | 0.019       | 0.007 | 0.006    | 0.026              | 0.008 | 0.001    |
| rs12285912  | 11  | 126727315 | G  | A  | 0.022      | 0.034 | 0.51     | 0.103     | 0.022 | 1.70E-06 | 0.057       | 0.021 | 0.005    | 0.034              | 0.025 | 0.18     |

|             |     |           |    |    | EXPOSURES: |       |          |           |       |          |             |       |          |                    |       |          |
|-------------|-----|-----------|----|----|------------|-------|----------|-----------|-------|----------|-------------|-------|----------|--------------------|-------|----------|
|             |     |           |    |    | OPIOID USE |       |          | NSAID USE |       |          | ANILIDE USE |       |          | SALICYLIC ACID USE |       |          |
| SNP         | CHR | POS       | EA | OA | effect     | se    | P-value  | effect    | se    | P-value  | effect      | se    | P-value  | effect             | se    | P-value  |
| rs1544861   | 11  | 10679441  | T  | C  | -0.021     | 0.011 | 0.07     | -0.037    | 0.007 | 6.60E-07 | -0.016      | 0.007 | 0.02     | -0.022             | 0.008 | 0.008    |
| rs59681006  | 11  | 70179401  | C  | T  | -0.002     | 0.016 | 0.91     | 0.000     | 0.010 | 0.97     | -0.032      | 0.010 | 9.40E-04 | -0.057             | 0.012 | 1.70E-06 |
| rs7110825   | 11  | 46120317  | C  | T  | 0.057      | 0.012 | 2.30E-06 | 0.011     | 0.008 | 0.15     | 0.015       | 0.007 | 0.05     | 0.010              | 0.009 | 0.27     |
| rs77507211  | 11  | 24918930  | T  | G  | 0.086      | 0.041 | 0.04     | 0.039     | 0.026 | 0.13     | 0.055       | 0.025 | 0.03     | 0.137              | 0.030 | 4.80E-06 |
| rs964184    | 11  | 116648917 | G  | C  | 0.017      | 0.016 | 0.28     | -0.014    | 0.010 | 0.17     | -0.022      | 0.010 | 0.02     | 0.063              | 0.012 | 4.90E-08 |
| rs11171710  | 12  | 56368078  | A  | G  | 0.026      | 0.011 | 0.02     | 0.034     | 0.007 | 1.40E-06 | 0.026       | 0.007 | 9.10E-05 | 0.025              | 0.008 | 0.002    |
| rs11172113  | 12  | 57527283  | C  | T  | -0.011     | 0.011 | 0.32     | -0.052    | 0.007 | 1.00E-13 | -0.053      | 0.007 | 8.90E-16 | -0.019             | 0.008 | 0.02     |
| rs12580718  | 12  | 67407656  | A  | G  | -0.033     | 0.011 | 0.003    | -0.026    | 0.007 | 2.90E-04 | -0.013      | 0.007 | 0.05     | -0.039             | 0.008 | 2.20E-06 |
| rs1458612   | 12  | 75483802  | T  | C  | -0.026     | 0.012 | 0.03     | -0.035    | 0.008 | 3.70E-06 | -0.022      | 0.007 | 0.002    | -0.010             | 0.009 | 0.25     |
| rs4763505   | 12  | 10477712  | T  | A  | -0.053     | 0.012 | 4.50E-06 | -0.021    | 0.007 | 0.004    | -0.011      | 0.007 | 0.11     | -0.006             | 0.009 | 0.45     |
| rs7315004   | 12  | 31928182  | A  | T  | -0.012     | 0.011 | 0.27     | 0.004     | 0.007 | 0.57     | -0.007      | 0.007 | 0.28     | -0.041             | 0.008 | 4.60E-07 |
| rs1960743   | 13  | 83832609  | A  | G  | 0.023      | 0.017 | 0.18     | 0.029     | 0.011 | 0.009    | 0.023       | 0.011 | 0.03     | 0.059              | 0.013 | 4.00E-06 |
| rs4995008   | 13  | 106831286 | A  | G  | 0.036      | 0.016 | 0.02     | 0.023     | 0.010 | 0.02     | 0.014       | 0.010 | 0.16     | 0.054              | 0.012 | 4.30E-06 |
| rs56262049  | 13  | 42644705  | C  | T  | -0.066     | 0.014 | 2.50E-06 | -0.006    | 0.009 | 0.50     | -0.013      | 0.009 | 0.14     | -0.014             | 0.010 | 0.17     |
| rs7319102   | 13  | 58252801  | G  | A  | 0.060      | 0.013 | 2.40E-06 | 0.018     | 0.008 | 0.03     | 0.022       | 0.008 | 0.006    | 0.024              | 0.009 | 0.01     |
| rs9571576   | 13  | 66936133  | C  | T  | 0.030      | 0.011 | 0.006    | 0.033     | 0.007 | 1.80E-06 | 0.032       | 0.007 | 1.20E-06 | 0.014              | 0.008 | 0.08     |
| rs2526922   | 14  | 73101118  | A  | G  | -0.013     | 0.011 | 0.22     | -0.022    | 0.007 | 0.002    | -0.030      | 0.007 | 3.50E-06 | -0.014             | 0.008 | 0.08     |
| rs56044130  | 14  | 94821812  | G  | A  | 0.056      | 0.018 | 0.002    | 0.058     | 0.012 | 9.40E-07 | 0.035       | 0.011 | 0.002    | 0.022              | 0.014 | 0.10     |
| rs7154623   | 14  | 73798243  | G  | A  | 0.064      | 0.014 | 2.40E-06 | 0.022     | 0.009 | 0.01     | 0.014       | 0.008 | 0.09     | 0.020              | 0.010 | 0.05     |
| rs8013531   | 14  | 23247687  | T  | C  | 0.007      | 0.011 | 0.51     | 0.034     | 0.007 | 1.40E-06 | 0.016       | 0.007 | 0.02     | 0.013              | 0.008 | 0.10     |
| rs950100    | 14  | 42971842  | A  | G  | -0.030     | 0.021 | 0.16     | -0.033    | 0.014 | 0.02     | -0.026      | 0.013 | 0.04     | -0.072             | 0.016 | 4.50E-06 |
| rs113544339 | 15  | 86576076  | G  | T  | -0.166     | 0.036 | 3.60E-06 | -0.038    | 0.023 | 0.10     | -0.056      | 0.022 | 0.01     | -0.065             | 0.026 | 0.01     |
| rs2289739   | 15  | 41801512  | T  | G  | 0.054      | 0.011 | 2.00E-06 | 0.015     | 0.007 | 0.04     | 0.028       | 0.007 | 4.00E-05 | 0.035              | 0.008 | 3.60E-05 |
| rs75169822  | 15  | 75887405  | G  | A  | 0.059      | 0.012 | 1.30E-06 | 0.037     | 0.008 | 3.00E-06 | 0.031       | 0.007 | 3.30E-05 | 0.016              | 0.009 | 0.08     |

|             |     |          |    |    | EXPOSURES: |       |          |           |       |          |             |       |          |                    |       |          |
|-------------|-----|----------|----|----|------------|-------|----------|-----------|-------|----------|-------------|-------|----------|--------------------|-------|----------|
|             |     |          |    |    | OPIOID USE |       |          | NSAID USE |       |          | ANILIDE USE |       |          | SALICYLIC ACID USE |       |          |
| SNP         | CHR | POS      | EA | OA | effect     | se    | P-value  | effect    | se    | P-value  | effect      | se    | P-value  | effect             | se    | P-value  |
| rs185197153 | 16  | 58450949 | C  | A  | -0.082     | 0.046 | 0.08     | -0.062    | 0.030 | 0.04     | -0.043      | 0.028 | 0.13     | -0.163             | 0.035 | 2.60E-06 |
| rs74618578  | 16  | 54646068 | G  | A  | -0.090     | 0.034 | 0.007    | -0.062    | 0.022 | 0.004    | -0.104      | 0.021 | 4.60E-07 | -0.057             | 0.025 | 0.02     |
| rs975376    | 16  | 73100503 | C  | G  | 0.071      | 0.015 | 1.00E-06 | 0.023     | 0.009 | 0.01     | 0.022       | 0.009 | 0.01     | 0.012              | 0.011 | 0.28     |
| rs9925184   | 16  | 5800933  | C  | T  | 0.010      | 0.011 | 0.37     | 0.011     | 0.007 | 0.11     | 0.033       | 0.007 | 8.10E-07 | 0.008              | 0.008 | 0.31     |
| rs59695806  | 17  | 43156023 | C  | T  | 0.057      | 0.012 | 1.10E-06 | 0.025     | 0.008 | 0.001    | 0.031       | 0.007 | 2.00E-05 | 0.019              | 0.009 | 0.03     |
| rs73998427  | 17  | 70840296 | T  | C  | 0.089      | 0.031 | 0.004    | 0.054     | 0.020 | 0.006    | 0.088       | 0.019 | 2.90E-06 | 0.064              | 0.023 | 0.005    |
| rs9915717   | 17  | 10561049 | A  | G  | 0.031      | 0.014 | 0.02     | 0.024     | 0.009 | 0.005    | 0.042       | 0.008 | 3.10E-07 | 0.022              | 0.010 | 0.03     |
| rs10164103  | 18  | 65419274 | G  | A  | -0.011     | 0.018 | 0.55     | -0.058    | 0.012 | 8.00E-07 | -0.041      | 0.011 | 2.20E-04 | -0.021             | 0.013 | 0.12     |
| rs1942262   | 18  | 52873317 | A  | G  | 0.043      | 0.012 | 3.50E-04 | 0.025     | 0.008 | 0.001    | 0.037       | 0.007 | 3.00E-07 | 0.022              | 0.009 | 0.01     |
| rs7244655   | 18  | 67986087 | A  | G  | -0.017     | 0.012 | 0.16     | -0.022    | 0.008 | 0.006    | -0.012      | 0.008 | 0.10     | -0.043             | 0.009 | 2.20E-06 |
| rs73015016  | 19  | 11191300 | A  | G  | -0.061     | 0.016 | 2.20E-04 | 0.027     | 0.011 | 0.011    | 0.016       | 0.010 | 0.10     | -0.096             | 0.012 | 6.40E-15 |
| rs7412      | 19  | 45412079 | T  | C  | -0.023     | 0.019 | 0.23     | 0.045     | 0.013 | 4.00E-04 | 0.045       | 0.012 | 1.90E-04 | -0.111             | 0.015 | 4.90E-14 |
| rs2297197   | 20  | 44673546 | G  | C  | 0.060      | 0.012 | 7.70E-07 | 0.007     | 0.008 | 0.36     | 0.024       | 0.007 | 0.001    | 0.020              | 0.009 | 0.03     |
| rs6141277   | 20  | 30831157 | C  | G  | 0.052      | 0.011 | 2.20E-06 | 0.014     | 0.007 | 0.04     | 0.020       | 0.007 | 0.003    | 0.017              | 0.008 | 0.04     |
| rs2825128   | 21  | 20172863 | C  | A  | 0.025      | 0.011 | 0.02     | 0.015     | 0.007 | 0.03     | 0.031       | 0.007 | 1.90E-06 | 0.016              | 0.008 | 0.04     |
| rs73228014  | 21  | 42752754 | A  | G  | 0.161      | 0.035 | 3.80E-06 | -0.007    | 0.023 | 0.75     | 0.031       | 0.021 | 0.14     | 0.016              | 0.026 | 0.54     |
| rs139696858 | 22  | 47836888 | A  | G  | 0.016      | 0.045 | 0.73     | -0.037    | 0.030 | 0.21     | -0.008      | 0.028 | 0.77     | -0.164             | 0.034 | 1.60E-06 |
| rs9612563   | 22  | 24597540 | C  | A  | -0.040     | 0.023 | 0.08     | -0.014    | 0.015 | 0.33     | 0.011       | 0.014 | 0.42     | -0.080             | 0.017 | 2.80E-06 |

|            |     |          |    |    | OUTCOMES: |       |         |        |       |         |
|------------|-----|----------|----|----|-----------|-------|---------|--------|-------|---------|
|            |     |          |    |    | MDD       |       |         | ASRD   |       |         |
| SNP        | CHR | POS      | EA | OA | effect    | se    | P-value | effect | se    | P-value |
| rs11206268 | 1   | 54445348 | G  | A  | -0.015    | 0.018 | 0.39    | 0.002  | 0.033 | 0.96    |

|             |     |           |    |    | OUTCOMES: |       |         |        |       |         |
|-------------|-----|-----------|----|----|-----------|-------|---------|--------|-------|---------|
|             |     |           |    |    | MDD       |       |         | ASRD   |       |         |
| SNP         | CHR | POS       | EA | OA | effect    | se    | P-value | effect | se    | P-value |
| rs113242618 | 1   | 234118046 | A  | G  | -0.011    | 0.039 | 0.77    | 0.086  | 0.086 | 0.31    |
| rs12238134  | 1   | 128746612 | A  | G  | -0.003    | 0.010 | 0.75    | -0.023 | 0.019 | 0.24    |
| rs12409445  | 1   | 192403191 | C  | T  | -0.013    | 0.012 | 0.26    | 0.001  | 0.022 | 0.95    |
| rs12568655  | 1   | 174434332 | A  | G  | -0.003    | 0.009 | 0.74    | -0.007 | 0.018 | 0.68    |
| rs138200696 | 1   | 117727725 | C  | A  | 0.044     | 0.044 | 0.32    | NA     | NA    | NA      |
| rs1632360   | 1   | 154267672 | G  | A  | 0.026     | 0.022 | 0.25    | 0.032  | 0.048 | 0.51    |
| rs2430157   | 1   | 187819353 | T  | C  | -0.005    | 0.009 | 0.57    | -0.014 | 0.017 | 0.42    |
| rs2618039   | 1   | 112324111 | T  | A  | 0.007     | 0.009 | 0.47    | 0.007  | 0.018 | 0.68    |
| rs3737240   | 1   | 150483355 | T  | C  | 0.003     | 0.009 | 0.77    | -0.013 | 0.017 | 0.46    |
| rs4110942   | 1   | 29337802  | G  | A  | 0.007     | 0.016 | 0.67    | 0.016  | 0.032 | 0.61    |
| rs945211    | 1   | 32191798  | G  | C  | -0.010    | 0.010 | 0.30    | 0.000  | 0.019 | 0.99    |
| rs138405014 | 2   | 221947203 | A  | G  | 0.028     | 0.052 | 0.59    | 0.211  | 0.079 | 0.008   |
| rs139152977 | 2   | 199098906 | A  | T  | 0.010     | 0.030 | 0.74    | 0.044  | 0.056 | 0.43    |
| rs3821269   | 2   | 70698590  | A  | G  | 0.015     | 0.009 | 0.10    | 0.036  | 0.017 | 0.04    |
| rs41272663  | 2   | 211302627 | A  | C  | 0.002     | 0.011 | 0.81    | -0.005 | 0.021 | 0.79    |
| rs4299376   | 2   | 44072576  | G  | T  | 0.002     | 0.010 | 0.85    | -0.011 | 0.019 | 0.57    |
| rs4663983   | 2   | 234815005 | G  | A  | -0.009    | 0.012 | 0.44    | 0.033  | 0.022 | 0.13    |
| rs62180637  | 2   | 217424243 | C  | T  | -0.020    | 0.009 | 0.03    | 0.006  | 0.018 | 0.72    |
| rs7567892   | 2   | 242470476 | T  | C  | 0.006     | 0.017 | 0.72    | -0.025 | 0.031 | 0.42    |
| rs896232    | 2   | 2732877   | T  | C  | -0.020    | 0.010 | 0.04    | -0.015 | 0.019 | 0.41    |
| rs140729888 | 3   | 10521537  | C  | T  | -0.087    | 0.036 | 0.01    | 0.006  | 0.059 | 0.92    |
| rs521956    | 3   | 173117975 | T  | C  | -0.010    | 0.009 | 0.30    | -0.011 | 0.018 | 0.54    |
| rs7428430   | 3   | 50174184  | T  | C  | -0.012    | 0.009 | 0.19    | -0.037 | 0.017 | 0.04    |
| rs7631941   | 3   | 80480052  | T  | C  | -0.016    | 0.014 | 0.24    | 0.008  | 0.027 | 0.77    |
| rs9865841   | 3   | 135876125 | A  | G  | -0.014    | 0.012 | 0.23    | -0.067 | 0.022 | 0.002   |



|             |     |           |    |    | OUTCOMES: |       |         |        |       |          |
|-------------|-----|-----------|----|----|-----------|-------|---------|--------|-------|----------|
|             |     |           |    |    | MDD       |       |         | ASRD   |       |          |
| SNP         | CHR | POS       | EA | OA | effect    | se    | P-value | effect | se    | P-value  |
| rs10033431  | 4   | 67782113  | C  | T  | 0.007     | 0.010 | 0.52    | 0.003  | 0.020 | 0.87     |
| rs13135092  | 4   | 103198082 | G  | A  | -0.019    | 0.019 | 0.31    | 0.003  | 0.040 | 0.94     |
| rs1397440   | 4   | 140892872 | T  | C  | -0.022    | 0.010 | 0.02    | -0.022 | 0.018 | 0.23     |
| rs17449582  | 4   | 87240157  | T  | C  | -0.007    | 0.010 | 0.44    | -0.007 | 0.018 | 0.70     |
| rs1825548   | 4   | 20150967  | T  | A  | 0.004     | 0.015 | 0.78    | 0.044  | 0.027 | 0.11     |
| rs4356969   | 4   | 112302592 | C  | G  | -0.013    | 0.011 | 0.24    | -0.039 | 0.021 | 0.06     |
| rs76034781  | 4   | 3272782   | A  | G  | 0.038     | 0.021 | 0.07    | 0.096  | 0.031 | 0.002    |
| rs7687973   | 4   | 81139104  | C  | T  | -0.016    | 0.011 | 0.14    | -0.018 | 0.021 | 0.39     |
| rs11743674  | 5   | 151418837 | C  | G  | 0.007     | 0.011 | 0.53    | 0.010  | 0.021 | 0.64     |
| rs12522598  | 5   | 120174466 | G  | A  | 0.015     | 0.010 | 0.13    | 0.046  | 0.019 | 0.02     |
| rs359431    | 5   | 173288534 | C  | T  | -0.003    | 0.009 | 0.71    | 0.006  | 0.017 | 0.72     |
| rs62378567  | 5   | 173106225 | G  | A  | 0.037     | 0.038 | 0.34    | 0.024  | 0.080 | 0.77     |
| rs6891880   | 5   | 149972794 | G  | A  | 0.017     | 0.009 | 0.07    | 0.000  | 0.018 | >0.99    |
| rs11242905  | 6   | 474405    | C  | T  | -0.011    | 0.014 | 0.42    | -0.033 | 0.026 | 0.21     |
| rs114212906 | 6   | 31391389  | T  | C  | -0.002    | 0.022 | 0.93    | -0.029 | 0.040 | 0.47     |
| rs117733303 | 6   | 160922870 | G  | A  | 0.013     | 0.037 | 0.73    | -0.012 | 0.088 | 0.89     |
| rs1589738   | 6   | 147967761 | A  | G  | 0.016     | 0.009 | 0.09    | 0.005  | 0.018 | 0.77     |
| rs1931656   | 6   | 82610188  | A  | T  | -0.002    | 0.009 | 0.85    | 0.005  | 0.017 | 0.79     |
| rs2237257   | 6   | 112005126 | G  | T  | 0.019     | 0.014 | 0.17    | 0.025  | 0.025 | 0.32     |
| rs6568392   | 6   | 96861476  | G  | T  | 0.015     | 0.011 | 0.16    | 0.057  | 0.021 | 0.006    |
| rs74617384  | 6   | 160997118 | T  | A  | 0.008     | 0.018 | 0.65    | -0.005 | 0.033 | 0.88     |
| rs4718618   | 7   | 67224778  | A  | G  | 0.003     | 0.012 | 0.77    | -0.012 | 0.022 | 0.58     |
| rs56226325  | 7   | 2078981   | T  | C  | -0.035    | 0.012 | 0.004   | -0.081 | 0.024 | 6.41E-04 |
| rs73168813  | 7   | 135846513 | C  | G  | -0.052    | 0.045 | 0.25    | NA     | NA    | NA       |
| rs117710046 | 8   | 59430010  | T  | C  | 0.008     | 0.031 | 0.80    | -0.024 | 0.056 | 0.68     |

|             |     |           |    |    | OUTCOMES: |       |         |        |       |         |
|-------------|-----|-----------|----|----|-----------|-------|---------|--------|-------|---------|
|             |     |           |    |    | MDD       |       |         | ASRD   |       |         |
| SNP         | CHR | POS       | EA | OA | effect    | se    | P-value | effect | se    | P-value |
| rs11993835  | 8   | 88867707  | A  | G  | -0.009    | 0.014 | 0.50    | 0.004  | 0.027 | 0.88    |
| rs1519369   | 8   | 139393909 | T  | C  | -0.001    | 0.010 | 0.91    | 0.010  | 0.019 | 0.58    |
| rs28601761  | 8   | 126500031 | G  | C  | -0.005    | 0.009 | 0.58    | 0.000  | 0.017 | 0.99    |
| rs75278536  | 8   | 19821425  | G  | T  | 0.001     | 0.015 | 0.96    | 0.011  | 0.028 | 0.69    |
| rs75786943  | 8   | 97103955  | C  | G  | -0.003    | 0.038 | 0.93    | -0.038 | 0.081 | 0.64    |
| rs17487601  | 9   | 37213641  | A  | G  | -0.005    | 0.010 | 0.62    | -0.015 | 0.018 | 0.41    |
| rs4741328   | 9   | 13764507  | C  | T  | -0.008    | 0.010 | 0.43    | 0.019  | 0.018 | 0.30    |
| rs71510292  | 9   | 91898790  | C  | T  | -0.010    | 0.026 | 0.70    | 0.039  | 0.044 | 0.37    |
| rs73531210  | 9   | 112519447 | T  | C  | 0.006     | 0.020 | 0.74    | 0.001  | 0.039 | 0.98    |
| rs7856204   | 9   | 95173814  | C  | G  | -0.008    | 0.010 | 0.42    | -0.015 | 0.018 | 0.40    |
| rs7860752   | 9   | 81389671  | G  | A  | 0.014     | 0.011 | 0.23    | 0.044  | 0.021 | 0.04    |
| rs10508267  | 10  | 3846959   | C  | G  | 0.008     | 0.010 | 0.41    | -0.025 | 0.019 | 0.18    |
| rs10887793  | 10  | 89990905  | T  | G  | 0.002     | 0.011 | 0.88    | 0.023  | 0.019 | 0.24    |
| rs113041162 | 10  | 71106964  | A  | G  | -0.010    | 0.013 | 0.44    | 0.010  | 0.025 | 0.68    |
| rs11597763  | 10  | 98244903  | G  | A  | 0.003     | 0.012 | 0.81    | -0.003 | 0.022 | 0.90    |
| rs12357321  | 10  | 21790476  | A  | G  | -0.001    | 0.010 | 0.95    | 0.002  | 0.019 | 0.89    |
| rs4258296   | 10  | 134953361 | C  | T  | 0.011     | 0.011 | 0.32    | 0.024  | 0.019 | 0.22    |
| rs12285912  | 11  | 126727315 | G  | A  | 0.019     | 0.028 | 0.49    | -0.010 | 0.058 | 0.86    |
| rs1544861   | 11  | 10679441  | T  | C  | -0.010    | 0.010 | 0.29    | -0.018 | 0.018 | 0.32    |
| rs59681006  | 11  | 70179401  | C  | T  | 0.009     | 0.014 | 0.49    | 0.019  | 0.026 | 0.45    |
| rs7110825   | 11  | 46120317  | C  | T  | 0.014     | 0.010 | 0.18    | 0.011  | 0.019 | 0.56    |
| rs77507211  | 11  | 24918930  | T  | G  | 0.034     | 0.044 | 0.43    | NA     | NA    | NA      |
| rs964184    | 11  | 116648917 | G  | C  | 0.001     | 0.013 | 0.96    | -0.016 | 0.025 | 0.53    |
| rs11171710  | 12  | 56368078  | A  | G  | -0.004    | 0.010 | 0.70    | 0.000  | 0.018 | 0.99    |
| rs11172113  | 12  | 57527283  | C  | T  | -0.013    | 0.010 | 0.18    | -0.026 | 0.017 | 0.14    |

|             |     |           |    |    | OUTCOMES: |       |         |        |       |         |
|-------------|-----|-----------|----|----|-----------|-------|---------|--------|-------|---------|
|             |     |           |    |    | MDD       |       |         | ASRD   |       |         |
| SNP         | CHR | POS       | EA | OA | effect    | se    | P-value | effect | se    | P-value |
| rs12580718  | 12  | 67407656  | A  | G  | -0.011    | 0.009 | 0.25    | 0.003  | 0.018 | 0.87    |
| rs1458612   | 12  | 75483802  | T  | C  | 0.005     | 0.010 | 0.62    | -0.038 | 0.019 | 0.05    |
| rs4763505   | 12  | 10477712  | T  | A  | -0.011    | 0.010 | 0.29    | -0.037 | 0.020 | 0.06    |
| rs7315004   | 12  | 31928182  | A  | T  | 0.018     | 0.009 | 0.06    | 0.026  | 0.018 | 0.14    |
| rs1960743   | 13  | 83832609  | A  | G  | -0.032    | 0.015 | 0.03    | 0.001  | 0.028 | 0.97    |
| rs4995008   | 13  | 106831286 | A  | G  | 0.007     | 0.013 | 0.60    | 0.017  | 0.026 | 0.49    |
| rs56262049  | 13  | 42644705  | C  | T  | -0.011    | 0.012 | 0.35    | -0.026 | 0.022 | 0.25    |
| rs7319102   | 13  | 58252801  | G  | A  | 0.012     | 0.011 | 0.28    | 0.051  | 0.020 | 0.01    |
| rs9571576   | 13  | 66936133  | C  | T  | 0.013     | 0.009 | 0.16    | 0.024  | 0.017 | 0.16    |
| rs2526922   | 14  | 73101118  | A  | G  | 0.006     | 0.009 | 0.48    | 0.017  | 0.017 | 0.32    |
| rs56044130  | 14  | 94821812  | G  | A  | 0.023     | 0.016 | 0.17    | 0.025  | 0.033 | 0.45    |
| rs7154623   | 14  | 73798243  | G  | A  | -0.012    | 0.011 | 0.31    | -0.030 | 0.022 | 0.18    |
| rs8013531   | 14  | 23247687  | T  | C  | -0.001    | 0.010 | 0.94    | NA     | NA    | NA      |
| rs950100    | 14  | 42971842  | A  | G  | -0.004    | 0.019 | 0.81    | 0.001  | 0.035 | 0.97    |
| rs113544339 | 15  | 86576076  | G  | T  | -0.047    | 0.031 | 0.13    | -0.067 | 0.061 | 0.27    |
| rs2289739   | 15  | 41801512  | T  | G  | 0.009     | 0.010 | 0.36    | -0.010 | 0.018 | 0.59    |
| rs75169822  | 15  | 75887405  | G  | A  | -0.010    | 0.010 | 0.33    | -0.001 | 0.019 | 0.97    |
| rs185197153 | 16  | 58450949  | C  | A  | 0.007     | 0.035 | 0.85    | NA     | NA    | NA      |
| rs74618578  | 16  | 54646068  | G  | A  | -0.066    | 0.034 | 0.05    | -0.043 | 0.077 | 0.57    |
| rs975376    | 16  | 73100503  | C  | G  | -0.006    | 0.013 | 0.65    | 0.014  | 0.025 | 0.58    |
| rs9925184   | 16  | 5800933   | C  | T  | 0.004     | 0.009 | 0.66    | -0.002 | 0.018 | 0.90    |
| rs59695806  | 17  | 43156023  | C  | T  | 0.011     | 0.010 | 0.29    | -0.011 | 0.019 | 0.57    |
| rs73998427  | 17  | 70840296  | T  | C  | 0.039     | 0.027 | 0.15    | -0.005 | 0.056 | 0.93    |
| rs9915717   | 17  | 10561049  | A  | G  | 0.007     | 0.012 | 0.56    | 0.005  | 0.022 | 0.84    |
| rs10164103  | 18  | 65419274  | G  | A  | -0.019    | 0.015 | 0.20    | -0.006 | 0.030 | 0.85    |

|             |     |          |    |    | OUTCOMES: |       |         |        |       |         |
|-------------|-----|----------|----|----|-----------|-------|---------|--------|-------|---------|
|             |     |          |    |    | MDD       |       |         | ASRD   |       |         |
| SNP         | CHR | POS      | EA | OA | effect    | se    | P-value | effect | se    | P-value |
| rs1942262   | 18  | 52873317 | A  | G  | 0.025     | 0.010 | 0.01    | 0.026  | 0.019 | 0.16    |
| rs7244655   | 18  | 67986087 | A  | G  | -0.017    | 0.011 | 0.12    | -0.010 | 0.020 | 0.62    |
| rs73015016  | 19  | 11191300 | A  | G  | -0.012    | 0.015 | 0.40    | -0.016 | 0.028 | 0.58    |
| rs7412      | 19  | 45412079 | T  | C  | -0.002    | 0.019 | 0.94    | -0.010 | 0.031 | 0.74    |
| rs2297197   | 20  | 44673546 | G  | C  | 0.028     | 0.010 | 0.006   | 0.028  | 0.020 | 0.15    |
| rs6141277   | 20  | 30831157 | C  | G  | 0.006     | 0.009 | 0.52    | 0.045  | 0.017 | 0.009   |
| rs2825128   | 21  | 20172863 | C  | A  | 0.021     | 0.009 | 0.02    | 0.021  | 0.017 | 0.22    |
| rs73228014  | 21  | 42752754 | A  | G  | 0.010     | 0.052 | 0.85    | NA     | NA    | NA      |
| rs139696858 | 22  | 47836888 | A  | G  | 0.018     | 0.044 | 0.69    | NA     | NA    | NA      |
| rs9612563   | 22  | 24597540 | C  | A  | 0.001     | 0.019 | 0.94    | -0.027 | 0.037 | 0.47    |
|             |     |          |    |    |           |       |         |        |       |         |

| Abbreviations:                                           |
|----------------------------------------------------------|
| MDD: Major depressive disorder/ major depression outcome |
| ASRD: Anxiety and stress-related disorders outcome       |
| SNP: Single nucleotide polymorphism - genetic instrument |
| CHR: Chromosome                                          |
| POS: Position                                            |
| beta: SNP effect                                         |
| se: standard error of SNP effect                         |
| P-value: P-value associated with SNP effect              |
| N: GWAS sample size                                      |

|  |                                                                                                             |  |
|--|-------------------------------------------------------------------------------------------------------------|--|
|  | Opioid Use instrument: conventional significant effect at $P < 5 \times 10^{-6}$                            |  |
|  | NSAID Use instrument: conventional significant effect at $P < 5 \times 10^{-6}$                             |  |
|  | Salicylic Acid Use instrument: conventional significant effect at $P < 5 \times 10^{-6}$                    |  |
|  | Anilide Use instrument: conventional significant effect at $P < 5 \times 10^{-6}$                           |  |
|  | Conventionally significant at nominal $P = 0.05$ adjusted for 111 comparisons ( $P < 4.50 \times 10^{-4}$ ) |  |

**eTable 10. Multivariable Instruments for Prescription Opioid Use and Abdominal/ Stomach Pain for 3+ Months in UKB Participants on MDD and ASRD: Harmonized Data<sup>a</sup>**

|             |     |           |    |    | EXPOSURES: |        |       |          |                                       |        |       |          | OUTCOMES: |       |         |        |       |         |
|-------------|-----|-----------|----|----|------------|--------|-------|----------|---------------------------------------|--------|-------|----------|-----------|-------|---------|--------|-------|---------|
|             |     |           |    |    | OPIOID USE |        |       |          | ABDOMINAL/ STOMACH PAIN FOR 3+ MONTHS |        |       |          | MDD       |       |         | ASRD   |       |         |
| SNP         | CHR | POS       | EA | OA | eaf        | effect | se    | P-value  | eaf                                   | effect | se    | P-value  | effect    | se    | P-value | effect | se    | P-value |
| rs127204    | 1   | 112277693 | C  | A  | 0.400      | 0.059  | 0.011 | 8.50E-08 | 0.402                                 | 0.005  | 0.004 | 0.15     | 0.008     | 0.009 | 0.41    | 0.010  | 0.018 | 0.58    |
| rs945211    | 1   | 32191798  | G  | C  | 0.383      | -0.051 | 0.011 | 3.20E-06 | 0.617                                 | 0.001  | 0.004 | 0.89     | -0.010    | 0.010 | 0.30    | 0.000  | 0.019 | 0.99    |
| rs139152977 | 2   | 199098906 | A  | T  | 0.025      | 0.164  | 0.034 | 1.90E-06 | 0.026                                 | -0.009 | 0.011 | 0.42     | 0.010     | 0.030 | 0.74    | 0.044  | 0.056 | 0.43    |
| rs1437316   | 2   | 139826907 | C  | T  | 0.315      | 0.014  | 0.012 | 0.22     | 0.313                                 | -0.018 | 0.004 | 4.80E-06 | 0.011     | 0.010 | 0.28    | -      | 0.019 | 0.35    |
| rs72822393  | 2   | 104801697 | T  | C  | 0.033      | 0.034  | 0.030 | 0.27     | 0.031                                 | -0.051 | 0.010 | 8.20E-07 | 0.027     | 0.025 | 0.28    | 0.077  | 0.047 | 0.10    |
| rs13086611  | 3   | 49385417  | T  | A  | 0.303      | -0.054 | 0.012 | 3.30E-06 | 0.304                                 | -0.003 | 0.004 | 0.39     | -0.022    | 0.010 | 0.04    | 0.002  | 0.019 | 0.91    |
| rs247975    | 3   | 173107443 | T  | C  | 0.467      | -0.050 | 0.011 | 3.80E-06 | 0.538                                 | -0.002 | 0.004 | 0.61     | -0.006    | 0.009 | 0.53    | -      | 0.017 | 0.97    |
| rs7631941   | 3   | 80480052  | T  | C  | 0.131      | 0.073  | 0.016 | 4.90E-06 | 0.130                                 | 0.016  | 0.005 | 0.003    | -0.016    | 0.014 | 0.24    | 0.008  | 0.027 | 0.77    |
| rs13107325  | 4   | 103188709 | T  | C  | 0.074      | 0.100  | 0.020 | 1.10E-06 | 0.077                                 | 0.007  | 0.007 | 0.31     | -0.027    | 0.020 | 0.17    | -      | 0.041 | 0.75    |
| rs76034781  | 4   | 3272782   | A  | G  | 0.077      | 0.098  | 0.020 | 1.20E-06 | 0.078                                 | 0.013  | 0.007 | 0.05     | 0.038     | 0.021 | 0.07    | 0.096  | 0.031 | 0.002   |
| rs769657    | 4   | 140877659 | G  | A  | 0.330      | -0.053 | 0.011 | 4.80E-06 | 0.326                                 | -0.005 | 0.004 | 0.15     | -0.021    | 0.010 | 0.03    | -      | 0.019 | 0.11    |
| rs78986576  | 4   | 77491598  | T  | C  | 0.015      | 0.000  | 0.045 | >0.99    | 0.017                                 | 0.068  | 0.014 | 2.80E-06 | -0.044    | 0.037 | 0.24    | -      | 0.069 | 0.87    |
| rs116509576 | 5   | 24829795  | T  | C  | 0.034      | 0.022  | 0.030 | 0.47     | 0.040                                 | 0.043  | 0.009 | 4.20E-06 | -0.042    | 0.028 | 0.14    | NA     | NA    | NA      |
| rs11746310  | 5   | 151391143 | C  | G  | 0.222      | 0.060  | 0.013 | 3.00E-06 | 0.222                                 | 0.004  | 0.004 | 0.42     | 0.008     | 0.011 | 0.48    | 0.011  | 0.021 | 0.61    |
| rs2814982   | 6   | 34546560  | T  | C  | 0.102      | 0.082  | 0.018 | 3.20E-06 | 0.104                                 | 0.009  | 0.006 | 0.12     | -0.008    | 0.015 | 0.57    | -      | 0.027 | 0.11    |
| rs34350244  | 6   | 32561465  | T  | C  | 0.192      | 0.064  | 0.014 | 3.30E-06 | 0.196                                 | 0.002  | 0.005 | 0.68     | -0.002    | 0.013 | 0.90    | -      | 0.024 | 0.43    |
| rs11764780  | 7   | 2020904   | C  | G  | 0.185      | -0.064 | 0.014 | 3.80E-06 | 0.187                                 | 0.001  | 0.005 | 0.90     | -0.030    | 0.012 | 0.01    | -      | 0.022 | 0.004   |
| rs117884048 | 8   | 59546371  | C  | T  | 0.015      | 0.213  | 0.044 | 1.50E-06 | 0.017                                 | -0.026 | 0.014 | 0.07     | 0.008     | 0.030 | 0.79    | -      | 0.054 | 0.61    |
| rs11996942  | 8   | 21674875  | T  | C  | 0.017      | 0.009  | 0.042 | 0.83     | 0.018                                 | -0.063 | 0.014 | 2.90E-06 | 0.060     | 0.043 | 0.16    | NA     | NA    | NA      |
| rs13263652  | 8   | 139346461 | C  | T  | 0.378      | -0.051 | 0.011 | 4.80E-06 | 0.616                                 | 0.005  | 0.004 | 0.18     | -0.001    | 0.009 | 0.88    | 0.008  | 0.018 | 0.65    |
| rs12554874  | 9   | 37073902  | T  | C  | 0.376      | -0.053 | 0.011 | 1.60E-06 | 0.377                                 | 0.004  | 0.004 | 0.24     | -0.006    | 0.009 | 0.50    | -      | 0.018 | 0.27    |

|             |     |           |    |    | EXPOSURES: |        |       |          |                                       |        |       |          | OUTCOMES: |       |         |        |       |         |
|-------------|-----|-----------|----|----|------------|--------|-------|----------|---------------------------------------|--------|-------|----------|-----------|-------|---------|--------|-------|---------|
|             |     |           |    |    | OPIOID USE |        |       |          | ABDOMINAL/ STOMACH PAIN FOR 3+ MONTHS |        |       |          | MDD       |       |         | ASRD   |       |         |
| SNP         | CHR | POS       | EA | OA | eaf        | effect | se    | P-value  | eaf                                   | effect | se    | P-value  | effect    | se    | P-value | effect | se    | P-value |
| rs13302047  | 9   | 81386827  | G  | C  | 0.192      | 0.069  | 0.014 | 3.60E-07 | 0.192                                 | 0.000  | 0.005 | 1.00     | 0.013     | 0.011 | 0.24    | 0.042  | 0.021 | 0.04    |
| rs4837022   | 9   | 128475379 | T  | C  | 0.357      | -0.054 | 0.011 | 1.40E-06 | 0.641                                 | 0.000  | 0.004 | 0.93     | -0.001    | 0.010 | 0.96    | 0.022  | 0.018 | 0.21    |
| rs10159545  | 10  | 21766969  | G  | C  | 0.349      | 0.054  | 0.011 | 2.20E-06 | 0.355                                 | 0.000  | 0.004 | 0.91     | -0.009    | 0.010 | 0.33    | 0.007  | 0.018 | 0.70    |
| rs761777    | 10  | 134938075 | G  | A  | 0.253      | 0.057  | 0.012 | 4.10E-06 | 0.259                                 | 0.005  | 0.004 | 0.20     | 0.029     | 0.012 | 0.02    | 0.055  | 0.022 | 0.01    |
| rs1542724   | 11  | 46117183  | C  | A  | 0.269      | 0.057  | 0.012 | 2.70E-06 | 0.270                                 | 0.003  | 0.004 | 0.47     | 0.013     | 0.010 | 0.19    | 0.012  | 0.019 | 0.53    |
| rs6484804   | 11  | 11337945  | G  | A  | 0.336      | -0.007 | 0.012 | 0.53     | 0.335                                 | 0.019  | 0.004 | 8.70E-07 | 0.007     | 0.010 | 0.50    | 0.015  | 0.020 | 0.46    |
| rs4763505   | 12  | 10477712  | T  | A  | 0.317      | -0.053 | 0.012 | 4.50E-06 | 0.684                                 | -0.002 | 0.004 | 0.65     | -0.011    | 0.010 | 0.29    | 0.037  | 0.020 | 0.06    |
| rs56262049  | 13  | 42644705  | C  | T  | 0.182      | -0.066 | 0.014 | 2.50E-06 | 0.185                                 | 0.007  | 0.005 | 0.13     | -0.011    | 0.012 | 0.35    | 0.026  | 0.022 | 0.25    |
| rs7319102   | 13  | 58252801  | G  | A  | 0.229      | 0.060  | 0.013 | 2.40E-06 | 0.771                                 | 0.002  | 0.004 | 0.72     | 0.012     | 0.011 | 0.28    | 0.051  | 0.020 | 0.01    |
| rs11624521  | 14  | 73760832  | T  | C  | 0.193      | 0.064  | 0.014 | 3.10E-06 | 0.196                                 | 0.013  | 0.004 | 0.005    | -0.009    | 0.011 | 0.40    | 0.020  | 0.022 | 0.37    |
| rs112133463 | 15  | 99120809  | A  | G  | 0.090      | 0.017  | 0.019 | 0.37     | 0.091                                 | 0.028  | 0.006 | 4.50E-06 | -0.005    | 0.016 | 0.77    | 0.010  | 0.031 | 0.76    |
| rs113544339 | 15  | 86576076  | G  | T  | 0.023      | -0.166 | 0.036 | 3.60E-06 | 0.024                                 | -0.024 | 0.012 | 0.05     | -0.047    | 0.031 | 0.13    | 0.067  | 0.061 | 0.27    |
| rs12594013  | 15  | 75596353  | T  | C  | 0.263      | 0.058  | 0.012 | 2.00E-06 | 0.266                                 | -0.002 | 0.004 | 0.60     | -0.009    | 0.011 | 0.41    | 0.002  | 0.020 | 0.93    |
| rs2289739   | 15  | 41801512  | T  | G  | 0.343      | 0.054  | 0.011 | 2.00E-06 | 0.348                                 | 0.003  | 0.004 | 0.49     | 0.009     | 0.010 | 0.36    | 0.010  | 0.018 | 0.59    |
| rs975376    | 16  | 73100503  | C  | G  | 0.164      | 0.071  | 0.015 | 1.00E-06 | 0.168                                 | 0.009  | 0.005 | 0.07     | -0.006    | 0.013 | 0.65    | 0.014  | 0.025 | 0.58    |
| rs9898793   | 17  | 43116313  | T  | C  | 0.261      | 0.056  | 0.012 | 4.20E-06 | 0.265                                 | 0.013  | 0.004 | 0.002    | 0.022     | 0.011 | 0.03    | 0.013  | 0.020 | 0.51    |
| rs7359937   | 19  | 5143693   | C  | G  | 0.063      | 0.016  | 0.022 | 0.46     | 0.065                                 | -0.034 | 0.007 | 3.60E-06 | -0.004    | 0.019 | 0.83    | 0.003  | 0.040 | 0.94    |
| rs2297197   | 20  | 44673546  | G  | C  | 0.281      | 0.060  | 0.012 | 7.70E-07 | 0.290                                 | 0.004  | 0.004 | 0.35     | 0.028     | 0.010 | 0.01    | 0.028  | 0.020 | 0.15    |
| rs6141277   | 20  | 30831157  | C  | G  | 0.392      | 0.052  | 0.011 | 2.20E-06 | 0.392                                 | 0.004  | 0.004 | 0.23     | 0.006     | 0.009 | 0.52    | 0.045  | 0.017 | 0.009   |
| rs73228014  | 21  | 42752754  | A  | G  | 0.024      | 0.161  | 0.035 | 3.80E-06 | 0.024                                 | 0.006  | 0.012 | 0.59     | 0.010     | 0.052 | 0.85    | 0.003  | 0.040 | 0.94    |

<sup>a</sup>For outcome phenotype MDD, summary statistics on MV instruments extracted from PGC GWAS excluding both UK Biobank (N = 29740) and 23andMe cohorts for total N = 143265 (no sample overlap).

|                       |                                                             |
|-----------------------|-------------------------------------------------------------|
| <b>Abbreviations:</b> |                                                             |
| MRC-IEU               | MRC Integrative Epidemiology Unit, University of Bristol UK |
| beta                  | effect estimate                                             |

|         |                                                                |  |
|---------|----------------------------------------------------------------|--|
| se      | standard error of effect estimate                              |  |
| SNP     | single nucleotide polymorphism rsid variant identifier         |  |
| CHR     | chromosome                                                     |  |
| POS     | base pair position                                             |  |
| eaf     | effect allele frequency                                        |  |
| p-value | p value of effect estimate                                     |  |
| MDD     | Major depression/ major depressive disorder: outcome phenotype |  |
| ASRD    | Anxiety and stress-related disorder: outcome phenotype         |  |

**eTable 11. Multivariable Instruments for Prescription Opioid Use and Neck/ Shoulder Pain for 3+ Months in UKB Participants on MDD and ASRD: Harmonized Data<sup>a</sup>**

|             |     |           |    |    | EXPOSURES: |        |       |          |                                   |        |       |          | OUTCOMES: |       |         |        |       |         |       |
|-------------|-----|-----------|----|----|------------|--------|-------|----------|-----------------------------------|--------|-------|----------|-----------|-------|---------|--------|-------|---------|-------|
|             |     |           |    |    | OPIOID USE |        |       |          | NECK/ SHOULDER PAIN FOR 3+ MONTHS |        |       |          | MDD       |       |         | ASRD   |       |         |       |
| SNP         | CHR | POS       | EA | OA | eaf        | effect | se    | P-value  | eaf                               | effect | se    | P-value  | effect    | se    | P-value | effect | se    | P-value |       |
| rs127204    | 1   | 112277693 | C  | A  | 0.400      | 0.059  | 0.011 | 8.50E-08 | 0.403                             | 0.002  | 0.002 | 0.40     | 0.008     | 0.009 | 0.41    | 0.010  | 0.018 | 0.58    |       |
| rs1391377   | 1   | 31053082  | C  | T  | 0.175      | 0.009  | 0.014 | 0.53     | 0.176                             | 0.012  | 0.003 | 4.90E-06 | -0.009    | 0.012 | 0.45    | -      | 0.013 | 0.022   | 0.56  |
| rs138405014 | 2   | 221947203 | A  | G  | 0.013      | -0.218 | 0.048 | 4.60E-06 | 0.014                             | -0.005 | 0.009 | 0.60     | 0.028     | 0.052 | 0.59    | 0.211  | 0.079 | 0.008   |       |
| rs139152977 | 2   | 199098906 | A  | T  | 0.025      | 0.164  | 0.034 | 1.90E-06 | 0.027                             | 0.010  | 0.006 | 0.10     | 0.010     | 0.030 | 0.74    | 0.044  | 0.056 | 0.43    |       |
| rs2715933   | 2   | 160877502 | C  | T  | 0.204      | -0.008 | 0.013 | 0.57     | 0.793                             | 0.012  | 0.002 | 1.50E-06 | 0.005     | 0.011 | 0.65    | -      | 0.019 | 0.023   | 0.39  |
| rs13086611  | 3   | 49385417  | T  | A  | 0.303      | -0.054 | 0.012 | 3.30E-06 | 0.302                             | 0.000  | 0.002 | 0.92     | -0.022    | 0.010 | 0.04    | 0.002  | 0.019 | 0.91    |       |
| rs140729888 | 3   | 10521537  | C  | T  | 0.015      | -0.205 | 0.045 | 4.30E-06 | 0.015                             | -0.002 | 0.008 | 0.84     | -0.087    | 0.036 | 0.01    | 0.006  | 0.059 | 0.92    |       |
| rs17270102  | 3   | 122404806 | G  | A  | 0.075      | 0.000  | 0.020 | 0.99     | 0.076                             | -0.019 | 0.004 | 9.00E-07 | -0.017    | 0.018 | 0.34    | -      | 0.058 | 0.036   | 0.10  |
| rs247975    | 3   | 173107443 | T  | C  | 0.467      | -0.050 | 0.011 | 3.80E-06 | 0.534                             | 0.000  | 0.002 | 0.90     | -0.006    | 0.009 | 0.53    | -      | 0.001 | 0.017   | 0.97  |
| rs7631941   | 3   | 80480052  | T  | C  | 0.131      | 0.073  | 0.016 | 4.90E-06 | 0.132                             | 0.005  | 0.003 | 0.08     | -0.016    | 0.014 | 0.24    | 0.008  | 0.027 | 0.77    |       |
| rs13107325  | 4   | 103188709 | T  | C  | 0.074      | 0.100  | 0.020 | 1.10E-06 | 0.078                             | 0.006  | 0.004 | 0.11     | -0.027    | 0.020 | 0.17    | -      | 0.013 | 0.041   | 0.75  |
| rs16874363  | 4   | 23931209  | G  | T  | 0.276      | -0.020 | 0.012 | 0.10     | 0.278                             | 0.011  | 0.002 | 2.20E-06 | 0.002     | 0.010 | 0.85    | -      | 0.014 | 0.020   | 0.47  |
| rs76034781  | 4   | 3272782   | A  | G  | 0.077      | 0.098  | 0.020 | 1.20E-06 | 0.078                             | 0.001  | 0.004 | 0.73     | 0.038     | 0.021 | 0.07    | NA     | NA    | NA      |       |
| rs769657    | 4   | 140877659 | G  | A  | 0.330      | -0.053 | 0.011 | 4.80E-06 | 0.328                             | 0.002  | 0.002 | 0.40     | -0.021    | 0.010 | 0.03    | -      | 0.030 | 0.019   | 0.11  |
| rs11746310  | 5   | 151391143 | C  | G  | 0.222      | 0.060  | 0.013 | 3.00E-06 | 0.223                             | 0.002  | 0.002 | 0.46     | 0.008     | 0.011 | 0.48    | 0.011  | 0.021 | 0.61    |       |
| rs77608563  | 5   | 157581578 | G  | A  | 0.054      | 0.004  | 0.024 | 0.88     | 0.055                             | 0.021  | 0.004 | 2.70E-06 | -0.018    | 0.027 | 0.50    | -      | 0.053 | 0.056   | 0.34  |
| rs2814982   | 6   | 34546560  | T  | C  | 0.102      | 0.082  | 0.018 | 3.20E-06 | 0.103                             | 0.002  | 0.003 | 0.65     | -0.008    | 0.015 | 0.57    | -      | 0.042 | 0.027   | 0.11  |
| rs34350244  | 6   | 32561465  | T  | C  | 0.192      | 0.064  | 0.014 | 3.30E-06 | 0.196                             | 0.004  | 0.003 | 0.14     | -0.002    | 0.013 | 0.90    | -      | 0.019 | 0.024   | 0.43  |
| rs11764780  | 7   | 2020904   | C  | G  | 0.185      | -0.064 | 0.014 | 3.80E-06 | 0.184                             | -0.001 | 0.003 | 0.60     | -0.030    | 0.012 | 0.01    | -      | 0.063 | 0.022   | 0.004 |
| rs117710046 | 8   | 59430010  | T  | C  | 0.016      | 0.210  | 0.043 | 1.20E-06 | 0.016                             | 0.003  | 0.008 | 0.70     | 0.008     | 0.031 | 0.80    | -      | 0.024 | 0.056   | 0.68  |
| rs13263652  | 8   | 139346461 | C  | T  | 0.378      | -0.051 | 0.011 | 4.80E-06 | 0.618                             | -0.001 | 0.002 | 0.79     | -0.001    | 0.009 | 0.88    | 0.008  | 0.018 | 0.65    |       |



|             |     |           |    |    | EXPOSURES: |        |       |          |                                   |        |       |          | OUTCOMES: |       |         |        |       |         |
|-------------|-----|-----------|----|----|------------|--------|-------|----------|-----------------------------------|--------|-------|----------|-----------|-------|---------|--------|-------|---------|
|             |     |           |    |    | OPIOID USE |        |       |          | NECK/ SHOULDER PAIN FOR 3+ MONTHS |        |       |          | MDD       |       |         | ASRD   |       |         |
| SNP         | CHR | POS       | EA | OA | eaf        | effect | se    | P-value  | eaf                               | effect | se    | P-value  | effect    | se    | P-value | effect | se    | P-value |
| rs4840542   | 8   | 10944809  | G  | T  | 0.497      | 0.026  | 0.011 | 0.02     | 0.506                             | 0.009  | 0.002 | 4.10E-06 | 0.000     | 0.009 | 0.98    | 0.044  | 0.017 | 0.01    |
| rs111285820 | 9   | 27991498  | T  | C  | 0.026      | -0.099 | 0.034 | 0.003    | 0.030                             | -0.028 | 0.006 | 4.20E-06 | 0.025     | 0.027 | 0.37    | -0.078 | 0.054 | 0.15    |
| rs12554874  | 9   | 37073902  | T  | C  | 0.376      | -0.053 | 0.011 | 1.60E-06 | 0.375                             | 0.002  | 0.002 | 0.42     | -0.006    | 0.009 | 0.50    | -0.020 | 0.018 | 0.27    |
| rs12685059  | 9   | 77549830  | C  | A  | 0.017      | -0.024 | 0.041 | 0.57     | 0.020                             | 0.037  | 0.007 | 6.20E-07 | -0.003    | 0.033 | 0.92    | 0.148  | 0.069 | 0.03    |
| rs13302047  | 9   | 81386827  | G  | C  | 0.192      | 0.069  | 0.014 | 3.60E-07 | 0.189                             | 0.003  | 0.003 | 0.20     | 0.013     | 0.011 | 0.24    | 0.042  | 0.021 | 0.04    |
| rs4837022   | 9   | 128475379 | T  | C  | 0.357      | -0.054 | 0.011 | 1.40E-06 | 0.642                             | 0.000  | 0.002 | 0.86     | -0.001    | 0.010 | 0.96    | 0.022  | 0.018 | 0.21    |
| rs10159545  | 10  | 21766969  | G  | C  | 0.349      | 0.054  | 0.011 | 2.20E-06 | 0.352                             | 0.002  | 0.002 | 0.25     | -0.009    | 0.010 | 0.33    | 0.007  | 0.018 | 0.70    |
| rs117686932 | 10  | 5436486   | T  | C  | 0.018      | 0.051  | 0.041 | 0.22     | 0.024                             | 0.032  | 0.007 | 3.50E-06 | -0.027    | 0.037 | 0.46    | NA     | NA    | NA      |
| rs761777    | 10  | 134938075 | G  | A  | 0.253      | 0.057  | 0.012 | 4.10E-06 | 0.256                             | 0.001  | 0.002 | 0.57     | 0.029     | 0.012 | 0.02    | 0.055  | 0.022 | 0.01    |
| rs1542724   | 11  | 46117183  | C  | A  | 0.269      | 0.057  | 0.012 | 2.70E-06 | 0.269                             | 0.002  | 0.002 | 0.48     | 0.013     | 0.010 | 0.19    | 0.012  | 0.019 | 0.53    |
| rs4763505   | 12  | 10477712  | T  | A  | 0.317      | -0.053 | 0.012 | 4.50E-06 | 0.682                             | -0.003 | 0.002 | 0.16     | -0.011    | 0.010 | 0.29    | 0.037  | 0.020 | 0.06    |
| rs56262049  | 13  | 42644705  | C  | T  | 0.182      | -0.066 | 0.014 | 2.50E-06 | 0.187                             | 0.002  | 0.003 | 0.42     | -0.011    | 0.012 | 0.35    | 0.026  | 0.022 | 0.25    |
| rs7319102   | 13  | 58252801  | G  | A  | 0.229      | 0.060  | 0.013 | 2.40E-06 | 0.773                             | 0.000  | 0.002 | 0.94     | 0.012     | 0.011 | 0.28    | 0.051  | 0.020 | 0.01    |
| rs11624521  | 14  | 73760832  | T  | C  | 0.193      | 0.064  | 0.014 | 3.10E-06 | 0.197                             | 0.007  | 0.003 | 0.005    | -0.009    | 0.011 | 0.40    | 0.020  | 0.022 | 0.37    |
| rs113544339 | 15  | 86576076  | G  | T  | 0.023      | -0.166 | 0.036 | 3.60E-06 | 0.024                             | 0.003  | 0.007 | 0.65     | -0.047    | 0.031 | 0.13    | 0.067  | 0.061 | 0.27    |
| rs12594013  | 15  | 75596353  | T  | C  | 0.263      | 0.058  | 0.012 | 2.00E-06 | 0.266                             | 0.001  | 0.002 | 0.74     | -0.009    | 0.011 | 0.41    | 0.002  | 0.020 | 0.93    |
| rs2289739   | 15  | 41801512  | T  | G  | 0.343      | 0.054  | 0.011 | 2.00E-06 | 0.347                             | -0.001 | 0.002 | 0.51     | 0.009     | 0.010 | 0.36    | 0.010  | 0.018 | 0.59    |
| rs112512634 | 16  | 69532492  | T  | C  | 0.086      | 0.028  | 0.019 | 0.15     | 0.086                             | 0.016  | 0.004 | 4.40E-06 | 0.002     | 0.020 | 0.91    | NA     | NA    | NA      |
| rs975376    | 16  | 73100503  | C  | G  | 0.164      | 0.071  | 0.015 | 1.00E-06 | 0.168                             | -0.003 | 0.003 | 0.30     | -0.006    | 0.013 | 0.65    | 0.014  | 0.025 | 0.58    |
| rs9898793   | 17  | 43116313  | T  | C  | 0.261      | 0.056  | 0.012 | 4.20E-06 | 0.261                             | 0.002  | 0.002 | 0.29     | 0.022     | 0.011 | 0.03    | 0.013  | 0.020 | 0.51    |
| rs2297197   | 20  | 44673546  | G  | C  | 0.281      | 0.060  | 0.012 | 7.70E-07 | 0.287                             | 0.003  | 0.002 | 0.17     | 0.028     | 0.010 | 0.006   | 0.028  | 0.020 | 0.15    |
| rs6141277   | 20  | 30831157  | C  | G  | 0.392      | 0.052  | 0.011 | 2.20E-06 | 0.393                             | 0.002  | 0.002 | 0.28     | 0.006     | 0.009 | 0.52    | 0.045  | 0.017 | 0.009   |
| rs232477    | 21  | 22699418  | T  | C  | 0.057      | -0.009 | 0.023 | 0.69     | 0.059                             | -0.020 | 0.004 | 4.30E-06 | 0.012     | 0.020 | 0.55    | 0.041  | 0.041 | 0.31    |
| rs73228014  | 21  | 42752754  | A  | G  | 0.024      | 0.161  | 0.035 | 3.80E-06 | 0.024                             | 0.010  | 0.007 | 0.15     | 0.010     | 0.052 | 0.85    | 0.096  | 0.031 | 0.002   |

|          |     |          |    |    | EXPOSURES: |        |       |         |                                   |        |       |          | OUTCOMES: |       |         |        |       |         |
|----------|-----|----------|----|----|------------|--------|-------|---------|-----------------------------------|--------|-------|----------|-----------|-------|---------|--------|-------|---------|
|          |     |          |    |    | OPIOID USE |        |       |         | NECK/ SHOULDER PAIN FOR 3+ MONTHS |        |       |          | MDD       |       |         | ASRD   |       |         |
| SNP      | CHR | POS      | EA | OA | eaf        | effect | se    | P-value | eaf                               | effect | se    | P-value  | effect    | se    | P-value | effect | se    | P-value |
| rs855793 | 22  | 37449608 | T  | C  | 0.137      | 0.006  | 0.016 | 0.70    | 0.862                             | -0.013 | 0.003 | 4.50E-06 | 0.028     | 0.014 | 0.05    | 0.017  | 0.028 | 0.54    |
|          |     |          |    |    |            |        |       |         |                                   |        |       |          |           |       |         |        |       |         |

<sup>a</sup> For outcome phenotype MDD, summary statistics on MV instruments extracted from PGC GWAS excluding both UK Biobank (N = 29740) and 23andMe cohorts for total N = 143265 (no sample overlap).

|                       |                                                                |
|-----------------------|----------------------------------------------------------------|
| <b>Abbreviations:</b> |                                                                |
| MRC-IEU               | MRC Integrative Epidemiology Unit, University of Bristol UK    |
| beta                  | effect estimate                                                |
| se                    | standard error of effect estimate                              |
| SNP                   | single nucleotide polymorphism rsid variant identifier         |
| CHR                   | chromosome                                                     |
| POS                   | base pair position                                             |
| eaf                   | effect allele frequency                                        |
| p-value               | p value of effect estimate                                     |
| MDD                   | Major depression/ major depressive disorder: outcome phenotype |
| ASRD                  | Anxiety and stress-related disorder: outcome phenotype         |

**eTable 12. Multivariable Instruments for Prescription Opioid Use and Pain for 3+ Months in UKB Participants on MDD and ASRD: Harmonized Data<sup>a</sup>**

|             |     |           |    |    | EXPOSURES: |        |       |          |                         |        |       |          | OUTCOMES: |       |         |        |       |         |
|-------------|-----|-----------|----|----|------------|--------|-------|----------|-------------------------|--------|-------|----------|-----------|-------|---------|--------|-------|---------|
|             |     |           |    |    | OPIOID USE |        |       |          | BACK PAIN FOR 3+ MONTHS |        |       |          | MDD       |       |         | ASRD   |       |         |
| SNP         | CHR | POS       | EA | OA | eaf        | effect | se    | P-value  | eaf                     | effect | se    | P-value  | effect    | se    | P-value | effect | se    | P-value |
| rs127204    | 1   | 112277693 | C  | A  | 0.400      | 0.059  | 0.011 | 8.50E-08 | 0.404                   | 0.004  | 0.002 | 0.05     | 0.008     | 0.009 | 0.41    | 0.010  | 0.018 | 0.58    |
| rs142015271 | 1   | 61346309  | G  | C  | 0.011      | -0.049 | 0.053 | 0.35     | 0.014                   | 0.039  | 0.008 | 3.40E-06 | 0.054     | 0.047 | 0.25    | 0.008  | 0.089 | 0.93    |
| rs633297    | 1   | 41985453  | A  | C  | 0.473      | 0.009  | 0.011 | 0.42     | 0.474                   | 0.009  | 0.002 | 4.20E-06 | 0.010     | 0.009 | 0.28    | 0.009  | 0.018 | 0.63    |
| rs72746941  | 1   | 225085775 | A  | G  | 0.056      | 0.004  | 0.023 | 0.88     | 0.057                   | 0.021  | 0.004 | 5.00E-07 | 0.036     | 0.025 | 0.14    | NA     | NA    | NA      |
| rs80140055  | 1   | 190277915 | C  | T  | 0.030      | 0.047  | 0.032 | 0.14     | 0.032                   | 0.027  | 0.006 | 1.50E-06 | 0.029     | 0.029 | 0.32    | NA     | NA    | NA      |
| rs945211    | 1   | 32191798  | G  | C  | 0.383      | -0.051 | 0.011 | 3.20E-06 | 0.617                   | -0.001 | 0.002 | 0.48     | -0.010    | 0.010 | 0.30    | 0.000  | 0.019 | 0.99    |
| rs138405014 | 2   | 221947203 | A  | G  | 0.013      | -0.218 | 0.048 | 4.60E-06 | 0.014                   | 0.005  | 0.008 | 0.54     | 0.028     | 0.052 | 0.59    | 0.211  | 0.079 | 0.008   |
| rs139152977 | 2   | 199098906 | A  | T  | 0.025      | 0.164  | 0.034 | 1.90E-06 | 0.027                   | 0.002  | 0.006 | 0.72     | 0.010     | 0.030 | 0.74    | 0.044  | 0.056 | 0.43    |
| rs72961848  | 2   | 118482463 | T  | C  | 0.144      | -0.041 | 0.015 | 0.007    | 0.144                   | -0.013 | 0.003 | 4.10E-06 | 0.007     | 0.013 | 0.58    | 0.000  | 0.024 | 0.99    |
| rs13086611  | 3   | 49385417  | T  | A  | 0.303      | -0.054 | 0.012 | 3.30E-06 | 0.302                   | -0.006 | 0.002 | 0.005    | -0.022    | 0.010 | 0.04    | 0.002  | 0.019 | 0.91    |
| rs140729888 | 3   | 10521537  | C  | T  | 0.015      | -0.205 | 0.045 | 4.30E-06 | 0.015                   | -0.012 | 0.008 | 0.13     | -0.087    | 0.036 | 0.01    | 0.006  | 0.059 | 0.92    |
| rs247975    | 3   | 173107443 | T  | C  | 0.467      | -0.050 | 0.011 | 3.80E-06 | 0.534                   | -0.002 | 0.002 | 0.20     | -0.006    | 0.009 | 0.53    | 0.001  | 0.017 | 0.97    |
| rs7631941   | 3   | 80480052  | T  | C  | 0.131      | 0.073  | 0.016 | 4.90E-06 | 0.132                   | 0.006  | 0.003 | 0.04     | -0.016    | 0.014 | 0.24    | 0.008  | 0.027 | 0.77    |
| rs13107325  | 4   | 103188709 | T  | C  | 0.074      | 0.100  | 0.020 | 1.10E-06 | 0.077                   | 0.010  | 0.004 | 0.006    | -0.027    | 0.020 | 0.17    | 0.013  | 0.041 | 0.75    |
| rs144117099 | 4   | 129240996 | A  | G  | 0.018      | -0.012 | 0.040 | 0.76     | 0.018                   | 0.036  | 0.007 | 5.40E-07 | 0.001     | 0.043 | 0.98    | 0.015  | 0.074 | 0.84    |
| rs76034781  | 4   | 3272782   | A  | G  | 0.077      | 0.098  | 0.020 | 1.20E-06 | 0.078                   | 0.007  | 0.004 | 0.05     | 0.038     | 0.021 | 0.07    | 0.096  | 0.031 | 0.002   |
| rs769657    | 4   | 140877659 | G  | A  | 0.330      | -0.053 | 0.011 | 4.80E-06 | 0.328                   | -0.002 | 0.002 | 0.22     | -0.021    | 0.010 | 0.03    | 0.030  | 0.019 | 0.11    |
| rs11746310  | 5   | 151391143 | C  | G  | 0.222      | 0.060  | 0.013 | 3.00E-06 | 0.223                   | 0.001  | 0.002 | 0.71     | 0.008     | 0.011 | 0.48    | 0.011  | 0.021 | 0.61    |
| rs2814982   | 6   | 34546560  | T  | C  | 0.102      | 0.082  | 0.018 | 3.20E-06 | 0.105                   | 0.003  | 0.003 | 0.41     | -0.008    | 0.015 | 0.57    | 0.042  | 0.027 | 0.11    |
| rs34350244  | 6   | 32561465  | T  | C  | 0.192      | 0.064  | 0.014 | 3.30E-06 | 0.194                   | -0.002 | 0.002 | 0.35     | -0.002    | 0.013 | 0.90    | 0.019  | 0.024 | 0.43    |
| rs11764780  | 7   | 2020904   | C  | G  | 0.185      | -0.064 | 0.014 | 3.80E-06 | 0.184                   | -0.002 | 0.002 | 0.54     | -0.030    | 0.012 | 0.01    | 0.063  | 0.022 | 0.004   |

|             |     |           |    |    | EXPOSURES: |        |       |          |                         |        |       |          | OUTCOMES: |       |         |        |       |         |
|-------------|-----|-----------|----|----|------------|--------|-------|----------|-------------------------|--------|-------|----------|-----------|-------|---------|--------|-------|---------|
|             |     |           |    |    | OPIOID USE |        |       |          | BACK PAIN FOR 3+ MONTHS |        |       |          | MDD       |       |         | ASRD   |       |         |
| SNP         | CHR | POS       | EA | OA | eaf        | effect | se    | P-value  | eaf                     | effect | se    | P-value  | effect    | se    | P-value | effect | se    | P-value |
| rs10112515  | 8   | 121062335 | C  | T  | 0.015      | 0.005  | 0.045 | 0.92     | 0.015                   | -0.036 | 0.008 | 3.60E-06 | 0.029     | 0.036 | 0.42    | 0.088  | 0.080 | 0.27    |
| rs117710046 | 8   | 59430010  | T  | C  | 0.016      | 0.210  | 0.043 | 1.20E-06 | 0.016                   | -0.002 | 0.008 | 0.83     | 0.008     | 0.031 | 0.80    | 0.024  | 0.056 | 0.68    |
| rs13263652  | 8   | 139346461 | C  | T  | 0.378      | -0.051 | 0.011 | 4.80E-06 | 0.619                   | 0.000  | 0.002 | 0.83     | -0.001    | 0.009 | 0.88    | 0.008  | 0.018 | 0.65    |
| rs79700578  | 8   | 119859562 | C  | T  | 0.041      | -0.009 | 0.027 | 0.75     | 0.044                   | 0.023  | 0.005 | 2.20E-06 | -0.005    | 0.023 | 0.83    | 0.012  | 0.042 | 0.77    |
| rs12554874  | 9   | 37073902  | T  | C  | 0.376      | -0.053 | 0.011 | 1.60E-06 | 0.377                   | 0.003  | 0.002 | 0.09     | -0.006    | 0.009 | 0.50    | 0.020  | 0.018 | 0.27    |
| rs13302047  | 9   | 81386827  | G  | C  | 0.192      | 0.069  | 0.014 | 3.60E-07 | 0.190                   | -0.002 | 0.002 | 0.48     | 0.013     | 0.011 | 0.24    | 0.042  | 0.021 | 0.04    |
| rs4837022   | 9   | 128475379 | T  | C  | 0.357      | -0.054 | 0.011 | 1.40E-06 | 0.642                   | 0.000  | 0.002 | 0.97     | -0.001    | 0.010 | 0.96    | 0.022  | 0.018 | 0.21    |
| rs79657771  | 9   | 110608572 | G  | A  | 0.024      | -0.068 | 0.035 | 5.20E-02 | 0.026                   | -0.028 | 0.006 | 3.80E-06 | -0.020    | 0.029 | 0.49    | 0.123  | 0.057 | 0.03    |
| rs10159545  | 10  | 21766969  | G  | C  | 0.349      | 0.054  | 0.011 | 2.20E-06 | 0.353                   | 0.004  | 0.002 | 0.03     | -0.009    | 0.010 | 0.33    | 0.007  | 0.018 | 0.70    |
| rs761777    | 10  | 134938075 | G  | A  | 0.253      | 0.057  | 0.012 | 4.10E-06 | 0.257                   | 0.004  | 0.002 | 0.09     | 0.029     | 0.012 | 0.02    | 0.055  | 0.022 | 0.01    |
| rs1542724   | 11  | 46117183  | C  | A  | 0.269      | 0.057  | 0.012 | 2.70E-06 | 0.270                   | 0.002  | 0.002 | 0.37     | 0.013     | 0.010 | 0.19    | 0.012  | 0.019 | 0.53    |
| rs524968    | 11  | 117368805 | A  | G  | 0.335      | 0.008  | 0.011 | 0.48     | 0.663                   | 0.010  | 0.002 | 1.20E-06 | -0.012    | 0.010 | 0.24    | 0.019  | 0.018 | 0.30    |
| rs4763505   | 12  | 10477712  | T  | A  | 0.317      | -0.053 | 0.012 | 4.50E-06 | 0.683                   | 0.001  | 0.002 | 0.52     | -0.011    | 0.010 | 0.29    | 0.037  | 0.020 | 0.06    |
| rs56262049  | 13  | 42644705  | C  | T  | 0.182      | -0.066 | 0.014 | 2.50E-06 | 0.185                   | 0.000  | 0.002 | 0.84     | -0.011    | 0.012 | 0.35    | 0.026  | 0.022 | 0.25    |
| rs7319102   | 13  | 58252801  | G  | A  | 0.229      | 0.060  | 0.013 | 2.40E-06 | 0.773                   | 0.001  | 0.002 | 0.66     | 0.012     | 0.011 | 0.28    | 0.051  | 0.020 | 0.01    |
| rs11624521  | 14  | 73760832  | T  | C  | 0.193      | 0.064  | 0.014 | 3.10E-06 | 0.197                   | 0.006  | 0.002 | 0.01     | -0.009    | 0.011 | 0.40    | 0.020  | 0.022 | 0.37    |
| rs113544339 | 15  | 86576076  | G  | T  | 0.023      | -0.166 | 0.036 | 3.60E-06 | 0.024                   | -0.010 | 0.006 | 0.12     | -0.047    | 0.031 | 0.13    | 0.067  | 0.061 | 0.27    |
| rs12442154  | 15  | 67241569  | G  | A  | 0.234      | 0.029  | 0.013 | 0.03     | 0.236                   | -0.010 | 0.002 | 3.90E-06 | -0.010    | 0.011 | 0.36    | 0.012  | 0.022 | 0.59    |
| rs12594013  | 15  | 75596353  | T  | C  | 0.263      | 0.058  | 0.012 | 2.00E-06 | 0.266                   | 0.002  | 0.002 | 0.32     | -0.009    | 0.011 | 0.41    | 0.002  | 0.020 | 0.93    |
| rs2289739   | 15  | 41801512  | T  | G  | 0.343      | 0.054  | 0.011 | 2.00E-06 | 0.347                   | -0.001 | 0.002 | 0.78     | 0.009     | 0.010 | 0.36    | 0.010  | 0.018 | 0.59    |
| rs975376    | 16  | 73100503  | C  | G  | 0.164      | 0.071  | 0.015 | 1.00E-06 | 0.167                   | 0.003  | 0.003 | 0.30     | -0.006    | 0.013 | 0.65    | 0.014  | 0.025 | 0.58    |
| rs9898793   | 17  | 43116313  | T  | C  | 0.261      | 0.056  | 0.012 | 4.20E-06 | 0.262                   | 0.003  | 0.002 | 0.15     | 0.022     | 0.011 | 0.03    | 0.013  | 0.020 | 0.51    |
| rs78328176  | 18  | 75009972  | A  | T  | 0.051      | -0.027 | 0.025 | 0.27     | 0.058                   | -0.020 | 0.004 | 1.70E-06 | 0.009     | 0.024 | 0.71    | NA     | NA    | NA      |
| rs2297197   | 20  | 44673546  | G  | C  | 0.281      | 0.060  | 0.012 | 7.70E-07 | 0.288                   | -0.001 | 0.002 | 0.59     | 0.028     | 0.010 | 0.006   | 0.028  | 0.020 | 0.15    |

|            |     |          |    |    | EXPOSURES: |        |       |          |                         |        |       |         | OUTCOMES: |       |         |        |       |         |
|------------|-----|----------|----|----|------------|--------|-------|----------|-------------------------|--------|-------|---------|-----------|-------|---------|--------|-------|---------|
|            |     |          |    |    | OPIOID USE |        |       |          | BACK PAIN FOR 3+ MONTHS |        |       |         | MDD       |       |         | ASRD   |       |         |
| SNP        | CHR | POS      | EA | OA | eaf        | effect | se    | P-value  | eaf                     | effect | se    | P-value | effect    | se    | P-value | effect | se    | P-value |
| rs6141277  | 20  | 30831157 | C  | G  | 0.392      | 0.052  | 0.011 | 2.20E-06 | 0.392                   | 0.006  | 0.002 | 0.002   | 0.006     | 0.009 | 0.52    | 0.045  | 0.017 | 0.009   |
| rs73228014 | 21  | 42752754 | A  | G  | 0.024      | 0.161  | 0.035 | 3.80E-06 | 0.024                   | -0.002 | 0.006 | 0.73    | 0.010     | 0.052 | 0.85    | NA     | NA    | NA      |
|            |     |          |    |    |            |        |       |          |                         |        |       |         |           |       |         |        |       |         |

<sup>a</sup> For outcome phenotype MDD, summary statistics on MV instruments extracted from PGC GWAS excluding both UK Biobank (N = 29740) and 23andMe cohorts for total N = 143265 (no sample overlap).

| <b>Abbreviations:</b> |                                                                |
|-----------------------|----------------------------------------------------------------|
| MRC-IEU               | MRC Integrative Epidemiology Unit, University of Bristol UK    |
| beta                  | effect estimate                                                |
| se                    | standard error of effect estimate                              |
| SNP                   | single nucleotide polymorphism rsid variant identifier         |
| CHR                   | chromosome                                                     |
| POS                   | base pair position                                             |
| eaf                   | effect allele frequency                                        |
| p-value               | p value of effect estimate                                     |
| MDD                   | Major depression/ major depressive disorder: outcome phenotype |
| ASRD                  | Anxiety and stress-related disorder: outcome phenotype         |

**eTable 13. Multivariable Instruments for Prescription Opioid Use and Knee Pain for 3+ Months in UKB Participants on MDD and ASRD: Harmonized Data<sup>a</sup>**

|             |     |           |    |    | EXPOSURES: |        |       |          |                          |        |       |          | OUTCOMES: |       |         |        |       |         |
|-------------|-----|-----------|----|----|------------|--------|-------|----------|--------------------------|--------|-------|----------|-----------|-------|---------|--------|-------|---------|
|             |     |           |    |    | OPIOID USE |        |       |          | KNEE PAIN FOR 3 + MONTHS |        |       |          | MDD       |       |         | ASRD   |       |         |
| SNP         | CHR | POS       | EA | OA | eaf        | effect | se    | P-value  | eaf                      | effect | se    | P-value  | effect    | se    | P-value | effect | se    | P-value |
| rs127204    | 1   | 112277693 | C  | A  | 0.400      | 0.059  | 0.011 | 8.50E-08 | 0.403                    | 0.000  | 0.002 | 0.81     | 0.008     | 0.009 | 0.41    | 0.010  | 0.018 | 0.58    |
| rs945211    | 1   | 32191798  | G  | C  | 0.383      | -0.051 | 0.011 | 3.20E-06 | 0.617                    | 0.000  | 0.002 | 0.81     | -0.010    | 0.010 | 0.30    | 0.000  | 0.019 | 0.99    |
| rs11886592  | 2   | 114010048 | T  | C  | 0.022      | 0.009  | 0.037 | 0.81     | 0.024                    | -0.028 | 0.006 | 3.70E-06 | 0.036     | 0.029 | 0.21    | 0.001  | 0.063 | 0.99    |
| rs138405014 | 2   | 221947203 | A  | G  | 0.013      | -0.218 | 0.048 | 4.60E-06 | 0.014                    | -0.003 | 0.008 | 0.72     | 0.028     | 0.052 | 0.59    | 0.211  | 0.079 | 0.008   |
| rs139152977 | 2   | 199098906 | A  | T  | 0.025      | 0.164  | 0.034 | 1.90E-06 | 0.027                    | 0.002  | 0.006 | 0.78     | 0.010     | 0.030 | 0.74    | 0.044  | 0.056 | 0.43    |
| rs67230931  | 2   | 57714037  | G  | A  | 0.309      | 0.019  | 0.012 | 0.10     | 0.310                    | 0.010  | 0.002 | 1.50E-06 | -0.021    | 0.010 | 0.03    | 0.006  | 0.018 | 0.74    |
| rs13086611  | 3   | 49385417  | T  | A  | 0.303      | -0.054 | 0.012 | 3.30E-06 | 0.302                    | -0.001 | 0.002 | 0.63     | -0.022    | 0.010 | 0.04    | 0.002  | 0.019 | 0.91    |
| rs140729888 | 3   | 10521537  | C  | T  | 0.015      | -0.205 | 0.045 | 4.30E-06 | 0.015                    | -0.002 | 0.008 | 0.76     | -0.087    | 0.036 | 0.01    | 0.006  | 0.059 | 0.92    |
| rs247975    | 3   | 173107443 | T  | C  | 0.467      | -0.050 | 0.011 | 3.80E-06 | 0.536                    | -0.004 | 0.002 | 0.06     | -0.006    | 0.009 | 0.53    | 0.001  | 0.017 | 0.97    |
| rs7631941   | 3   | 80480052  | T  | C  | 0.131      | 0.073  | 0.016 | 4.90E-06 | 0.133                    | 0.004  | 0.003 | 0.13     | -0.016    | 0.014 | 0.24    | 0.008  | 0.027 | 0.77    |
| rs13107325  | 4   | 103188709 | T  | C  | 0.074      | 0.100  | 0.020 | 1.10E-06 | 0.078                    | 0.004  | 0.003 | 0.29     | -0.027    | 0.020 | 0.17    | 0.013  | 0.041 | 0.75    |
| rs75984500  | 4   | 15671383  | T  | C  | 0.064      | 0.031  | 0.022 | 0.16     | 0.070                    | 0.017  | 0.004 | 3.80E-06 | 0.020     | 0.019 | 0.30    | 0.090  | 0.037 | 0.01    |
| rs76034781  | 4   | 3272782   | A  | G  | 0.077      | 0.098  | 0.020 | 1.20E-06 | 0.079                    | 0.000  | 0.003 | 0.94     | 0.038     | 0.021 | 0.07    | 0.096  | 0.031 | 0.002   |
| rs769657    | 4   | 140877659 | G  | A  | 0.330      | -0.053 | 0.011 | 4.80E-06 | 0.328                    | -0.004 | 0.002 | 0.06     | -0.021    | 0.010 | 0.03    | 0.030  | 0.019 | 0.11    |
| rs11746310  | 5   | 151391143 | C  | G  | 0.222      | 0.060  | 0.013 | 3.00E-06 | 0.223                    | -0.001 | 0.002 | 0.78     | 0.008     | 0.011 | 0.48    | 0.011  | 0.021 | 0.61    |
| rs2814982   | 6   | 34546560  | T  | C  | 0.102      | 0.082  | 0.018 | 3.20E-06 | 0.104                    | 0.003  | 0.003 | 0.35     | -0.008    | 0.015 | 0.57    | 0.042  | 0.027 | 0.11    |
| rs34350244  | 6   | 32561465  | T  | C  | 0.192      | 0.064  | 0.014 | 3.30E-06 | 0.196                    | 0.002  | 0.002 | 0.36     | -0.002    | 0.013 | 0.90    | 0.019  | 0.024 | 0.43    |
| rs10230736  | 7   | 150496104 | A  | G  | 0.198      | 0.003  | 0.014 | 0.82     | 0.202                    | -0.011 | 0.002 | 4.70E-06 | 0.001     | 0.012 | 0.92    | 0.011  | 0.022 | 0.62    |
| rs116893232 | 7   | 113665542 | T  | C  | 0.019      | -0.029 | 0.039 | 0.47     | 0.019                    | 0.032  | 0.007 | 2.30E-06 | -0.006    | 0.042 | 0.89    | 0.089  | 0.084 | 0.29    |
| rs11764780  | 7   | 2020904   | C  | G  | 0.185      | -0.064 | 0.014 | 3.80E-06 | 0.185                    | -0.005 | 0.002 | 0.03     | -0.030    | 0.012 | 0.01    | 0.063  | 0.022 | 0.004   |
| rs117710046 | 8   | 59430010  | T  | C  | 0.016      | 0.210  | 0.043 | 1.20E-06 | 0.016                    | 0.007  | 0.007 | 0.37     | 0.008     | 0.031 | 0.80    | 0.024  | 0.056 | 0.68    |

|             |     |           |    |    | EXPOSURES: |        |       |          |                          |        |       |          | OUTCOMES: |       |         |        |       |         |
|-------------|-----|-----------|----|----|------------|--------|-------|----------|--------------------------|--------|-------|----------|-----------|-------|---------|--------|-------|---------|
|             |     |           |    |    | OPIOID USE |        |       |          | KNEE PAIN FOR 3 + MONTHS |        |       |          | MDD       |       |         | ASRD   |       |         |
| SNP         | CHR | POS       | EA | OA | eaf        | effect | se    | P-value  | eaf                      | effect | se    | P-value  | effect    | se    | P-value | effect | se    | P-value |
| rs13263652  | 8   | 139346461 | C  | T  | 0.378      | -0.051 | 0.011 | 4.80E-06 | 0.621                    | 0.001  | 0.002 | 0.46     | -0.001    | 0.009 | 0.88    | 0.008  | 0.018 | 0.65    |
| rs12554874  | 9   | 37073902  | T  | C  | 0.376      | -0.053 | 0.011 | 1.60E-06 | 0.374                    | 0.000  | 0.002 | 0.81     | -0.006    | 0.009 | 0.50    | 0.020  | 0.018 | 0.27    |
| rs13302047  | 9   | 81386827  | G  | C  | 0.192      | 0.069  | 0.014 | 3.60E-07 | 0.190                    | 0.001  | 0.002 | 0.55     | 0.013     | 0.011 | 0.24    | 0.042  | 0.021 | 0.04    |
| rs147463499 | 9   | 34990871  | T  | C  | 0.011      | -0.003 | 0.052 | 0.95     | 0.011                    | -0.042 | 0.009 | 2.70E-06 | -0.017    | 0.040 | 0.67    | 0.004  | 0.085 | 0.96    |
| rs4837022   | 9   | 128475379 | T  | C  | 0.357      | -0.054 | 0.011 | 1.40E-06 | 0.642                    | 0.000  | 0.002 | 0.82     | -0.001    | 0.010 | 0.96    | 0.022  | 0.018 | 0.21    |
| rs10159545  | 10  | 21766969  | G  | C  | 0.349      | 0.054  | 0.011 | 2.20E-06 | 0.352                    | 0.003  | 0.002 | 0.14     | -0.009    | 0.010 | 0.33    | 0.007  | 0.018 | 0.70    |
| rs761777    | 10  | 134938075 | G  | A  | 0.253      | 0.057  | 0.012 | 4.10E-06 | 0.257                    | 0.000  | 0.002 | 0.96     | 0.029     | 0.012 | 0.02    | 0.055  | 0.022 | 0.01    |
| rs1542724   | 11  | 46117183  | C  | A  | 0.269      | 0.057  | 0.012 | 2.70E-06 | 0.271                    | 0.002  | 0.002 | 0.40     | 0.013     | 0.010 | 0.19    | 0.012  | 0.019 | 0.53    |
| rs4763505   | 12  | 10477712  | T  | A  | 0.317      | -0.053 | 0.012 | 4.50E-06 | 0.683                    | 0.002  | 0.002 | 0.44     | -0.011    | 0.010 | 0.29    | 0.037  | 0.020 | 0.06    |
| rs56262049  | 13  | 42644705  | C  | T  | 0.182      | -0.066 | 0.014 | 2.50E-06 | 0.186                    | 0.002  | 0.002 | 0.51     | -0.011    | 0.012 | 0.35    | 0.026  | 0.022 | 0.25    |
| rs7319102   | 13  | 58252801  | G  | A  | 0.229      | 0.060  | 0.013 | 2.40E-06 | 0.772                    | 0.001  | 0.002 | 0.61     | 0.012     | 0.011 | 0.28    | 0.051  | 0.020 | 0.01    |
| rs11624521  | 14  | 73760832  | T  | C  | 0.193      | 0.064  | 0.014 | 3.10E-06 | 0.197                    | 0.003  | 0.002 | 0.17     | -0.009    | 0.011 | 0.40    | 0.020  | 0.022 | 0.37    |
| rs113544339 | 15  | 86576076  | G  | T  | 0.023      | -0.166 | 0.036 | 3.60E-06 | 0.024                    | -0.009 | 0.006 | 0.13     | -0.047    | 0.031 | 0.13    | 0.067  | 0.061 | 0.27    |
| rs12594013  | 15  | 75596353  | T  | C  | 0.263      | 0.058  | 0.012 | 2.00E-06 | 0.267                    | 0.001  | 0.002 | 0.61     | -0.009    | 0.011 | 0.41    | 0.002  | 0.020 | 0.93    |
| rs2289739   | 15  | 41801512  | T  | G  | 0.343      | 0.054  | 0.011 | 2.00E-06 | 0.348                    | 0.000  | 0.002 | 0.83     | 0.009     | 0.010 | 0.36    | 0.010  | 0.018 | 0.59    |
| rs975376    | 16  | 73100503  | C  | G  | 0.164      | 0.071  | 0.015 | 1.00E-06 | 0.169                    | 0.006  | 0.002 | 0.03     | -0.006    | 0.013 | 0.65    | 0.014  | 0.025 | 0.58    |
| rs9898793   | 17  | 43116313  | T  | C  | 0.261      | 0.056  | 0.012 | 4.20E-06 | 0.262                    | 0.003  | 0.002 | 0.17     | 0.022     | 0.011 | 0.03    | 0.013  | 0.020 | 0.51    |
| rs2297197   | 20  | 44673546  | G  | C  | 0.281      | 0.060  | 0.012 | 7.70E-07 | 0.288                    | -0.003 | 0.002 | 0.14     | 0.028     | 0.010 | 0.006   | 0.028  | 0.020 | 0.15    |
| rs6141277   | 20  | 30831157  | C  | G  | 0.392      | 0.052  | 0.011 | 2.20E-06 | 0.393                    | 0.000  | 0.002 | 0.85     | 0.006     | 0.009 | 0.52    | 0.045  | 0.017 | 0.00    |
| rs73228014  | 21  | 42752754  | A  | G  | 0.024      | 0.161  | 0.035 | 3.80E-06 | 0.023                    | -0.006 | 0.006 | 0.34     | 0.010     | 0.052 | 0.85    | NA     | NA    | NA      |

<sup>a</sup>For outcome phenotype MDD, summary statistics on MV instruments extracted from PGC GWAS excluding both UK Biobank (N = 29740) and 23andMe cohorts for total N = 143265 (no sample overlap).

|                       |                                                             |
|-----------------------|-------------------------------------------------------------|
| <b>Abbreviations:</b> |                                                             |
| MRC-IEU               | MRC Integrative Epidemiology Unit, University of Bristol UK |

|         |                                                                |  |
|---------|----------------------------------------------------------------|--|
| beta    | effect estimate                                                |  |
| se      | standard error of effect estimate                              |  |
| SNP     | single nucleotide polymorphism rsid variant identifier         |  |
| CHR     | chromosome                                                     |  |
| POS     | base pair position                                             |  |
| eaf     | effect allele frequency                                        |  |
| p-value | p value of effect estimate                                     |  |
| MDD     | Major depression/ major depressive disorder: outcome phenotype |  |
| ASRD    | Anxiety and stress-related disorder: outcome phenotype         |  |



**eTable 14. Multivariable Instruments for Prescription Opioid Use and Headache Pain for 3+ Months in UKB Participants on MDD and ASRD: Harmonized Data<sup>a</sup>**

|             |     |           |    |    | EXPOSURES: |        |       |          |                         |        |       |          | OUTCOMES: |       |         |        |       |         |      |
|-------------|-----|-----------|----|----|------------|--------|-------|----------|-------------------------|--------|-------|----------|-----------|-------|---------|--------|-------|---------|------|
|             |     |           |    |    | OPIOID USE |        |       |          | HEADACHES FOR 3+ MONTHS |        |       |          | MDD       |       |         | ASRD   |       |         |      |
| SNP         | CHR | POS       | EA | OA | eaf        | effect | se    | P-value  | eaf                     | effect | se    | P-value  | effect    | se    | P-value | effect | se    | P-value |      |
| rs1050316   | 1   | 156434703 | G  | T  | 0.346      | 0.010  | 0.011 | 0.38     | 0.645                   | 0.011  | 0.002 | 4.80E-06 | -0.009    | 0.010 | 0.35    | -      | 0.028 | 0.018   | 0.13 |
| rs10797381  | 1   | 3072482   | A  | T  | 0.229      | 0.011  | 0.013 | 0.39     | 0.237                   | 0.015  | 0.003 | 7.00E-08 | -0.014    | 0.012 | 0.25    | 0.004  | 0.021 | 0.86    |      |
| rs10864035  | 1   | 207208335 | T  | C  | 0.408      | 0.015  | 0.011 | 0.16     | 0.407                   | 0.011  | 0.002 | 1.30E-06 | 0.007     | 0.009 | 0.45    | 0.042  | 0.017 | 0.02    |      |
| rs127204    | 1   | 112277693 | C  | A  | 0.400      | 0.059  | 0.011 | 8.50E-08 | 0.403                   | 0.003  | 0.002 | 0.15     | 0.008     | 0.009 | 0.41    | 0.010  | 0.018 | 0.58    |      |
| rs2036100   | 1   | 205907872 | G  | C  | 0.387      | 0.007  | 0.011 | 0.50     | 0.390                   | 0.011  | 0.002 | 2.10E-06 | -0.014    | 0.010 | 0.16    | -      | 0.013 | 0.018   | 0.46 |
| rs945211    | 1   | 32191798  | G  | C  | 0.383      | -0.051 | 0.011 | 3.20E-06 | 0.616                   | -0.002 | 0.002 | 0.30     | -0.010    | 0.010 | 0.30    | 0.000  | 0.019 | 0.99    |      |
| rs12618833  | 2   | 53864413  | T  | C  | 0.063      | -0.021 | 0.022 | 0.34     | 0.067                   | 0.022  | 0.005 | 2.40E-06 | 0.013     | 0.018 | 0.47    | -      | 0.013 | 0.034   | 0.71 |
| rs139152977 | 2   | 199098906 | A  | T  | 0.025      | 0.164  | 0.034 | 1.90E-06 | 0.027                   | -0.013 | 0.007 | 0.07     | 0.010     | 0.030 | 0.74    | 0.044  | 0.056 | 0.43    |      |
| rs16846013  | 2   | 212250195 | A  | G  | 0.211      | 0.019  | 0.013 | 0.16     | 0.214                   | 0.014  | 0.003 | 9.60E-07 | 0.018     | 0.011 | 0.10    | 0.016  | 0.021 | 0.45    |      |
| rs6431647   | 2   | 234809496 | C  | T  | 0.337      | -0.041 | 0.011 | 3.10E-04 | 0.329                   | -0.011 | 0.002 | 3.20E-06 | -0.015    | 0.010 | 0.13    | 0.006  | 0.018 | 0.73    |      |
| rs13086611  | 3   | 49385417  | T  | A  | 0.303      | -0.054 | 0.012 | 3.30E-06 | 0.305                   | 0.001  | 0.003 | 0.65     | -0.022    | 0.010 | 0.04    | 0.002  | 0.019 | 0.91    |      |
| rs140729888 | 3   | 10521537  | C  | T  | 0.015      | -0.205 | 0.045 | 4.30E-06 | 0.016                   | -0.005 | 0.009 | 0.58     | -0.087    | 0.036 | 0.01    | 0.006  | 0.059 | 0.92    |      |
| rs150448008 | 3   | 126884057 | T  | C  | 0.011      | -0.044 | 0.051 | 0.39     | 0.012                   | -0.051 | 0.011 | 2.90E-06 | 0.003     | 0.036 | 0.92    | 0.056  | 0.063 | 0.38    |      |
| rs247975    | 3   | 173107443 | T  | C  | 0.467      | -0.050 | 0.011 | 3.80E-06 | 0.537                   | 0.001  | 0.002 | 0.70     | -0.006    | 0.009 | 0.53    | -      | 0.001 | 0.017   | 0.97 |
| rs7631941   | 3   | 80480052  | T  | C  | 0.131      | 0.073  | 0.016 | 4.90E-06 | 0.131                   | -0.001 | 0.003 | 0.85     | -0.016    | 0.014 | 0.24    | 0.008  | 0.027 | 0.77    |      |
| rs13107325  | 4   | 103188709 | T  | C  | 0.074      | 0.100  | 0.020 | 1.10E-06 | 0.075                   | -0.009 | 0.004 | 0.05     | -0.027    | 0.020 | 0.17    | -      | 0.013 | 0.041   | 0.75 |
| rs76034781  | 4   | 3272782   | A  | G  | 0.077      | 0.098  | 0.020 | 1.20E-06 | 0.078                   | -0.009 | 0.004 | 0.04     | 0.038     | 0.021 | 0.07    | 0.096  | 0.031 | 0.002   |      |
| rs769657    | 4   | 140877659 | G  | A  | 0.330      | -0.053 | 0.011 | 4.80E-06 | 0.328                   | -0.005 | 0.002 | 0.05     | -0.021    | 0.010 | 0.03    | -      | 0.030 | 0.019   | 0.11 |
| rs10063803  | 5   | 176667327 | C  | A  | 0.168      | -0.002 | 0.014 | 0.91     | 0.834                   | -0.015 | 0.003 | 1.70E-06 | -0.006    | 0.012 | 0.65    | -      | 0.011 | 0.023   | 0.62 |
| rs11746310  | 5   | 151391143 | C  | G  | 0.222      | 0.060  | 0.013 | 3.00E-06 | 0.223                   | 0.005  | 0.003 | 0.07     | 0.008     | 0.011 | 0.48    | 0.011  | 0.021 | 0.61    |      |
| rs7703548   | 5   | 28544070  | C  | A  | 0.052      | -0.005 | 0.024 | 0.85     | 0.055                   | 0.024  | 0.005 | 3.00E-06 | -0.027    | 0.020 | 0.18    | -      | 0.043 | 0.037   | 0.25 |

|             |     |           |    |    | EXPOSURES: |        |       |          |                         |        |       |          | OUTCOMES: |       |         |        |       |          |
|-------------|-----|-----------|----|----|------------|--------|-------|----------|-------------------------|--------|-------|----------|-----------|-------|---------|--------|-------|----------|
|             |     |           |    |    | OPIOID USE |        |       |          | HEADACHES FOR 3+ MONTHS |        |       |          | MDD       |       |         | ASRD   |       |          |
| SNP         | CHR | POS       | EA | OA | eaf        | effect | se    | P-value  | eaf                     | effect | se    | P-value  | effect    | se    | P-value | effect | se    | P-value  |
| rs1246939   | 6   | 4963177   | A  | C  | 0.340      | 0.017  | 0.012 | 0.14     | 0.342                   | 0.012  | 0.002 | 0.00     | 0.006     | 0.010 | 0.55    | -      | 0.019 | 0.15     |
| rs2814982   | 6   | 34546560  | T  | C  | 0.102      | 0.082  | 0.018 | 3.20E-06 | 0.103                   | 0.003  | 0.004 | 0.42     | -0.008    | 0.015 | 0.57    | 0.042  | 0.027 | 0.11     |
| rs34350244  | 6   | 32561465  | T  | C  | 0.192      | 0.064  | 0.014 | 3.30E-06 | 0.196                   | 0.001  | 0.003 | 0.77     | -0.002    | 0.013 | 0.90    | 0.019  | 0.024 | 0.43     |
| rs9399923   | 6   | 96850379  | G  | A  | 0.218      | 0.032  | 0.013 | 0.01     | 0.773                   | 0.014  | 0.003 | 3.70E-07 | 0.007     | 0.011 | 0.55    | 0.072  | 0.021 | 4.64E-04 |
| rs11764780  | 7   | 2020904   | C  | G  | 0.185      | -0.064 | 0.014 | 3.80E-06 | 0.183                   | -0.006 | 0.003 | 0.03     | -0.030    | 0.012 | 0.01    | 0.063  | 0.022 | 0.004    |
| rs6975058   | 7   | 53040800  | C  | A  | 0.058      | 0.036  | 0.023 | 0.11     | 0.060                   | 0.022  | 0.005 | 4.60E-06 | 0.017     | 0.020 | 0.38    | 0.028  | 0.036 | 0.45     |
| rs116944254 | 8   | 31813439  | T  | C  | 0.053      | 0.005  | 0.024 | 0.83     | 0.057                   | -0.023 | 0.005 | 4.70E-06 | 0.041     | 0.022 | 0.07    | 0.047  | 0.049 | 0.34     |
| rs117702299 | 8   | 106194797 | A  | G  | 0.017      | -0.049 | 0.042 | 0.25     | 0.018                   | -0.042 | 0.009 | 2.10E-06 | 0.016     | 0.034 | 0.64    | 0.023  | 0.060 | 0.70     |
| rs117710046 | 8   | 59430010  | T  | C  | 0.016      | 0.210  | 0.043 | 1.20E-06 | 0.017                   | -0.007 | 0.009 | 0.44     | 0.008     | 0.031 | 0.80    | 0.024  | 0.056 | 0.68     |
| rs13263652  | 8   | 139346461 | C  | T  | 0.378      | -0.051 | 0.011 | 4.80E-06 | 0.618                   | 0.001  | 0.002 | 0.65     | -0.001    | 0.009 | 0.88    | 0.008  | 0.018 | 0.65     |
| rs12554874  | 9   | 37073902  | T  | C  | 0.376      | -0.053 | 0.011 | 1.60E-06 | 0.376                   | 0.002  | 0.002 | 0.37     | -0.006    | 0.009 | 0.50    | 0.020  | 0.018 | 0.27     |
| rs13302047  | 9   | 81386827  | G  | C  | 0.192      | 0.069  | 0.014 | 3.60E-07 | 0.188                   | 0.007  | 0.003 | 0.01     | 0.013     | 0.011 | 0.24    | 0.042  | 0.021 | 0.04     |
| rs4837022   | 9   | 128475379 | T  | C  | 0.357      | -0.054 | 0.011 | 1.40E-06 | 0.639                   | 0.001  | 0.002 | 0.74     | -0.001    | 0.010 | 0.96    | 0.022  | 0.018 | 0.21     |
| rs7022359   | 9   | 119251502 | C  | T  | 0.418      | -0.013 | 0.011 | 0.22     | 0.411                   | -0.013 | 0.002 | 6.90E-08 | 0.001     | 0.009 | 0.95    | 0.010  | 0.018 | 0.55     |
| rs10159545  | 10  | 21766969  | G  | C  | 0.349      | 0.054  | 0.011 | 2.20E-06 | 0.353                   | -0.001 | 0.002 | 0.59     | -0.009    | 0.010 | 0.33    | 0.007  | 0.018 | 0.70     |
| rs761777    | 10  | 134938075 | G  | A  | 0.253      | 0.057  | 0.012 | 4.10E-06 | 0.256                   | 0.002  | 0.003 | 0.56     | 0.029     | 0.012 | 0.02    | 0.055  | 0.022 | 0.01     |
| rs1542724   | 11  | 46117183  | C  | A  | 0.269      | 0.057  | 0.012 | 2.70E-06 | 0.270                   | -0.003 | 0.003 | 0.25     | 0.013     | 0.010 | 0.19    | 0.012  | 0.019 | 0.53     |
| rs4763505   | 12  | 10477712  | T  | A  | 0.317      | -0.053 | 0.012 | 4.50E-06 | 0.682                   | 0.003  | 0.002 | 0.28     | -0.011    | 0.010 | 0.29    | 0.037  | 0.020 | 0.06     |
| rs7305700   | 12  | 57256380  | T  | A  | 0.386      | -0.009 | 0.011 | 0.41     | 0.624                   | -0.011 | 0.002 | 3.50E-06 | -0.015    | 0.009 | 0.10    | 0.003  | 0.018 | 0.85     |
| rs7970708   | 12  | 72734488  | G  | A  | 0.056      | -0.002 | 0.023 | 0.95     | 0.057                   | -0.023 | 0.005 | 4.50E-06 | 0.007     | 0.019 | 0.70    | 0.051  | 0.037 | 0.16     |
| rs139243823 | 13  | 104770199 | A  | G  | 0.014      | 0.037  | 0.047 | 0.42     | 0.016                   | 0.044  | 0.010 | 3.90E-06 | 0.076     | 0.052 | 0.14    | 0.082  | 0.089 | 0.35     |
| rs191154499 | 13  | 37484160  | T  | C  | 0.014      | -0.010 | 0.047 | 0.83     | 0.021                   | -0.042 | 0.009 | 1.40E-06 | 0.021     | 0.041 | 0.61    | NA     | NA    | NA       |
| rs56262049  | 13  | 42644705  | C  | T  | 0.182      | -0.066 | 0.014 | 2.50E-06 | 0.185                   | -0.001 | 0.003 | 0.76     | -0.011    | 0.012 | 0.35    | 0.026  | 0.022 | 0.25     |

|             |     |          |    |    | EXPOSURES: |        |       |          |                         |        |       |          | OUTCOMES: |       |         |        |       |         |
|-------------|-----|----------|----|----|------------|--------|-------|----------|-------------------------|--------|-------|----------|-----------|-------|---------|--------|-------|---------|
|             |     |          |    |    | OPIOID USE |        |       |          | HEADACHES FOR 3+ MONTHS |        |       |          | MDD       |       |         | ASRD   |       |         |
| SNP         | CHR | POS      | EA | OA | eaf        | effect | se    | P-value  | eaf                     | effect | se    | P-value  | effect    | se    | P-value | effect | se    | P-value |
| rs7319102   | 13  | 58252801 | G  | A  | 0.229      | 0.060  | 0.013 | 2.40E-06 | 0.773                   | 0.001  | 0.003 | 0.82     | 0.012     | 0.011 | 0.28    | 0.051  | 0.020 | 0.01    |
| rs11620998  | 14  | 99157430 | C  | T  | 0.375      | 0.000  | 0.011 | 0.98     | 0.621                   | 0.011  | 0.002 | 3.30E-06 | 0.003     | 0.009 | 0.72    | 0.014  | 0.018 | 0.45    |
| rs11624521  | 14  | 73760832 | T  | C  | 0.193      | 0.064  | 0.014 | 3.10E-06 | 0.198                   | 0.006  | 0.003 | 0.03     | -0.009    | 0.011 | 0.40    | -      | 0.022 | 0.37    |
| rs113544339 | 15  | 86576076 | G  | T  | 0.023      | -0.166 | 0.036 | 3.60E-06 | 0.024                   | -0.011 | 0.008 | 0.13     | -0.047    | 0.031 | 0.13    | 0.067  | 0.061 | 0.27    |
| rs12594013  | 15  | 75596353 | T  | C  | 0.263      | 0.058  | 0.012 | 2.00E-06 | 0.264                   | -0.003 | 0.003 | 0.30     | -0.009    | 0.011 | 0.41    | 0.002  | 0.020 | 0.93    |
| rs2289739   | 15  | 41801512 | T  | G  | 0.343      | 0.054  | 0.011 | 2.00E-06 | 0.348                   | 0.003  | 0.002 | 0.23     | 0.009     | 0.010 | 0.36    | 0.010  | 0.018 | 0.59    |
| rs55916483  | 16  | 6070256  | A  | G  | 0.119      | 0.003  | 0.017 | 0.87     | 0.127                   | 0.017  | 0.004 | 2.70E-06 | 0.013     | 0.015 | 0.39    | NA     | NA    | NA      |
| rs975376    | 16  | 73100503 | C  | G  | 0.164      | 0.071  | 0.015 | 1.00E-06 | 0.168                   | -0.004 | 0.003 | 0.22     | -0.006    | 0.013 | 0.65    | 0.014  | 0.025 | 0.58    |
| rs72848244  | 17  | 72195077 | C  | G  | 0.101      | -0.009 | 0.018 | 0.60     | 0.100                   | -0.018 | 0.004 | 3.80E-06 | 0.010     | 0.016 | 0.54    | 0.034  | 0.030 | 0.25    |
| rs9898793   | 17  | 43116313 | T  | C  | 0.261      | 0.056  | 0.012 | 4.20E-06 | 0.260                   | 0.005  | 0.003 | 0.05     | 0.022     | 0.011 | 0.03    | 0.013  | 0.020 | 0.51    |
| rs4987766   | 18  | 60904863 | G  | A  | 0.011      | 0.008  | 0.052 | 0.87     | 0.014                   | -0.048 | 0.010 | 2.70E-06 | -0.016    | 0.047 | 0.73    | NA     | NA    | NA      |
| rs660948    | 18  | 55146073 | C  | G  | 0.307      | -0.019 | 0.012 | 0.10     | 0.307                   | -0.014 | 0.003 | 1.90E-08 | -0.017    | 0.010 | 0.09    | 0.025  | 0.019 | 0.19    |
| rs2297197   | 20  | 44673546 | G  | C  | 0.281      | 0.060  | 0.012 | 7.70E-07 | 0.287                   | 0.000  | 0.003 | 0.99     | 0.028     | 0.010 | 0.006   | 0.028  | 0.020 | 0.15    |
| rs6012735   | 20  | 36291470 | G  | A  | 0.426      | -0.013 | 0.011 | 0.22     | 0.433                   | -0.011 | 0.002 | 2.60E-06 | 0.015     | 0.009 | 0.10    | 0.004  | 0.017 | 0.82    |
| rs6141277   | 20  | 30831157 | C  | G  | 0.392      | 0.052  | 0.011 | 2.20E-06 | 0.395                   | 0.005  | 0.002 | 0.03     | 0.006     | 0.009 | 0.52    | 0.045  | 0.017 | 0.009   |
| rs2845791   | 21  | 38035224 | T  | C  | 0.026      | 0.032  | 0.034 | 0.34     | 0.029                   | -0.034 | 0.007 | 1.80E-06 | 0.020     | 0.024 | 0.40    | 0.047  | 0.047 | 0.32    |
| rs73228014  | 21  | 42752754 | A  | G  | 0.024      | 0.161  | 0.035 | 3.80E-06 | 0.025                   | 0.007  | 0.007 | 0.34     | 0.010     | 0.052 | 0.85    | NA     | NA    | NA      |

<sup>a</sup> For outcome phenotype MDD, summary statistics on MV instruments extracted from PGC GWAS excluding both UK Biobank (N = 29740) and 23andMe cohorts for total N = 143265 (no sample overlap).

|                       |                                                             |
|-----------------------|-------------------------------------------------------------|
| <b>Abbreviations:</b> |                                                             |
| MRC-IEU               | MRC Integrative Epidemiology Unit, University of Bristol UK |
| beta                  | effect estimate                                             |
| se                    | standard error of effect estimate                           |
| SNP                   | single nucleotide polymorphism rsid variant identifier      |

|         |                                                                |  |
|---------|----------------------------------------------------------------|--|
| CHR     | chromosome                                                     |  |
| POS     | base pair position                                             |  |
| eaf     | effect allele frequency                                        |  |
| p-value | p value of effect estimate                                     |  |
| MDD     | Major depression/ major depressive disorder: outcome phenotype |  |
| ASRD    | Anxiety and stress-related disorder: outcome phenotype         |  |

**eTable 15. Bidirectional Single Variable Mendelian Randomization Results of Opioid Use Risk in UK Biobank Participants Versus Neuropsychiatric Disorders**

| EXPOSURE         | OUTCOME          | METHOD             | N SNPS | beta  | se   | LCI   | UCI  | OR   | OR LCI | OR UCI | P-value  | Q P-value | MR Presso P-value | Steiger P-value | Instrument strength <sup>c,d</sup><br>F-stat F-stat LCI |       |
|------------------|------------------|--------------------|--------|-------|------|-------|------|------|--------|--------|----------|-----------|-------------------|-----------------|---------------------------------------------------------|-------|
| OPIOID USE       | MDD <sup>a</sup> | MR Egger           | 26     | 0.15  | 0.12 | -0.08 | 0.38 | 1.17 | 0.92   | 1.47   | 0.21     | 0.24      |                   |                 |                                                         |       |
|                  |                  | Weighted median    | 26     | 0.16  | 0.05 | 0.07  | 0.26 | 1.18 | 1.07   | 1.30   | 9.69E-04 |           |                   |                 |                                                         |       |
|                  |                  | IVW                | 26     | 0.13  | 0.04 | 0.05  | 0.20 | 1.14 | 1.06   | 1.22   | 5.92E-04 | 0.29      | 0.28              | 2.94E-78        | 31.85                                                   | 30.04 |
|                  |                  | Weighted mode      | 26     | 0.17  | 0.09 | -0.01 | 0.34 | 1.18 | 0.99   | 1.41   | 0.07     |           |                   |                 |                                                         |       |
|                  |                  | MR Egger intercept |        | 0.00  | 0.01 | -0.02 | 0.01 | 1.00 | 0.98   | 1.01   | 0.82     |           |                   |                 |                                                         |       |
| OPIOID USE       | ASRD             | MR Egger           | 24     | -0.03 | 0.25 | -0.52 | 0.47 | 0.97 | 0.59   | 1.60   | 0.91     | 0.04      |                   |                 |                                                         |       |
|                  |                  | Weighted median    | 24     | 0.19  | 0.10 | -0.01 | 0.39 | 1.21 | 0.99   | 1.48   | 0.06     |           |                   |                 |                                                         |       |
|                  |                  | IVW                | 24     | 0.18  | 0.08 | 0.01  | 0.34 | 1.19 | 1.01   | 1.41   | 0.04     | 0.04      | 0.04              | 1.23E-18        | 0.010                                                   | 32.18 |
|                  |                  | Weighted mode      | 24     | 0.10  | 0.17 | -0.24 | 0.43 | 1.10 | 0.79   | 1.54   | 0.58     |           |                   |                 |                                                         |       |
|                  |                  | MR Egger intercept |        | 0.01  | 0.02 | -0.02 | 0.05 | 1.01 | 0.98   | 1.05   | 0.40     |           |                   |                 |                                                         |       |
|                  |                  | OUTLIER CORRECTED  |        |       |      |       |      |      |        |        |          |           |                   |                 |                                                         |       |
|                  |                  | MR Egger           | 23     | 0.23  | 0.24 | -0.25 | 0.70 | 1.26 | 0.78   | 2.02   | 0.36     | 0.19      |                   |                 |                                                         |       |
|                  |                  | Weighted median    | 23     | 0.20  | 0.10 | 0.00  | 0.40 | 1.22 | 1.00   | 1.49   | 0.05     |           |                   |                 |                                                         |       |
| MDD <sup>b</sup> | OPIOID USE       | IVW                | 23     | 0.22  | 0.07 | 0.07  | 0.36 | 1.24 | 1.07   | 1.44   | 0.004    | 0.24      | 0.16              | 2.15E-19        | 0.010                                                   | 32.57 |
|                  |                  | Weighted mode      | 23     | 0.03  | 0.20 | -0.36 | 0.42 | 1.03 | 0.70   | 1.53   | 0.87     |           |                   |                 |                                                         |       |
|                  |                  | MR Egger intercept |        | 0.00  | 0.02 | -0.03 | 0.03 | 1.00 | 0.97   | 1.03   | 0.96     |           |                   |                 |                                                         |       |
|                  |                  | MR Egger           | 72     | 0.43  | 0.22 | 0.01  | 0.85 | 1.54 | 1.01   | 2.34   | 0.05     | >0.99     |                   |                 |                                                         |       |
| MDD <sup>b</sup> | OPIOID USE       | Weighted median    | 72     | 0.22  | 0.07 | 0.09  | 0.35 | 1.25 | 1.10   | 1.42   | 0.001    |           |                   |                 |                                                         |       |
|                  |                  | IVW                | 72     | 0.17  | 0.05 | 0.07  | 0.26 | 1.18 | 1.08   | 1.30   | 4.45E-04 | >0.99     | >0.99             | 1.03E-14        | 0.005                                                   | 24.32 |
|                  |                  | Weighted mode      | 72     | 0.28  | 0.15 | -0.02 | 0.58 | 1.32 | 0.98   | 1.78   | 0.07     |           |                   |                 |                                                         |       |

| EXPOSURE | OUTCOME    | METHOD             | N SNPS | beta  | se   | LCI   | UCI  | OR   | OR LCI | OR UCI | P-value | Q P-value | MR      | Steiger | Instrument strength <sup>c,d</sup> |            |  |
|----------|------------|--------------------|--------|-------|------|-------|------|------|--------|--------|---------|-----------|---------|---------|------------------------------------|------------|--|
|          |            |                    |        |       |      |       |      |      |        |        |         |           | P-value | P-value | F-stat                             | F-stat LCI |  |
|          |            | MR Egger Intercept |        | -0.01 | 0.01 | -0.02 | 0.00 | 0.99 | 0.98   | 1.00   | 0.22    |           |         |         |                                    |            |  |
| ASRD     | OPIOID USE | MR Egger           | 17     | 0.01  | 0.13 | -0.24 | 0.26 | 1.01 | 0.78   | 1.30   | 0.94    | 0.07      |         |         |                                    |            |  |
|          |            | Weighted median    | 17     | -0.02 | 0.04 | -0.10 | 0.07 | 0.98 | 0.90   | 1.07   | 0.70    |           |         |         |                                    |            |  |
|          |            | IVW                | 17     | 0.04  | 0.04 | -0.03 | 0.11 | 1.04 | 0.97   | 1.12   | 0.29    | 0.09      | 0.21    | <0.001  | 25.02                              | 21.17      |  |
|          |            | Weighted mode      | 17     | -0.05 | 0.08 | -0.20 | 0.11 | 0.96 | 0.82   | 1.12   | 0.58    |           |         |         |                                    |            |  |
|          |            | MR Egger intercept |        | 0.00  | 0.01 | -0.02 | 0.03 | 1.00 | 0.98   | 1.03   | 0.81    |           |         |         |                                    |            |  |

<sup>a</sup> For outcome phenotype MDD, summary statistics on NSAIDs instruments extracted from PGC GWAS excluding both UK Biobank (N = 29740) and 23andMe cohorts for total N = 143265

<sup>b</sup> For exposure phenotype MDD, summary statistics on MDD instruments extracted from PGC GWAS including both UK Biobank (N = 29740) and 23andMe cohorts for total N = 480359 (% UKB = 5.6)

<sup>c</sup>  $R^2$  for each instrument variant:  $R^2 = [\text{beta.exposure}^2] / [\text{se.exposure}^2 * N + \text{beta.exposure}^2]$ ;  $R^2$  combined =  $\text{SUM}[R^2]$ , where  $\text{beta.exposure}$  = SNP exposure effect,  $\text{se.exposure}$  = standard error of SNP exposure effect

<sup>d</sup> Combined F-statistic (also lower bound thereof) calculated according to Burgess et al. (2016):  $[R^2_{\text{combined}} / (1 - R^2_{\text{combined}})] * [(N - K - 1) / K]$ , where N = GWAS sample size, K = number variants comprising instrument.

| Abbreviations:       |                                                               |
|----------------------|---------------------------------------------------------------|
| SVMR                 | Single-variable Mendelian randomization                       |
| IVW                  | Inverse variance weighted MR                                  |
| UKB                  | UK Biobank                                                    |
| N SNPs               | number of single nucleotide polymorphisms in instrument       |
| beta                 | MR effect estimate                                            |
| se                   | standard error of MR effect estimate                          |
| LCI                  | lower bound of 95% confidence interval of estimate            |
| UCI                  | upper bound of 95% confidence interval of estimate            |
| OR                   | odds ratio for binary outcome                                 |
| OR LCI               | lower bound of 95% confidence interval of odds ratio estimate |
| OR UCI               | upper bound of 95% confidence interval of odds ratio estimate |
| P-value              | P-value of MR effect estimate                                 |
| Heterogeneity Tests: |                                                               |
| Q P-value            | Cochran Q statistic P-value                                   |
| MR PRESSO test:      |                                                               |

|                              |                                                                                                  |
|------------------------------|--------------------------------------------------------------------------------------------------|
| RSSobs                       | residual sums of squares of observations                                                         |
| P-value                      | P-value of global test                                                                           |
| <b>Directionality test</b>   |                                                                                                  |
| SNPs R <sup>2</sup> exposure | variance in exposure explained by exposure instruments                                           |
| SNPs R <sup>2</sup> outcome  | variance in outcome explained by exposure instruments                                            |
| Steiger p-value              | strength of evidence against null hypotheses in favor of alternative direction of causality TRUE |
| <b>Instrument strength</b>   |                                                                                                  |
| F-stat                       | F-statistic                                                                                      |
| F-stat LCI                   | lower bound 95% confidence interval of F-stat                                                    |
|                              |                                                                                                  |

**eTable 16. Bidirectional Single Variable Mendelian Randomization Results of Salicylic Acid and Derivatives Use Risk in UK Biobank Participants Versus Neuropsychiatric Disorders**

| EXPOSURE           | OUTCOME            | METHOD             | N SNPs | beta  | se   | LCI   | UCI  | OR   | OR LCI | OR UCI | P-value | Q P-value | MR      | Steiger  | Instrument strength <sup>c,d</sup> |            |  |
|--------------------|--------------------|--------------------|--------|-------|------|-------|------|------|--------|--------|---------|-----------|---------|----------|------------------------------------|------------|--|
|                    |                    |                    |        |       |      |       |      |      |        |        |         |           | P-value | P-value  | F-stat                             | F-stat LCI |  |
| SALICYLIC ACID USE | MDD <sup>a</sup>   | MR Egger           | 27     | -0.19 | 0.12 | -0.42 | 0.04 | 0.83 | 0.66   | 1.04   | 0.12    | 0.34      |         |          |                                    |            |  |
|                    |                    | Weighted median    | 27     | 0.04  | 0.06 | -0.08 | 0.16 | 1.04 | 0.92   | 1.18   | 0.52    |           |         |          |                                    |            |  |
|                    |                    | IVW                | 27     | 0.07  | 0.05 | -0.03 | 0.17 | 1.07 | 0.97   | 1.18   | 0.15    | 0.15      | 0.09    | <0.001   | 43.55                              | 39.46      |  |
|                    |                    | Weighted mode      | 27     | 0.02  | 0.11 | -0.18 | 0.23 | 1.02 | 0.83   | 1.26   | 0.84    |           |         |          |                                    |            |  |
|                    |                    | MR Egger intercept |        | 0.02  | 0.01 | 0.00  | 0.03 | 1.02 | 1.00   | 1.03   | 0.02    |           |         |          |                                    |            |  |
| SALICYLIC ACID USE | ASRD               | MR Egger           | 21     | -0.08 | 0.26 | -0.59 | 0.42 | 0.92 | 0.56   | 1.52   | 0.75    | 0.87      |         |          |                                    |            |  |
|                    |                    | Weighted median    | 21     | 0.13  | 0.12 | -0.09 | 0.36 | 1.14 | 0.91   | 1.44   | 0.25    |           |         |          |                                    |            |  |
|                    |                    | IVW                | 21     | 0.17  | 0.09 | 0.00  | 0.34 | 1.18 | 1.00   | 1.40   | 0.05    | 0.86      | 0.87    | 1.50E-25 | 0.009                              | 44.02      |  |
|                    |                    | Weighted mode      | 21     | 0.12  | 0.17 | -0.22 | 0.46 | 1.13 | 0.81   | 1.58   | 0.49    |           |         |          |                                    |            |  |
|                    |                    | MR Egger intercept |        | 0.02  | 0.02 | -0.01 | 0.05 | 1.02 | 0.99   | 1.05   | 0.31    |           |         |          |                                    |            |  |
| MDD <sup>b</sup>   | SALICYLIC ACID USE | MR Egger           | 93     | 0.20  | 0.15 | -0.09 | 0.49 | 1.22 | 0.91   | 1.63   | 0.18    | 0.46      |         |          |                                    |            |  |
|                    |                    | Weighted median    | 93     | 0.10  | 0.05 | 0.01  | 0.19 | 1.11 | 1.01   | 1.21   | 0.02    |           |         |          |                                    |            |  |
|                    |                    | IVW                | 93     | 0.10  | 0.03 | 0.03  | 0.16 | 1.10 | 1.03   | 1.17   | 0.00    | 0.48      | 0.50    | 7.30E-44 | 0.006                              | 30.97      |  |
|                    |                    | Weighted mode      | 93     | 0.14  | 0.11 | -0.08 | 0.36 | 1.15 | 0.92   | 1.43   | 0.22    |           |         |          |                                    |            |  |
|                    |                    | MR Egger Intercept |        | 0.00  | 0.00 | -0.01 | 0.01 | 1.00 | 0.99   | 1.01   | 0.47    |           |         |          |                                    |            |  |
| ASRD               | SALICYLIC ACID USE | MR Egger           | 10     | -0.02 | 0.09 | -0.19 | 0.15 | 0.98 | 0.82   | 1.16   | 0.79    | 0.91      |         |          |                                    |            |  |
|                    |                    | Weighted median    | 10     | 0.06  | 0.04 | -0.02 | 0.13 | 1.06 | 0.98   | 1.14   | 0.13    |           |         |          |                                    |            |  |
|                    |                    | IVW                | 10     | 0.05  | 0.03 | -0.01 | 0.10 | 1.05 | 0.99   | 1.11   | 0.11    | 0.90      | 0.91    | <0.001   | 22.91                              | 18.16      |  |



| EXPOSURE | OUTCOME | METHOD             | N SNPs | beta  | se   | LCI   | UCI  | OR   | OR LCI | OR UCI | P-value | Q P-value | MR      | Steiger | Instrument strength <sup>c,d</sup> |            |  |
|----------|---------|--------------------|--------|-------|------|-------|------|------|--------|--------|---------|-----------|---------|---------|------------------------------------|------------|--|
|          |         |                    |        |       |      |       |      |      |        |        |         |           | P-value | P-value | F-stat                             | F-stat LCI |  |
|          |         | Weighted mode      | 10     | 0.08  | 0.06 | -0.05 | 0.20 | 1.08 | 0.96   | 1.22   | 0.25    |           |         |         |                                    |            |  |
|          |         | MR Egger Intercept |        | -0.19 | 0.12 | -0.42 | 0.04 | 0.83 | 0.66   | 1.04   | 0.12    |           |         |         |                                    |            |  |
|          |         |                    |        |       |      |       |      |      |        |        |         |           |         |         |                                    |            |  |

<sup>a</sup> For outcome phenotype MDD, summary statistics on NSAIDs instruments extracted from PGC GWAS excluding both UK Biobank (N = 29740) 23andMe cohorts for total N = 143265

<sup>b</sup> For exposure phenotype MDD, summary statistics on MDD instruments extracted from PGC GWAS including both UK Biobank (N = 29740) and 23andMe cohorts for total N = 480359 (% UKB = 5.6)

<sup>c</sup>  $R^2$  for each instrument variant:  $R^2 = [\text{beta.exposure}^2] / [\text{se.exposure}^2 * N + \text{beta.exposure}^2]$ ;  $R^2$  combined =  $\text{SUM}[R^2]$ , where  $\text{beta.exposure}$  = SNP exposure effect,  $\text{se.exposure}$  = standard error of SNP exposure effect

<sup>d</sup> Combined F-statistic (also lower bound thereof) calculated according to Burgess et al. (2016):  $[R^2_{\text{combined}} / (1 - R^2_{\text{combined}})] * [(N - K - 1) / K]$ , where N = GWAS sample size, K = number variants comprising instrument.

| Abbreviations:       |                                                               |
|----------------------|---------------------------------------------------------------|
| SVMR                 | Single-variable Mendelian randomization                       |
| IVW                  | Inverse variance weighted MR                                  |
| UKB                  | UK Biobank                                                    |
| N SNPs               | number of single nucleotide polymorphisms in instrument       |
| beta                 | MR effect estimate                                            |
| se                   | standard error of MR effect estimate                          |
| LCI                  | lower bound of 95% confidence interval of estimate            |
| UCI                  | upper bound of 95% confidence interval of estimate            |
| OR                   | odds ratio for binary outcome                                 |
| OR LCI               | lower bound of 95% confidence interval of odds ratio estimate |
| OR UCI               | upper bound of 95% confidence interval of odds ratio estimate |
| P-value              | P-value of MR effect estimate                                 |
| Heterogeneity Tests: |                                                               |
| Q                    | Q statistic                                                   |
| Q df                 | Q statistic degrees of freedom                                |
| Q P-value            | Q statistic P-value                                           |
| MR PRESSO test:      |                                                               |
| RSSobs               | residual sums of squares of observations                      |
| P-value              | P-value of global test                                        |
| Directionality test  |                                                               |
| SNPs $R^2$ exposure  | variance in exposure explained by exposure instruments        |
| SNPs $R^2$ outcome   | variance in outcome explained by exposure instruments         |

|                            |                                                                                                  |
|----------------------------|--------------------------------------------------------------------------------------------------|
| Steiger p-value            | strength of evidence against null hypotheses in favor of alternative direction of causality TRUE |
| <b>Instrument strength</b> |                                                                                                  |
| F-stat                     | F-statistic                                                                                      |
| F-stat LCI                 | lower bound 95% confidence interval of F-stat                                                    |
|                            |                                                                                                  |

**eTable 17. Bidirectional Single Variable Mendelian Randomization Results of Anilide Use Risk in UK Biobank Participants Versus Neuropsychiatric Disorders**

| EXPOSURE         | OUTCOME          | METHOD             | N SNPs | beta  | se   | LCI   | UCI  | OR   | OR LCI | OR UCI | P-value  | Q P-value | MR      | Steiger  | Instrument strength <sup>c,d</sup> |            |
|------------------|------------------|--------------------|--------|-------|------|-------|------|------|--------|--------|----------|-----------|---------|----------|------------------------------------|------------|
|                  |                  |                    |        |       |      |       |      |      |        |        |          |           | P-value | P-value  | F-stat                             | F-stat LCI |
| ANILIDE USE      | MDD <sup>a</sup> | MR Egger           | 29     | 0.05  | 0.23 | -0.40 | 0.50 | 1.05 | 0.67   | 1.64   | 0.82     | 0.24      |         |          |                                    |            |
|                  |                  | Weighted median    | 29     | 0.13  | 0.08 | -0.03 | 0.29 | 1.14 | 0.97   | 1.34   | 0.10     |           |         |          |                                    |            |
|                  |                  | IVW                | 29     | 0.13  | 0.06 | 0.01  | 0.24 | 1.14 | 1.01   | 1.27   | 0.03     | 0.28      | 0.28    | 1.29E-44 | 19.04                              | 16.48      |
|                  |                  | Weighted mode      | 29     | 0.14  | 0.17 | -0.18 | 0.46 | 1.15 | 0.83   | 1.59   | 0.42     |           |         |          |                                    |            |
|                  |                  | MR Egger intercept |        | 0.00  | 0.01 | -0.01 | 0.02 | 1.00 | 0.99   | 1.02   | 0.73     |           |         |          |                                    |            |
| ANILIDE USE      | ASRD             | MR Egger           | 28     | -0.16 | 0.42 | -0.99 | 0.66 | 0.85 | 0.37   | 1.94   | 0.70     | 0.53      |         |          |                                    |            |
|                  |                  | Weighted median    | 28     | -0.05 | 0.16 | -0.35 | 0.26 | 0.96 | 0.70   | 1.30   | 0.77     |           |         |          |                                    |            |
|                  |                  | IVW                | 28     | 0.01  | 0.11 | -0.20 | 0.22 | 1.01 | 0.82   | 1.25   | 0.93     | 0.58      | 0.58    | 5.63E-08 | 20.58                              | 19.23      |
|                  |                  | Weighted mode      | 28     | -0.18 | 0.35 | -0.86 | 0.50 | 0.83 | 0.42   | 1.65   | 0.61     |           |         |          |                                    |            |
|                  |                  | MR Egger intercept |        | 0.01  | 0.02 | -0.02 | 0.04 | 1.01 | 0.98   | 1.04   | 0.67     |           |         |          |                                    |            |
| MDD <sup>b</sup> | ANILIDE USE      | MR Egger           | 89     | 0.13  | 0.14 | -0.15 | 0.41 | 1.14 | 0.86   | 1.50   | 0.36     | 0.06      |         |          |                                    |            |
|                  |                  | Weighted median    | 89     | 0.20  | 0.04 | 0.13  | 0.28 | 1.22 | 1.13   | 1.32   | 2.21E-07 |           |         |          |                                    |            |
|                  |                  | IVW                | 89     | 0.19  | 0.03 | 0.13  | 0.24 | 1.20 | 1.14   | 1.28   | 4.30E-10 | 0.07      | 0.08    | 2.93E-59 | 29.95                              | 30.24      |
|                  |                  | Weighted mode      | 89     | 0.25  | 0.10 | 0.06  | 0.44 | 1.28 | 1.06   | 1.55   | 0.01     |           |         |          |                                    |            |
|                  |                  | MR Egger intercept |        | 0.00  | 0.00 | -0.01 | 0.01 | 1.00 | 0.99   | 1.01   | 0.69     |           |         |          |                                    |            |
| ASRD             | ANILIDE USE      | MR Egger           | 17     | -0.01 | 0.08 | -0.16 | 0.14 | 0.99 | 0.85   | 1.15   | 0.86     | 0.07      |         |          |                                    |            |
|                  |                  | Weighted median    | 17     | 0.00  | 0.03 | -0.05 | 0.06 | 1.00 | 0.95   | 1.06   | 0.92     |           |         |          |                                    |            |
|                  |                  | IVW                | 17     | 0.02  | 0.02 | -0.03 | 0.06 | 1.02 | 0.97   | 1.06   | 0.43     | 0.09      | 0.09    | <.001    | 25.02                              | 21.17      |

| EXPOSURE | OUTCOME | METHOD             | N SNPs | beta | se   | LCI   | UCI  | OR   | OR LCI | OR UCI | P-value | Q P-value | MR Presso P-value | Steiger P-value | Instrument strength <sup>c,d</sup><br>F-stat<br>F-stat LCI |  |
|----------|---------|--------------------|--------|------|------|-------|------|------|--------|--------|---------|-----------|-------------------|-----------------|------------------------------------------------------------|--|
|          |         | Weighted mode      | 17     | 0.00 | 0.05 | -0.11 | 0.10 | 1.00 | 0.90   | 1.11   | 0.95    |           |                   |                 |                                                            |  |
|          |         | MR Egger intercept |        | 0.00 | 0.01 | -0.01 | 0.02 | 1.00 | 0.99   | 1.02   | 0.68    |           |                   |                 |                                                            |  |
|          |         |                    |        |      |      |       |      |      |        |        |         |           |                   |                 |                                                            |  |

<sup>a</sup> For outcome phenotype MDD, summary statistics on NSAIDs instruments extracted from PGC GWAS excluding both UK Biobank (N = 29740) 23andMe cohorts for total N = 143265

<sup>b</sup> For exposure phenotype MDD, summary statistics on MDD instruments extracted from PGC GWAS including both UK Biobank (N = 29740) and 23andMe cohorts for total N = 480359 (% UKB = 5.6)

<sup>c</sup>  $R^2$  for each instrument variant:  $R^2 = [\text{beta.exposure}^2] / [\text{se.exposure}^2 * N + \text{beta.exposure}^2]$ ;  $R^2$  combined =  $\text{SUM}[R^2]$ , where beta.exposure = SNP exposure effect, se. exposure = standard error of SNP exposure effect

<sup>d</sup> Combined F-statistic (also lower bound thereof) calculated according to Burgess et al. (2016):  $[R^2 \text{combined} / (1 - R^2 \text{combined})] * [(N - K - 1) / K]$ , where N = GWAS sample size, K = number variants comprising instrument.

| Abbreviations:       |                                                               |
|----------------------|---------------------------------------------------------------|
| SVMR                 | Single-variable Mendelian randomization                       |
| IVW                  | Inverse variance weighted MR                                  |
| UKB                  | UK Biobank                                                    |
| N SNPs               | number of single nucleotide polymorphisms in instrument       |
| beta                 | MR effect estimate                                            |
| se                   | standard error of MR effect estimate                          |
| LCI                  | lower bound of 95% confidence interval of estimate            |
| UCI                  | upper bound of 95% confidence interval of estimate            |
| OR                   | odds ratio for binary outcome                                 |
| OR LCI               | lower bound of 95% confidence interval of odds ratio estimate |
| OR UCI               | upper bound of 95% confidence interval of odds ratio estimate |
| P-value              | P-value of MR effect estimate                                 |
| Heterogeneity Tests: |                                                               |
| Q                    | Q statistic                                                   |
| Q df                 | Q statistic degrees of freedom                                |
| Q P-value            | Q statistic P-value                                           |
| MR PRESSO test:      |                                                               |
| RSSobs               | residual sums of squares of observations                      |
| P-value              | P-value of global test                                        |
| Directionality test  |                                                               |
| SNPs $R^2$ exposure  | variance in exposure explained by exposure instruments        |
| SNPs $R^2$ outcome   | variance in outcome explained by exposure instruments         |

|                            |                                                       |
|----------------------------|-------------------------------------------------------|
| <b>Instrument strength</b> |                                                       |
| <i>F</i> -stat             | F-statistic                                           |
| <i>F</i> -stat LCI         | lower bound 95% confidence interval of <i>F</i> -stat |

**eTable 18. Bidirectional Single Variable Mendelian Randomization Results of NSAID Use Risk in UK Biobank Participants Versus Neuropsychiatric Disorders**

| EXPOSURE               | OUTCOME                | METHOD             | N SNPs | beta | se   | LCI   | UCI  | OR   | OR LCI   | OR UCI | P-value  | Q P-value | MR-PRESSO P-value | Steiger P-value | Instrument strength <sup>c,d</sup><br>F-stat F-stat LCI |       |  |
|------------------------|------------------------|--------------------|--------|------|------|-------|------|------|----------|--------|----------|-----------|-------------------|-----------------|---------------------------------------------------------|-------|--|
| <b>NSAID USE</b>       | <b>MDD<sup>a</sup></b> | MR Egger           | 29     | 0.10 | 0.18 | -0.24 | 0.45 | 1.11 | 0.78     | 1.58   | 0.56     | 0.56      |                   |                 |                                                         |       |  |
|                        |                        | Weighted median    | 29     | 0.18 | 0.07 | 0.05  | 0.31 | 1.20 | 1.05     | 1.37   | 0.008    |           |                   |                 |                                                         |       |  |
|                        |                        | IVW                | 29     | 0.11 | 0.05 | 0.02  | 0.21 | 1.12 | 1.02     | 1.23   | 0.02     | 0.61      | 0.30              | 3.76E-57        | 32.09                                                   | 28.72 |  |
|                        |                        | Weighted mode      | 29     | 0.29 | 0.14 | 0.02  | 0.56 | 1.34 | 1.02     | 1.76   | 0.04     |           |                   |                 |                                                         |       |  |
|                        |                        | MR Egger intercept | 29     | 0.00 | 0.01 | -0.02 | 0.02 | 1.00 | 0.99     | 1.02   | 0.97     |           |                   |                 |                                                         |       |  |
| <b>NSAID USE</b>       | <b>ASRD</b>            | MR Egger           | 29     | 0.17 | 0.42 | -0.66 | 0.99 | 1.18 | 0.52     | 2.68   | 0.70     | 0.66      |                   |                 |                                                         |       |  |
|                        |                        | Weighted median    | 29     | 0.12 | 0.14 | -0.15 | 0.39 | 1.13 | 0.86     | 1.47   | 0.38     |           |                   |                 |                                                         |       |  |
|                        |                        | IVW                | 29     | 0.25 | 0.10 | 0.06  | 0.44 | 1.29 | 1.06     | 1.56   | 0.01     | 0.71      | 0.81              | 3.40E-09        | 25.52                                                   | 22.52 |  |
|                        |                        | Weighted mode      | 29     | 0.02 | 0.26 | -0.50 | 0.54 | 1.02 | 0.61     | 1.71   | 0.95     |           |                   |                 |                                                         |       |  |
|                        |                        | MR Egger intercept | 29     | 0.00 | 0.02 | -0.03 | 0.04 | 1.00 | 0.97     | 1.04   | 0.83     |           |                   |                 |                                                         |       |  |
| <b>MDD<sup>b</sup></b> | <b>NSAID USE</b>       | MR Egger           | 93     | 0.07 | 0.15 | -0.22 | 0.36 | 1.07 | 0.81     | 1.43   | 0.63     | 0.04      |                   |                 |                                                         |       |  |
|                        |                        | Weighted median    | 93     | 0.16 | 0.04 | 0.08  | 0.24 | 1.17 | 1.08     | 1.27   | 1.30E-04 |           |                   |                 |                                                         |       |  |
|                        |                        | IVW                | 93     | 0.13 | 0.03 | 0.07  | 0.19 | 1.14 | 1.08     | 1.21   | 1.68E-05 | 0.04      | 0.5               | 1.11E-44        | 32.10                                                   | 30.24 |  |
|                        |                        | Weighted mode      | 93     | 0.22 | 0.11 | 0.01  | 0.43 | 1.24 | 1.01     | 1.54   | 0.05     |           |                   |                 |                                                         |       |  |
|                        |                        | MR Egger intercept |        | 0.00 | 0.00 | -0.01 | 0.01 | 1.00 | 0.99     | 1.01   | 0.66     |           |                   |                 |                                                         |       |  |
|                        |                        | OUTLIER CORRECTED  |        |      |      |       |      |      |          |        |          |           |                   |                 |                                                         |       |  |
|                        |                        | MR Egger           | 92     | 0.08 | 0.14 | -0.19 | 0.35 | 1.08 | 0.82     | 1.43   | 0.57     | 0.13      |                   |                 |                                                         |       |  |
|                        |                        | Weighted median    | 92     | 0.16 | 0.04 | 0.08  | 0.24 | 1.17 | 1.08     | 1.27   | 1.33E-04 |           |                   |                 |                                                         |       |  |
| IVW                    | 92                     | 0.14               | 0.03   | 0.08 | 0.20 | 1.15  | 1.09 | 1.22 | 1.77E-06 | 0.14   | 0.16     | 2.10E-45  | 32.29             | 30.37           |                                                         |       |  |

| EXPOSURE    | OUTCOME          | METHOD             | N SNPs | beta | se   | LCI   | UCI  | OR   | OR LCI | OR UCI | P-value | Q P-value | MR-PRESSO | Steiger  | Instrument strength <sup>c,d</sup> |            |  |
|-------------|------------------|--------------------|--------|------|------|-------|------|------|--------|--------|---------|-----------|-----------|----------|------------------------------------|------------|--|
|             |                  |                    |        |      |      |       |      |      |        |        |         |           | P-value   | P-value  | F-stat                             | F-stat LCI |  |
|             |                  | Weighted mode      | 92     | 0.22 | 0.11 | 0.01  | 0.43 | 1.25 | 1.01   | 1.54   | 0.04    |           |           |          |                                    |            |  |
|             |                  | MR Egger intercept |        | 0.00 | 0.00 | -0.01 | 0.01 | 1.00 | 0.99   | 1.01   | 0.65    |           |           |          |                                    |            |  |
|             |                  |                    |        |      |      |       |      |      |        |        |         |           |           |          |                                    |            |  |
| <b>ASRD</b> | <b>NSAID USE</b> | MR Egger           | 17     | 0.05 | 0.09 | 0.59  | 0.21 | 1.05 | 1.81   | 1.24   | 0.59    | 0.03      | 0.19      | 5.64E-57 | 24.45                              | 21.83      |  |
|             |                  | Weighted median    | 17     | 0.02 | 0.03 | 0.57  | 0.07 | 1.02 | 1.77   | 1.08   | 0.57    |           |           |          |                                    |            |  |
|             |                  | IVW                | 17     | 0.01 | 0.03 | 0.80  | 0.06 | 1.01 | 2.23   | 1.06   | 0.80    | 0.04      |           |          |                                    |            |  |
|             |                  | Weighted mode      | 17     | 0.03 | 0.05 | 0.53  | 0.14 | 1.03 | 1.71   | 1.15   | 0.53    |           |           |          |                                    |            |  |
|             |                  | MR Egger intercept |        | 0.00 | 0.01 | 0.53  | 0.01 | 1.00 | 1.71   | 1.01   | 0.63    |           |           |          |                                    |            |  |
|             |                  |                    |        |      |      |       |      |      |        |        |         |           |           |          |                                    |            |  |

<sup>a</sup> For outcome phenotype MDD, summary statistics on NSAIDs instruments extracted from PGC GWAS excluding both UK Biobank (N = 29740) 23andMe cohorts for total N = 143265

<sup>b</sup> For exposure phenotype MDD, summary statistics on MDD instruments extracted from PGC GWAS including both UK Biobank (N = 29740) and 23andMe cohorts for total N = 480359 (% UKB = 5.6)

<sup>c</sup>  $R^2$  for each instrument variant:  $R^2 = [\text{beta.exposure}^2] / [\text{se.exposure}^2 * N + \text{beta.exposure}^2]$ ;  $R^2$  combined =  $\text{SUM}[R^2]$ , where  $\text{beta.exposure}$  = SNP exposure effect,  $\text{se.exposure}$  = standard error of SNP exposure effect

<sup>d</sup> Combined  $F$ -statistic (also lower bound thereof) calculated according to Burgess et al. (2016):  $[R^2_{\text{combined}} / (1 - R^2_{\text{combined}})] * [(N - K - 1) / K]$ , where  $N$  = GWAS sample size,  $K$  = number variants comprising instrument.

| <b>Abbreviations:</b>       |                                                               |
|-----------------------------|---------------------------------------------------------------|
| SVMR                        | Single-variable Mendelian randomization                       |
| IVW                         | Inverse variance weighted MR                                  |
| UKB                         | UK Biobank                                                    |
| N SNPs                      | number of single nucleotide polymorphisms in instrument       |
| beta                        | MR effect estimate                                            |
| se                          | standard error of MR effect estimate                          |
| LCI                         | lower bound of 95% confidence interval of estimate            |
| UCI                         | upper bound of 95% confidence interval of estimate            |
| OR                          | odds ratio for binary outcome                                 |
| OR LCI                      | lower bound of 95% confidence interval of odds ratio estimate |
| OR UCI                      | upper bound of 95% confidence interval of odds ratio estimate |
| P-value                     | P-value of MR effect estimate                                 |
| <b>Heterogeneity Tests:</b> |                                                               |

|                            |                                                        |
|----------------------------|--------------------------------------------------------|
| Q                          | Q statistic                                            |
| Q df                       | Q statistic degrees of freedom                         |
| Q P-value                  | Q statistic P-value                                    |
| <b>MR PRESSO test:</b>     |                                                        |
| RSSobs                     | residual sums of squares of observations               |
| P-value                    | P-value of global test                                 |
| <b>Directionality test</b> |                                                        |
| SNPs $R^2$ exposure        | variance in exposure explained by exposure instruments |
| SNPs $R^2$ outcome         | variance in outcome explained by exposure instruments  |
| <b>Instrument strength</b> |                                                        |
| F-stat                     | F-statistic                                            |
| F-stat LCI                 | lower bound 95% confidence interval of F-stat          |



**eTable 19. Multivariable Mendelian Randomization Results of Opioid and Non-Opioid Use Risk in UK Biobank Participants on Neuropsychiatric Disorders<sup>a</sup>**

| OUTCOME          | EXPOSURES          | METHOD   | N SNPs | beta  | se   | LCI   | UCI   | OR   | OR LCI | OR UCI | P-value | Heterogeneity test |       |           | MR-PRESSO global test |         |            |
|------------------|--------------------|----------|--------|-------|------|-------|-------|------|--------|--------|---------|--------------------|-------|-----------|-----------------------|---------|------------|
|                  |                    |          |        |       |      |       |       |      |        |        |         | Q                  | Q df  | Q P-value | RSS obs               | P-value | N outliers |
| MDD <sup>a</sup> | <b>OPIOID USE</b>  | MV IVW   | 92     | 0.13  | 0.05 | 0.04  | 0.23  | 1.14 | 1.04   | 1.25   | 0.005   | 85.14              | 88.00 | 0.57      | 94.58                 | 0.63    | 0          |
|                  | NSAID USE          |          |        | -0.02 | 0.08 | -0.18 | 0.14  | 0.98 | 0.84   | 1.15   | 0.81    |                    |       |           |                       |         |            |
|                  | ANILIDE USE        |          |        | 0.07  | 0.09 | -0.11 | 0.25  | 1.07 | 0.89   | 1.29   | 0.46    |                    |       |           |                       |         |            |
|                  | SALICYLIC ACID USE |          |        | -0.01 | 0.06 | -0.12 | 0.10  | 0.99 | 0.89   | 1.11   | 0.88    |                    |       |           |                       |         |            |
| MDD <sup>a</sup> | <b>OPIOID USE</b>  | MV Egger | 92     | 0.12  | 0.05 | 0.02  | 0.23  | 1.13 | 1.02   | 1.26   | 0.02    | 84.98              | 87.00 | 0.54      |                       |         | 0          |
|                  | NSAID USE          |          |        | 0.06  | 0.10 | -0.14 | 0.25  | 1.06 | 0.87   | 1.28   | 0.56    |                    |       |           |                       |         |            |
|                  | ANILIDE USE        |          |        | -0.03 | 0.09 | -0.20 | 0.14  | 0.97 | 0.82   | 1.15   | 0.72    |                    |       |           |                       |         |            |
|                  | SALICYLIC ACID USE |          |        | -0.02 | 0.06 | -0.14 | 0.10  | 0.98 | 0.87   | 1.11   | 0.76    |                    |       |           |                       |         |            |
|                  | Intercept          |          |        | 0.00  | 0.00 | -0.01 | 0.01  | 1.00 | 0.99   | 1.01   | 0.69    |                    |       |           |                       |         |            |
| ASRD             | <b>OPIOID USE</b>  | MV IVW   | 86     | 0.26  | 0.10 | 0.07  | 0.45  | 1.30 | 1.08   | 1.56   | 0.006   | 91.49              | 82.00 | 0.22      | 86.34                 | 0.59    | 0          |
|                  | NSAID USE          |          |        | 0.32  | 0.17 | -0.01 | 0.64  | 1.37 | 0.99   | 1.90   | 0.06    |                    |       |           |                       |         |            |
|                  | ANILIDE USE        |          |        | -0.34 | 0.19 | -0.71 | 0.03  | 0.71 | 0.49   | 1.03   | 0.07    |                    |       |           |                       |         |            |
|                  | SALICYLIC ACID USE |          |        | -0.05 | 0.12 | -0.28 | 0.19  | 0.96 | 0.76   | 1.21   | 0.70    |                    |       |           |                       |         |            |
| ASRD             | <b>OPIOID USE</b>  | MV Egger | 86     | 0.17  | 0.11 | -0.05 | 0.38  | 1.18 | 0.95   | 1.46   | 0.13    | 87.98              | 81.00 | 0.28      |                       |         | 0          |
|                  | NSAID USE          |          |        | -0.45 | 0.20 | -0.84 | -0.07 | 0.64 | 0.43   | 0.94   | 0.02    |                    |       |           |                       |         |            |
|                  | ANILIDE USE        |          |        | 0.20  | 0.17 | -0.14 | 0.55  | 1.23 | 0.87   | 1.73   | 0.24    |                    |       |           |                       |         |            |
|                  | SALICYLIC ACID USE |          |        | -0.17 | 0.14 | -0.44 | 0.10  | 0.84 | 0.64   | 1.10   | 0.21    |                    |       |           |                       |         |            |
|                  | Intercept          |          |        | 0.01  | 0.01 | 0.00  | 0.03  | 1.01 | 1.00   | 1.03   | 0.07    |                    |       |           |                       |         |            |

<sup>a</sup> For outcome phenotype MDD, summary statistics on MV instruments extracted from PGC GWAS excluding both UK Biobank (N = 29740) and 23andMe cohorts for total N = 143265 (no sample overlap)

|                             |                                                               |
|-----------------------------|---------------------------------------------------------------|
| <b>Abbreviations:</b>       |                                                               |
| MVMR                        | Multivariable Mendelian randomization                         |
| UKB                         | UK Biobank                                                    |
| N SNPs                      | Number of single nucleotide polymorphisms in instrument       |
| beta                        | effect estimate                                               |
| se                          | standard error of effect estimate                             |
| LCI                         | lower bound of 95% confidence interval of estimate            |
| UCI                         | upper bound of 95% confidence interval of estimate            |
| OR                          | odds ratio for binary outcome                                 |
| OR LCI                      | lower bound of 95% confidence interval of odds ratio estimate |
| OR UCI                      | upper bound of 95% confidence interval of odds ratio estimate |
| P-value                     | P-value of effect estimate                                    |
| <b>Heterogeneity Tests:</b> |                                                               |
| Q                           | Q statistic                                                   |
| Q df                        | Q statistic degrees of freedom                                |
| Q P-value                   | Q statistic P-value                                           |
| <b>MR PRESSO test:</b>      |                                                               |
| RSS obs                     | residual sums squares of observations                         |
| P-value                     | P-value of global test                                        |

**eTable 20. Multivariable Mendelian Randomization Results of Opioid Use Risk Accounting for Chronic Pain in UK Biobank Participants on MDD and ASRD**

| OUTCOME                | EXPOSURES                 | METHOD   | N SNPs | beta  | se   | LCI   | UCI  | OR   | OR LCI | OR UCI | P-value  | Heterogeneity test |      |           | MR-PRESSO global test |         |            |  |
|------------------------|---------------------------|----------|--------|-------|------|-------|------|------|--------|--------|----------|--------------------|------|-----------|-----------------------|---------|------------|--|
|                        |                           |          |        |       |      |       |      |      |        |        |          | Q                  | Q df | Q P-value | RSS obs               | P-value | N Outliers |  |
|                        | -                         |          |        |       |      |       |      |      |        |        |          |                    |      |           |                       |         |            |  |
| <b>MDD<sup>a</sup></b> | <b>OPIOID</b>             | MV IVW   | 47     | 0.12  | 0.04 | 0.05  | 0.19 | 1.12 | 1.05   | 1.21   | .001     | 54.43              | 45   | 0.16      | 59.05                 | 0.18    | None       |  |
|                        | BACK PAIN                 |          |        | 0.12  | 0.32 | -0.50 | 0.74 | 1.13 | 0.60   | 2.09   | .71      |                    |      |           |                       |         |            |  |
|                        | <b>OPIOID</b>             | MV Egger | 47     | 0.11  | 0.09 | -0.06 | 0.28 | 1.12 | 0.95   | 1.30   | .19      | 54.40              | 44   | 0.14      |                       |         |            |  |
|                        | BACK PAIN                 |          |        | 0.11  | 0.33 | -0.53 | 0.75 | 1.12 | 0.59   | 2.11   | .74      |                    |      |           |                       |         |            |  |
|                        | Intercept                 |          |        | 0.00  | 0.01 | -0.01 | 0.01 | 1.00 | 0.99   | 1.01   | .87      |                    |      |           |                       |         |            |  |
|                        |                           |          |        |       |      |       |      |      |        |        |          |                    |      |           |                       |         |            |  |
| <b>MDD</b>             | <b>OPIOID</b>             | MV IVW   | 61     | 0.14  | 0.03 | 0.08  | 0.21 | 1.15 | 1.08   | 1.23   | <0.001   | 69.84              | 59   | 0.16      | 74.48                 | 0.19    | None       |  |
|                        | HEADACHES                 |          |        | 0.05  | 0.17 | -0.28 | 0.39 | 1.06 | 0.76   | 1.47   | .75      |                    |      |           |                       |         |            |  |
|                        | <b>OPIOID</b>             | MV Egger | 61     | 0.12  | 0.07 | -0.02 | 0.26 | 1.13 | 0.98   | 1.29   | .08      | 69.68              | 58   | 0.14      |                       |         |            |  |
|                        | HEADACHES                 |          |        | 0.01  | 0.22 | -0.42 | 0.43 | 1.01 | 0.66   | 1.54   | .98      |                    |      |           |                       |         |            |  |
|                        | Intercept                 |          |        | 0.00  | 0.00 | -0.01 | 0.01 | 1.00 | 0.99   | 1.01   | .72      |                    |      |           |                       |         |            |  |
|                        |                           |          |        |       |      |       |      |      |        |        |          |                    |      |           |                       |         |            |  |
| <b>MDD</b>             | <b>OPIOID</b>             | MV IVW   | 46     | 0.14  | 0.03 | 0.07  | 0.20 | 1.15 | 1.07   | 1.22   | 2.74E-04 | 50.45              | 44   | 0.23      | 54.75                 | 0.28    | None       |  |
|                        | NECK/<br>SHOULDER<br>PAIN |          |        | -0.50 | 0.30 | -1.10 | 0.10 | 0.61 | 0.33   | 1.10   | 0.10     |                    |      |           |                       |         |            |  |
|                        | <b>OPIOID</b>             | MV Egger | 46     | 0.11  | 0.08 | -0.04 | 0.26 | 1.12 | 0.96   | 1.30   | 0.15     | 50.31              | 43   | 0.21      |                       |         |            |  |
|                        | NECK/<br>SHOULDER<br>PAIN |          |        | -0.50 | 0.31 | -1.10 | 0.10 | 0.60 | 0.33   | 1.10   | 0.10     |                    |      |           |                       |         |            |  |
|                        | Intercept                 |          |        | 0.00  | 0.01 | -0.01 | 0.01 | 1.00 | 0.99   | 1.01   | 0.73     |                    |      |           |                       |         |            |  |
|                        |                           |          |        |       |      |       |      |      |        |        |          |                    |      |           |                       |         |            |  |
| <b>MDD</b>             | <b>OPIOID</b>             | MV IVW   | 41     | 0.14  | 0.04 | 0.07  | 0.22 | 1.15 | 1.07   | 1.24   | 3.42E-04 | 49.93              | 39   | 0.11      | 55.64                 | 0.11    | None       |  |
|                        | KNEE PAIN                 |          |        | -0.61 | 0.45 | -1.50 | 0.28 | 0.54 | 0.22   | 1.32   | 0.18     |                    |      |           |                       |         |            |  |
|                        | <b>OPIOID</b>             | MV Egger | 41     | 0.15  | 0.10 | -0.05 | 0.34 | 1.16 | 0.96   | 1.40   | 0.14     | 49.93              | 38   | 0.09      |                       |         |            |  |

| OUTCOME     | EXPOSURES         | METHOD   | N SNPs | beta  | se   | LCI   | UCI  | OR   | OR LCI | OR UCI | P-value  | Heterogeneity test |      |           | MR-PRESSO global test |         |            |
|-------------|-------------------|----------|--------|-------|------|-------|------|------|--------|--------|----------|--------------------|------|-----------|-----------------------|---------|------------|
|             |                   |          |        |       |      |       |      |      |        |        |          | Q                  | Q df | Q P-value | RSS obs               | P-value | N Outliers |
|             | KNEE PAIN         |          |        | -0.61 | 0.46 | -1.52 | 0.29 | 0.54 | 0.22   | 1.33   | 0.18     |                    |      |           |                       |         |            |
|             | Intercept         |          |        | 0.00  | 0.01 | -0.01 | 0.01 | 1.00 | 0.99   | 1.01   | 0.99     |                    |      |           |                       |         |            |
| <b>MDD</b>  | <b>OPIOID</b>     | MV IVW   | 44     | 0.13  | 0.03 | 0.07  | 0.19 | 1.14 | 1.07   | 1.21   | 1.97E-04 | 47.14              | 42   | 0.27      | 52.25                 | 0.31    | None       |
|             | HIP PAIN          |          |        | 0.23  | 0.26 | -0.27 | 0.74 | 1.26 | 0.76   | 2.09   | 0.37     |                    |      |           |                       |         |            |
|             | <b>OPIOID</b>     | MV Egger | 44     | 0.18  | 0.08 | 0.03  | 0.33 | 1.19 | 1.03   | 1.39   | 0.02     | 46.62              | 41   | 0.25      |                       |         |            |
|             | HIP PAIN          |          |        | 0.30  | 0.28 | -0.25 | 0.85 | 1.35 | 0.78   | 2.33   | 0.28     |                    |      |           |                       |         |            |
|             | Intercept         |          |        | 0.00  | 0.01 | -0.01 | 0.01 | 1.00 | 0.99   | 1.01   | 0.50     |                    |      |           |                       |         |            |
| <b>MDD</b>  | <b>OPIOID</b>     | MV IVW   | 41     | 0.14  | 0.04 | 0.07  | 0.20 | 1.15 | 1.07   | 1.23   | 4.42E-04 | 46.52              | 39   | 0.19      | 50.94                 | 0.22    | None       |
|             | ABDOMINAL PAIN    |          |        | -0.24 | 0.19 | -0.61 | 0.14 | 0.79 | 0.54   | 1.15   | 0.21     |                    |      |           |                       |         |            |
|             | <b>OPIOID</b>     | MV Egger | 41     | 0.10  | 0.10 | -0.10 | 0.29 | 1.10 | 0.90   | 1.34   | 0.35     | 46.30              | 38   | 0.17      |                       |         |            |
|             | ABDOMINAL PAIN    |          |        | -0.21 | 0.20 | -0.61 | 0.19 | 0.81 | 0.54   | 1.21   | 0.30     |                    |      |           |                       |         |            |
|             | Intercept         |          |        | 0.00  | 0.01 | -0.01 | 0.01 | 1.00 | 0.99   | 1.01   | 0.67     |                    |      |           |                       |         |            |
| <b>ASRD</b> | <b>OPIOID</b>     | MV IVW   | 42     | 0.19  | 0.08 | 0.04  | 0.34 | 1.21 | 1.04   | 1.41   | 0.002    | 65.72              | 40   | 0.01      | 71.78                 | 0.01    | one        |
|             | BACK PAIN         |          |        | -0.04 | 0.77 | -1.55 | 1.47 | 0.96 | 0.21   | 4.36   | 0.96     |                    |      |           |                       |         |            |
|             | <b>OPIOID</b>     | MV Egger | 42     | 0.10  | 0.18 | -0.26 | 0.46 | 1.11 | 0.77   | 1.58   | 0.58     | 65.21              | 39   | 0.01      |                       |         |            |
|             | BACK PAIN         |          |        | -0.09 | 0.78 | -1.62 | 1.44 | 0.91 | 0.20   | 4.24   | 0.91     |                    |      |           |                       |         |            |
|             | Intercept         |          |        | 0.01  | 0.01 | -0.02 | 0.03 | 1.01 | 0.98   | 1.03   | 0.57     |                    |      |           |                       |         |            |
|             | OUTLIER CORRECTED |          |        |       |      |       |      |      |        |        |          |                    |      |           |                       |         |            |
|             | <b>OPIOID</b>     | MV IVW   | 42     | 0.23  | 0.07 | 0.09  | 0.37 | 1.26 | 1.09   | 1.45   | 0.002    | 55.15              | 39   | 0.06      | 60.58                 | 0.07    |            |
|             | BACK PAIN         |          |        | -0.23 | 0.72 | -1.63 | 1.18 | 0.80 | 0.20   | 3.26   | 0.75     |                    |      |           |                       |         |            |
|             | <b>OPIOID</b>     | MV Egger | 42     | 0.24  | 0.18 | -0.11 | 0.59 | 1.27 | 0.90   | 1.80   | 0.18     | 55.14              | 38   | 0.04      |                       |         |            |
|             | BACK PAIN         |          |        | -0.22 | 0.73 | -1.65 | 1.21 | 0.80 | 0.19   | 3.36   | 0.76     |                    |      |           |                       |         |            |

| OUTCOME     | EXPOSURES                 | METHOD   | N SNPs | beta  | se   | LCI   | UCI  | OR   | OR LCI | OR UCI | P-value  | Heterogeneity test |      |           | MR-PRESSO global test |         |            |
|-------------|---------------------------|----------|--------|-------|------|-------|------|------|--------|--------|----------|--------------------|------|-----------|-----------------------|---------|------------|
|             |                           |          |        |       |      |       |      |      |        |        |          | Q                  | Q df | Q P-value | RSS obs               | P-value | N Outliers |
|             | Intercept                 |          |        | 0.00  | 0.01 | -0.02 | 0.02 | 1.00 | 0.98   | 1.02   | 0.95     |                    |      |           |                       |         |            |
| <b>ASRD</b> | <b>OPIOID</b>             | MV IVW   | 57     | 0.26  | 0.07 | 0.12  | 0.39 | 1.29 | 1.13   | 1.48   | 4.60E-04 | 76.94              | 55   | 0.03      | 82.78                 | 0.03    | None       |
|             | HEADACHES                 |          |        | 0.04  | 0.36 | -0.67 | 0.75 | 1.04 | 0.51   | 2.12   | 0.91     |                    |      |           |                       |         |            |
|             | <b>OPIOID</b>             | MV Egger | 57     | 0.11  | 0.14 | -0.17 | 0.39 | 1.12 | 0.84   | 1.48   | 0.45     | 74.95              | 54   | 0.03      |                       |         |            |
|             | HEADACHES                 |          |        | -0.31 | 0.47 | -1.23 | 0.60 | 0.73 | 0.29   | 1.83   | 0.50     |                    |      |           |                       |         |            |
|             | Intercept                 |          |        | 0.01  | 0.01 | -0.01 | 0.03 | 1.01 | 0.99   | 1.03   | 0.23     |                    |      |           |                       |         |            |
| <b>ASRD</b> | <b>OPIOID</b>             | MV IVW   | 42     | 0.25  | 0.08 | 0.10  | 0.39 | 1.28 | 1.11   | 1.48   | 1.96E-03 | 60.63              | 40   | 0.02      | 67.12                 | 0.02    | None       |
|             | NECK/<br>SHOULDER<br>PAIN |          |        | 0.67  | 0.73 | -0.76 | 2.09 | 1.95 | 0.47   | 8.11   | 0.36     |                    |      |           |                       |         |            |
|             | <b>OPIOID</b>             | MV Egger | 42     | 0.02  | 0.17 | -0.31 | 0.36 | 1.02 | 0.73   | 1.43   | 0.90     | 57.47              | 39   | 0.03      |                       |         |            |
|             | NECK/<br>SHOULDER<br>PAIN |          |        | 0.65  | 0.72 | -0.75 | 2.06 | 1.92 | 0.47   | 7.84   | 0.36     |                    |      |           |                       |         |            |
|             | Intercept                 |          |        | 0.02  | 0.01 | 0.00  | 0.03 | 1.02 | 1.00   | 1.04   | 0.14     |                    |      |           |                       |         |            |
| <b>ASRD</b> | <b>OPIOID</b>             | MV IVW   | 40     | 0.22  | 0.08 | 0.07  | 0.37 | 1.25 | 1.07   | 1.45   | 5.00E-03 | 62.89              | 38   | 0.01      | 68.91                 | 0.01    | None       |
|             | KNEE PAIN                 |          |        | -0.25 | 1.02 | -2.26 | 1.76 | 0.78 | 0.10   | 5.81   | 0.81     |                    |      |           |                       |         |            |
|             | <b>OPIOID</b>             | MV Egger | 40     | -0.06 | 0.20 | -0.44 | 0.33 | 0.95 | 0.64   | 1.39   | 0.78     | 59.13              | 37   | 0.01      |                       |         |            |
|             | KNEE PAIN                 |          |        | -0.23 | 1.01 | -2.20 | 1.74 | 0.79 | 0.11   | 5.72   | 0.82     |                    |      |           |                       |         |            |
|             | Intercept                 |          |        | 0.02  | 0.01 | -0.01 | 0.04 | 1.02 | 0.99   | 1.04   | 0.13     |                    |      |           |                       |         |            |
| <b>ASRD</b> | <b>OPIOID</b>             | MV IVW   | 34     | 0.23  | 0.08 | 0.07  | 0.39 | 1.26 | 1.08   | 1.48   | 4.00E-03 | 55.02              | 32   | 0.01      | 62.42                 | 0.01    | None       |
|             | HIP PAIN                  |          |        | -1.45 | 1.64 | -4.67 | 1.77 | 0.23 | 0.01   | 5.86   | 0.38     |                    |      |           |                       |         |            |
|             | <b>OPIOID</b>             | MV Egger | 34     | -0.14 | 0.24 | -0.60 | 0.32 | 0.87 | 0.55   | 1.38   | 0.55     | 50.46              | 31   | 0.02      |                       |         |            |
|             | HIP PAIN                  |          |        | -1.80 | 1.61 | -4.96 | 1.36 | 0.17 | 0.01   | 3.90   | 0.26     |                    |      |           |                       |         |            |

| OUTCOME     | EXPOSURES      | METHOD   | N SNPs | beta | se   | LCI   | UCI  | OR   | OR LCI | OR UCI | P-value  | Heterogeneity test |      |           | MR-PRESSO global test |         |            |
|-------------|----------------|----------|--------|------|------|-------|------|------|--------|--------|----------|--------------------|------|-----------|-----------------------|---------|------------|
|             |                |          |        |      |      |       |      |      |        |        |          | Q                  | Q df | Q P-value | RSS obs               | P-value | N Outliers |
|             | Intercept      |          |        | 0.03 | 0.02 | 0.00  | 0.06 | 1.03 | 1.00   | 1.06   | 0.09     |                    |      |           |                       |         |            |
| <b>ASRD</b> | <b>OPIOID</b>  | MV IVW   | 38     | 0.24 | 0.07 | 0.10  | 0.38 | 1.27 | 1.11   | 1.46   | 1.00E-03 | 49.11              | 36   | 0.07      | 54.50                 | 0.09    | None       |
|             | ABDOMINAL PAIN |          |        | 0.14 | 0.42 | -0.68 | 0.97 | 1.15 | 0.51   | 2.63   | 0.73     |                    |      |           |                       |         |            |
|             | <b>OPIOID</b>  | MV Egger | 38     | 0.25 | 0.21 | -0.16 | 0.66 | 1.29 | 0.85   | 1.94   | 0.24     | 49.11              | 35   | 0.06      |                       |         |            |
|             | ABDOMINAL PAIN |          |        | 0.14 | 0.45 | -0.74 | 1.02 | 1.15 | 0.48   | 2.77   | 0.76     |                    |      |           |                       |         |            |
|             | Intercept      |          |        | 0.00 | 0.01 | -0.02 | 0.02 | 1.00 | 0.98   | 1.02   | 0.97     |                    |      |           |                       |         |            |

<sup>a</sup> For outcome phenotype MDD, summary statistics on MV instruments extracted from PGC GWAS excluding both UK Biobank (N = 29740) and 23andMe cohorts for total N = 143265 (no sample overlap)

|                             |                                                               |
|-----------------------------|---------------------------------------------------------------|
| <b>Abbreviations:</b>       |                                                               |
| MVMR                        | Multivariable Mendelian randomization                         |
| UKB                         | UK Biobank                                                    |
| N SNPs                      | Number of single nucleotide polymorphisms in instrument       |
| beta                        | effect estimate                                               |
| se                          | standard error of effect estimate                             |
| LCI                         | lower bound of 95% confidence interval of estimate            |
| UCI                         | upper bound of 95% confidence interval of estimate            |
| OR                          | odds ratio for binary outcome                                 |
| OR LCI                      | lower bound of 95% confidence interval of odds ratio estimate |
| OR UCI                      | upper bound of 95% confidence interval of odds ratio estimate |
| P-value                     | P-value of effect estimate                                    |
| <b>Heterogeneity Tests:</b> |                                                               |
| Q                           | Q statistic                                                   |
| Q df                        | Q statistic degrees of freedom                                |
| Q P-value                   | Q statistic P-value                                           |
| <b>MR PRESSO test:</b>      |                                                               |
| RSS obs                     | residual sums squares of observations                         |
| P-value                     | P-value of global test                                        |

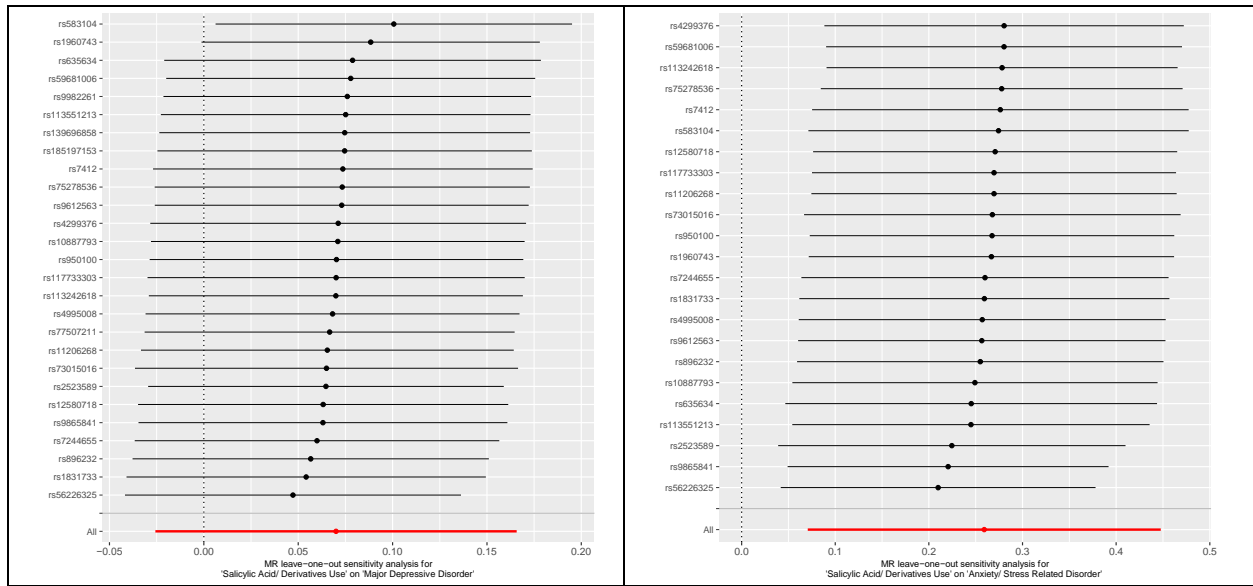

**eFigure 1. Leave-1-Out Analysis of Associations of Genetic Risk of Salicylic Acid/ Derivatives Use on Risk of MDD and ASRD.** IVW performed leaving out each SNP in turn to identify if a single SNP may be driving the association, with results illustrated in plot showing that no SNP was driving the association between genetic risk of prescription opioid use and MDD (LEFT) and ASRD (RIGHT). **Abbreviations:** MDD, major depression or major depressive disorder (depending on study used in GWAS); ASRD, anxiety and stress-related disorders; IVW, inverse-variance weighted Mendelian randomization; SNP, single nucleotide polymorphism.

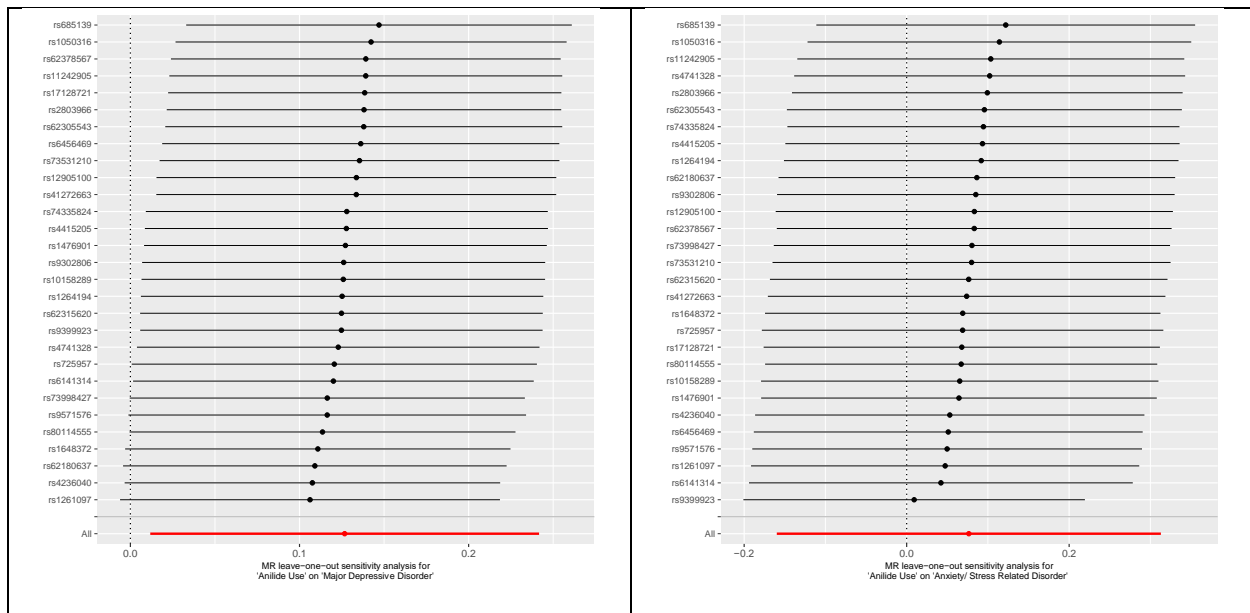

**Figure 2. Leave-1-Out Analysis of Associations of Genetic Risk of Anilide Use on Risk of MDD and ASRD.** IVW performed leaving out each SNP in turn to identify if a single SNP may be driving the association, with results illustrated in plot showing that no SNP was driving the association between genetic risk of prescription opioid use and MDD (LEFT) and ASRD (RIGHT). **Abbreviations:** MDD, major depression or major depressive disorder (depending on study used in GWAS); ASRD, anxiety and stress-related disorders; IVW, inverse-variance weighted Mendelian randomization; SNP, single nucleotide polymorphism.



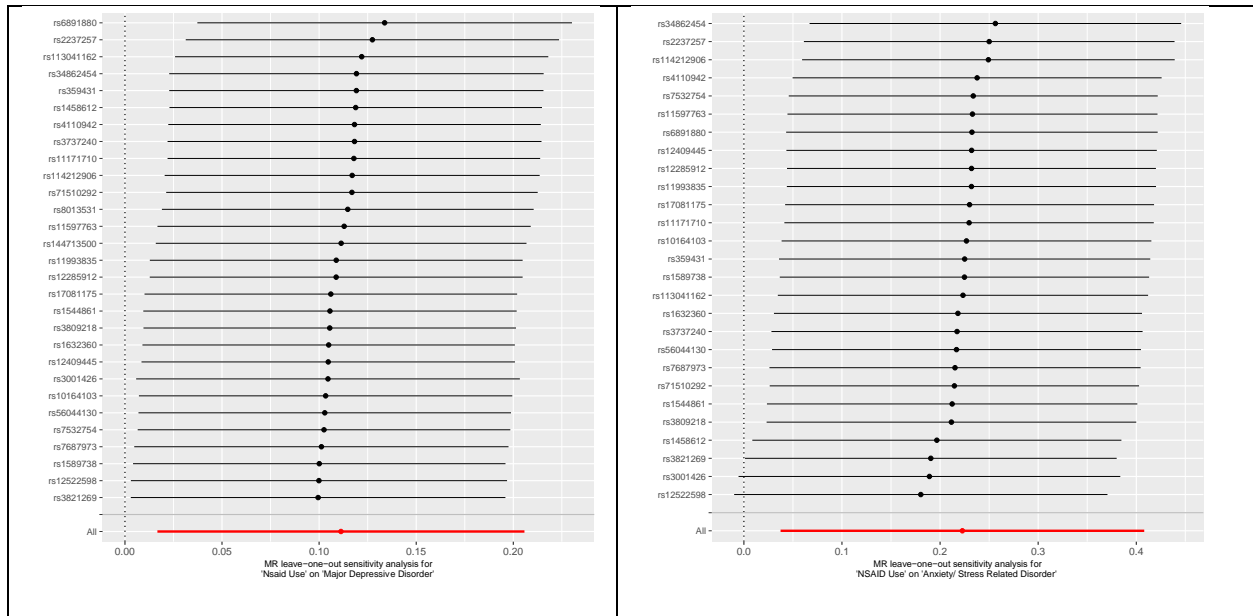

**eFigure 3. Leave-1-Out Analysis of Associations of Genetic Risk of NSAID Use on Risk of MDD and ASRD.** IVW performed leaving out each SNP in turn to identify if a single SNP may be driving the association, with results illustrated in plot showing that no SNP was driving the association between genetic risk of prescription opioid use and MDD (LEFT) and ASRD (RIGHT). **Abbreviations:** MDD, major depression or major depressive disorder (depending on study used in GWAS); ASRD, anxiety and stress-related disorders; IVW, inverse-variance weighted Mendelian randomization; SNP, single nucleotide polymorphism; NSAID, nonsteroidal anti-inflammatory drugs.

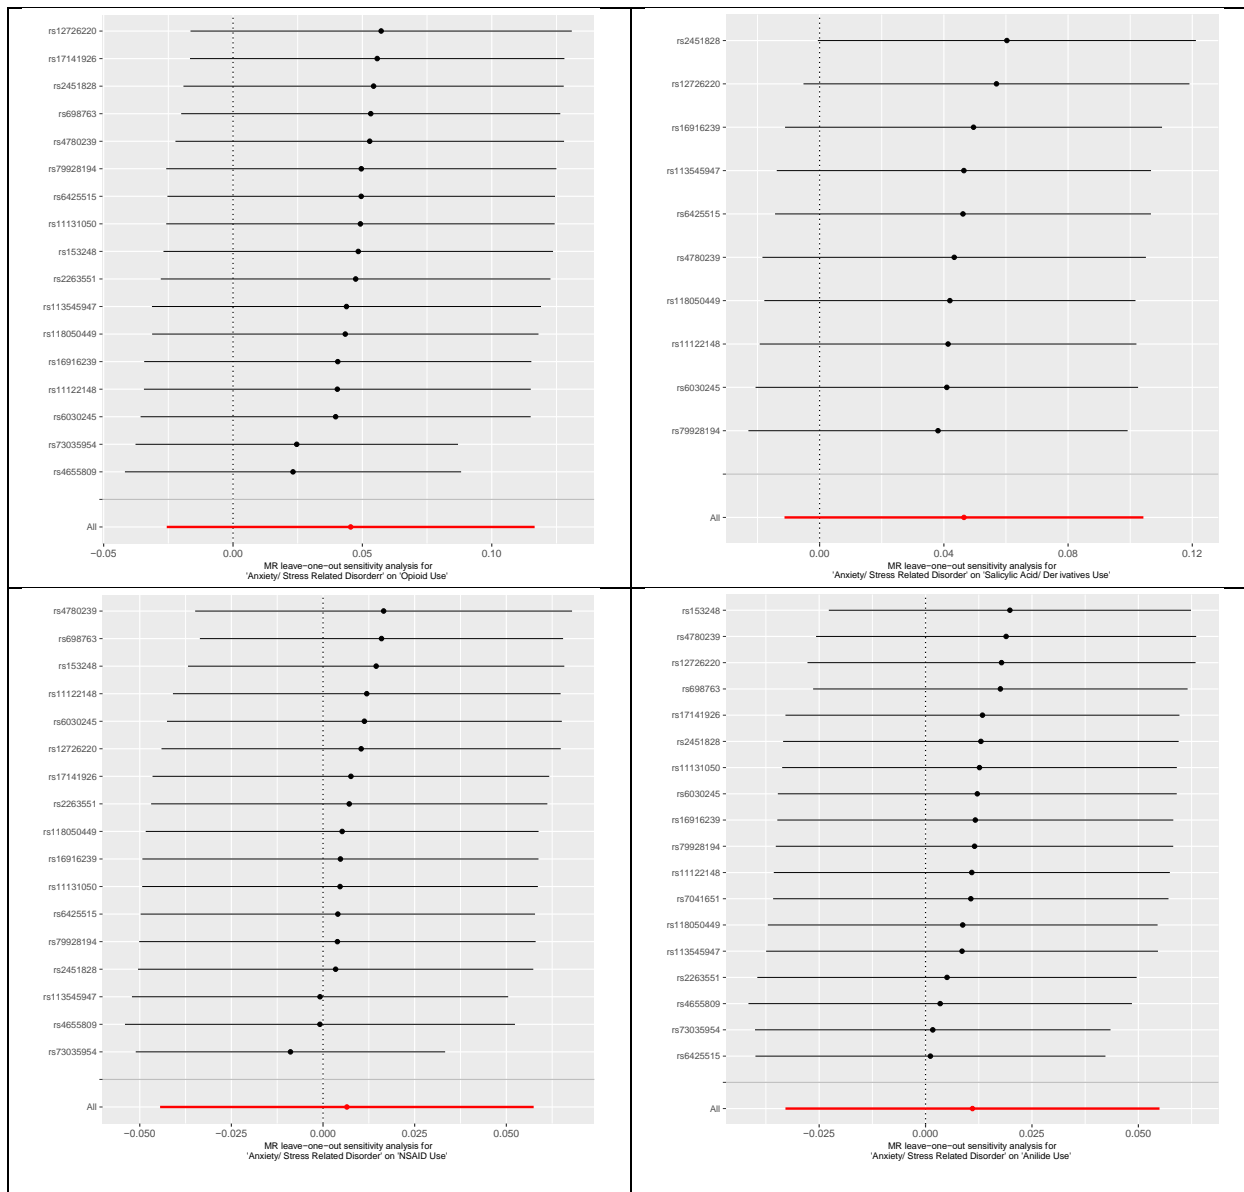

**eFigure 4. Leave-1-Out Analysis of Associations of Genetic Risk of ASDR on Risk of Pain Medications Use.** IVW performed leaving out each SNP in turn to identify if a single SNP may be driving the association, with results illustrated in plot showing that no SNP was driving the association between genetic risk of ASDR and Prescription Opioid Use (TOP LEFT), Salicylic Acid/ Der ivatives Use (TOP RIGHT), NSAID Use (BOTTOM LEFT) and Anilide Use (BOTTOM RIGHT).

**Abbreviations:** MDD, major depression or major depressive disorder (depending on study used in GWAS); ASDR, anxiety and stress-related disorders; IVW, inverse-variance weighted Mendelian randomization; SNP, single nucleotide polymorphism; NSAID, nonsteroidal anti-inflammatory drugs.

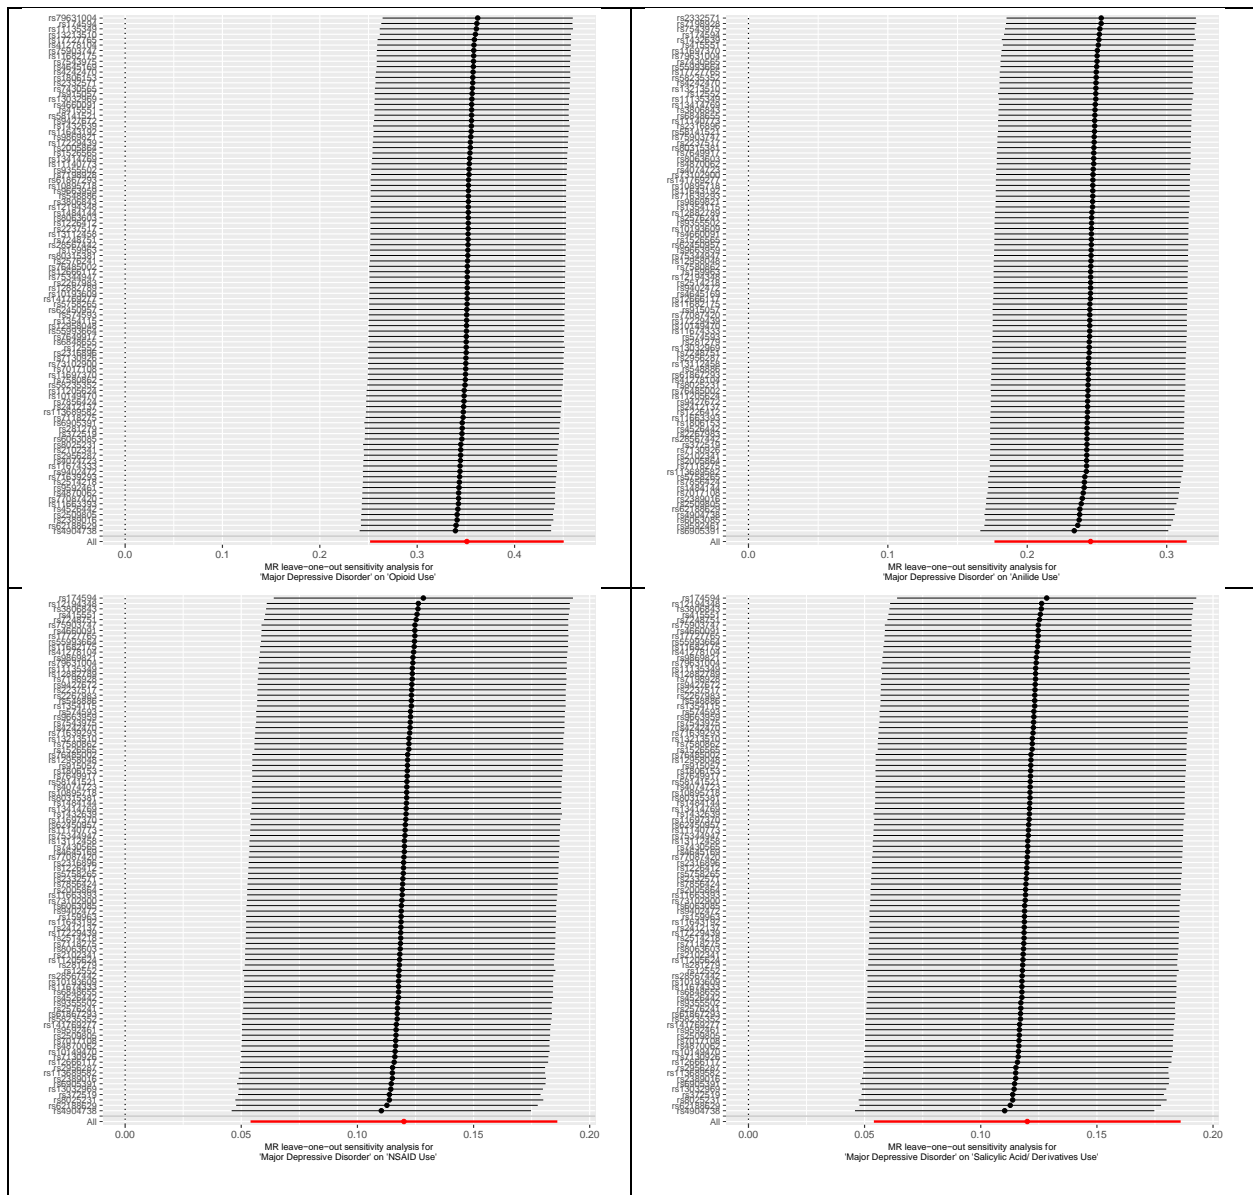

**eFigure 5. Leave-1-Out Analysis of Associations of Genetic Risk of MDD on Risk of Pain Medications Use.** IVW performed leaving out each SNP in turn to identify if a single SNP may be driving the association, with results illustrated in plot showing that no SNP was driving the association between genetic risk of ASD and Prescription Opioid Use (TOP LEFT), Salicylic Acid/ Derivatives Use (TOP RIGHT), NSAID Use (BOTTOM LEFT) and Anilide Use (BOTTOM RIGHT).

**Abbreviations:** MDD, major depression or major depressive disorder (depending on study used in GWAS); ASD, anxiety and stress-related disorders; IVW, inverse-variance weighted Mendelian randomization; SNP, single nucleotide polymorphism; NSAID, nonsteroidal anti-inflammatory drugs.
